# Supplementary material for: C(acyl)–C(sp2) and C(sp2)–C(sp2) Suzuki–Miyaura cross-coupling reactions using nitrile-functionalized NHC palladium complexes
Source: Royal Society of Chemistry journal article supplement (doi:10.1039/d1ra07231e), 2021-01-01
Supplement: d1ra07231e1.pdf [file d1ra07231e1.pdf]

## Supporting Information

### **C(acyl)-C(sp<sup>2</sup>) and C(sp<sup>2</sup>)-C(sp<sup>2</sup>) Suzuki-Miyaura Cross-Coupling Reactions Using Nitrile-Functionalized NHC Palladium Complexes**

Sinem Çakır,<sup>a</sup> Serdar Batıkan Kavukcu,<sup>a</sup> Hande Karabıyık,<sup>b</sup> Senthil Rethinam,<sup>c,d</sup> and Hayati Türkmen<sup>a\*</sup>

<sup>a</sup>Department of Chemistry, Ege University, 35100 Bornova, Izmir, Turkey

<sup>b</sup>Dokuz Eylül University, Faculty of Science and Art, Department of Physics, Izmir, Turkey.

<sup>c</sup>School of Natural and Applied Science, Ege University, 35100, Bornova, Izmir, Turkey.

<sup>d</sup>School of Bio & Chemical Engineering, Sathyabama University, Chennai, 600 199, Tamilnadu, India.

#### Contents

|                                                                                               |       |
|-----------------------------------------------------------------------------------------------|-------|
| <sup>1</sup> H- and <sup>13</sup> C- NMR spectras of <b>1a-f</b>                              | 2-7   |
| <sup>1</sup> H- and <sup>13</sup> C- NMR spectras of <b>2a-c</b> , <b>3b-f</b> and <b>3b'</b> | 8-16  |
| <sup>1</sup> H- and <sup>13</sup> C- NMR spectras of the Acylative Suzuki products            | 17-31 |
| <sup>1</sup> H- and <sup>13</sup> C- NMR spectras of the Suzuki products                      | 32-55 |
| FTIR spectras of <b>2a-c</b> , <b>3b-f</b> and <b>3b'</b>                                     | 56-62 |
| TGA spectras of <b>3c</b> and nanoparticle of <b>3c</b>                                       | 63-64 |
| Crystal data and structure refinement parameters for <b>3c</b> , <b>3e</b> and <b>3f</b>      | 65    |

# $^1\text{H}$ - and $^{13}\text{C}$ - NMR spectra of the compound **1a-f**

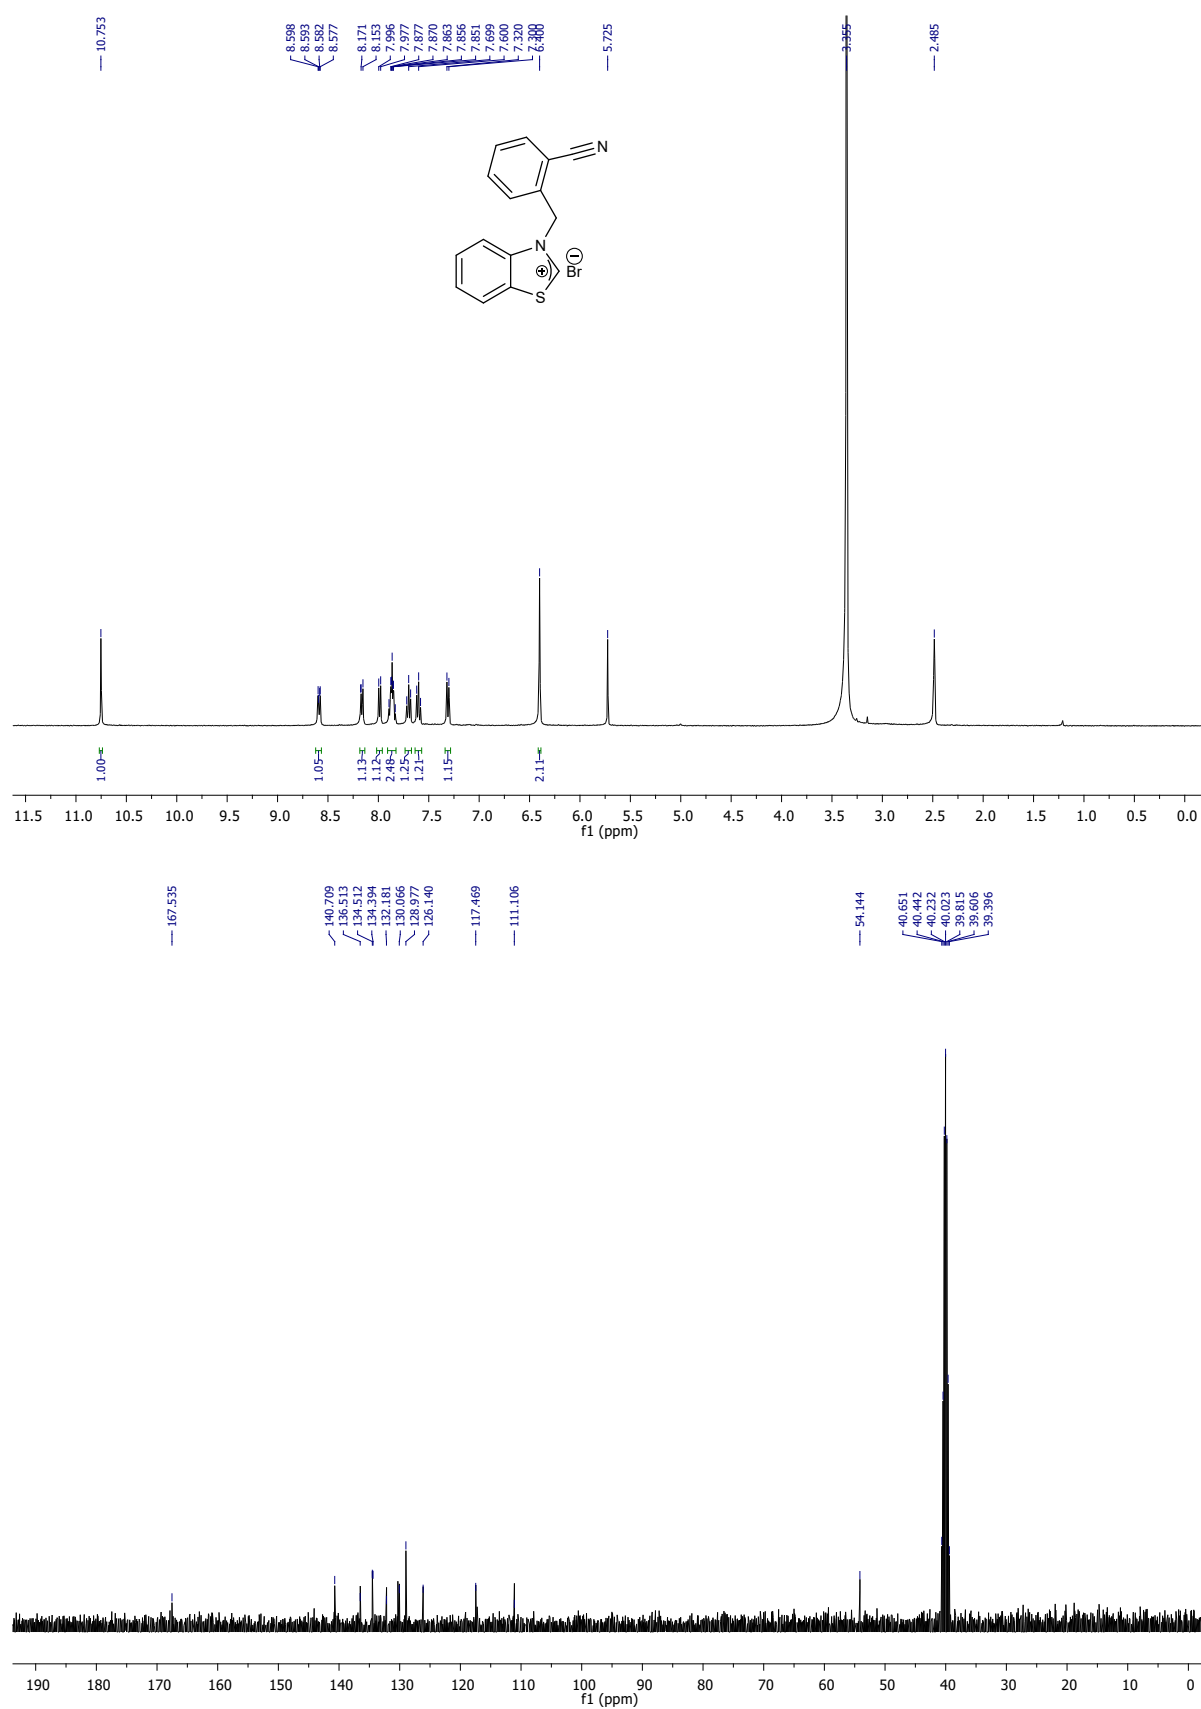

Figure S1.  $^1\text{H}$  and  $^{13}\text{C}$  NMR spectra of compound **1a** ( $\text{DMSO-}d_6$ ).

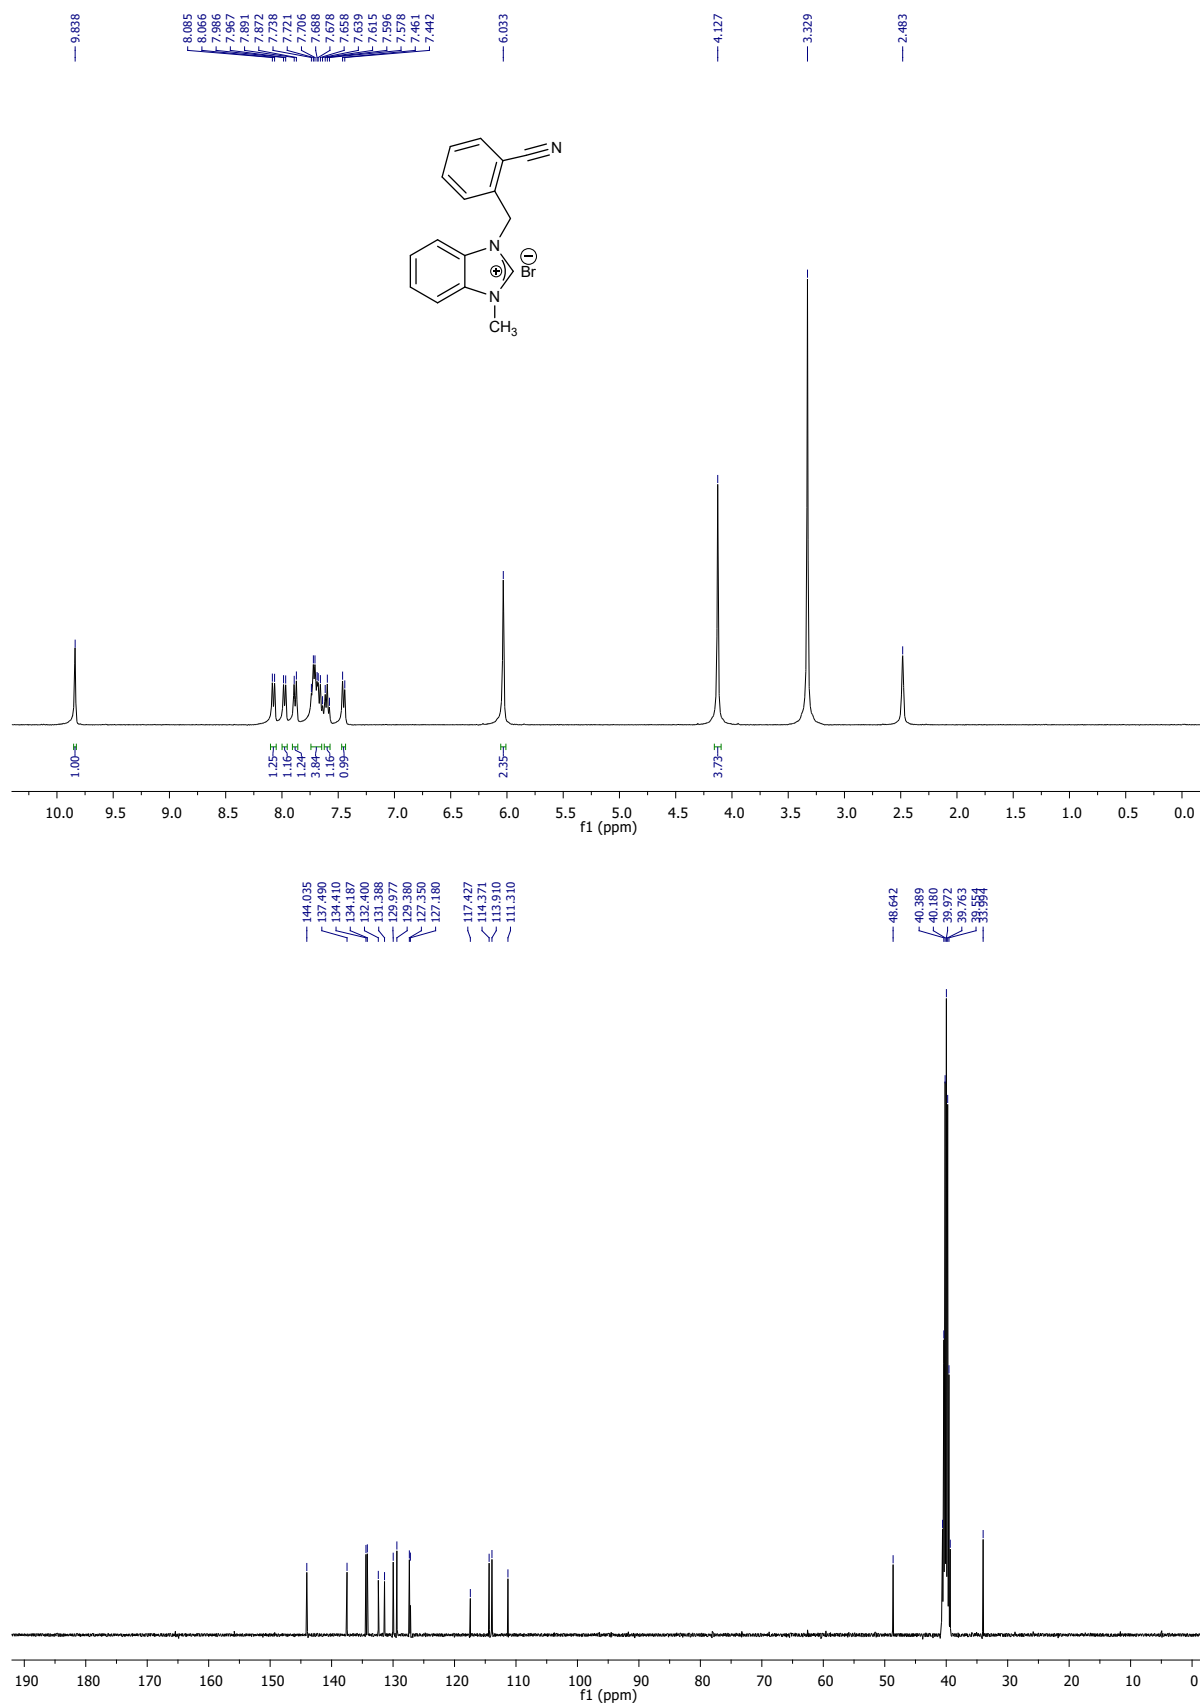

Figure S2. <sup>1</sup>H and <sup>13</sup>C NMR spectra of compound **1b** (DMSO-*d*<sub>6</sub>).

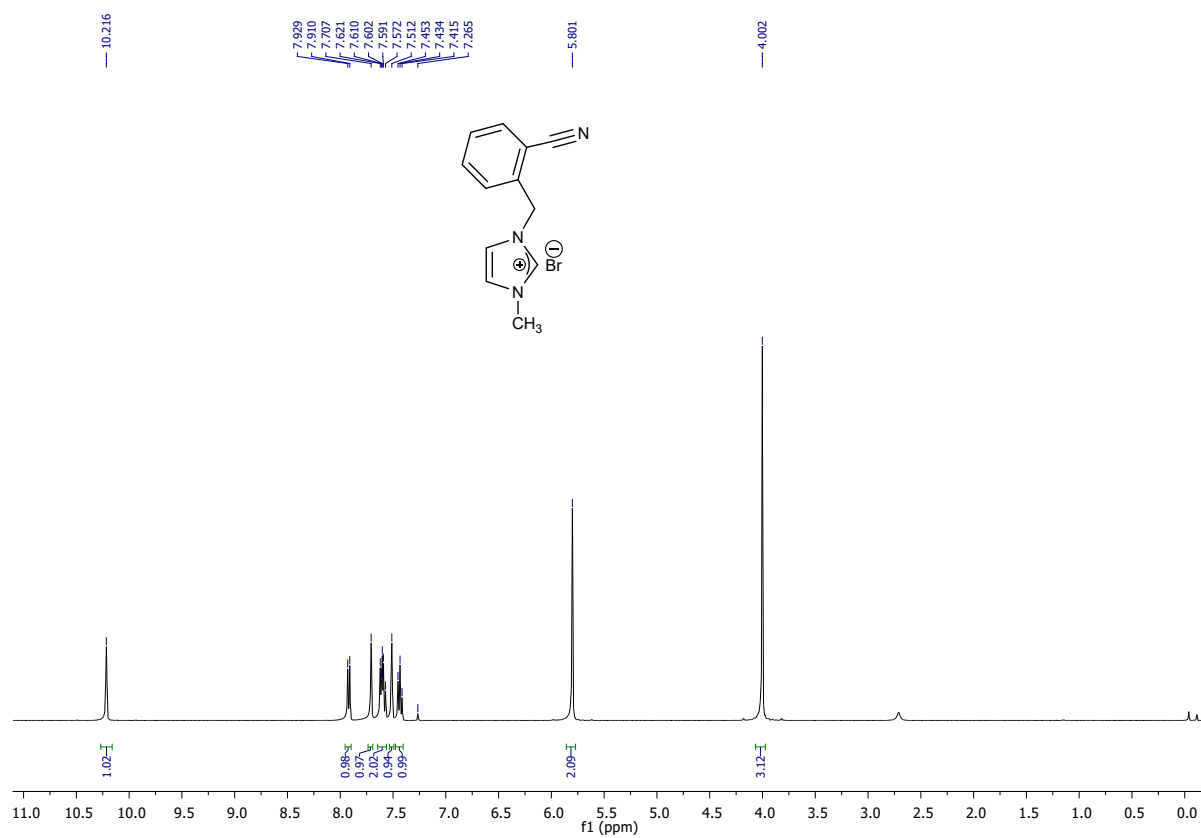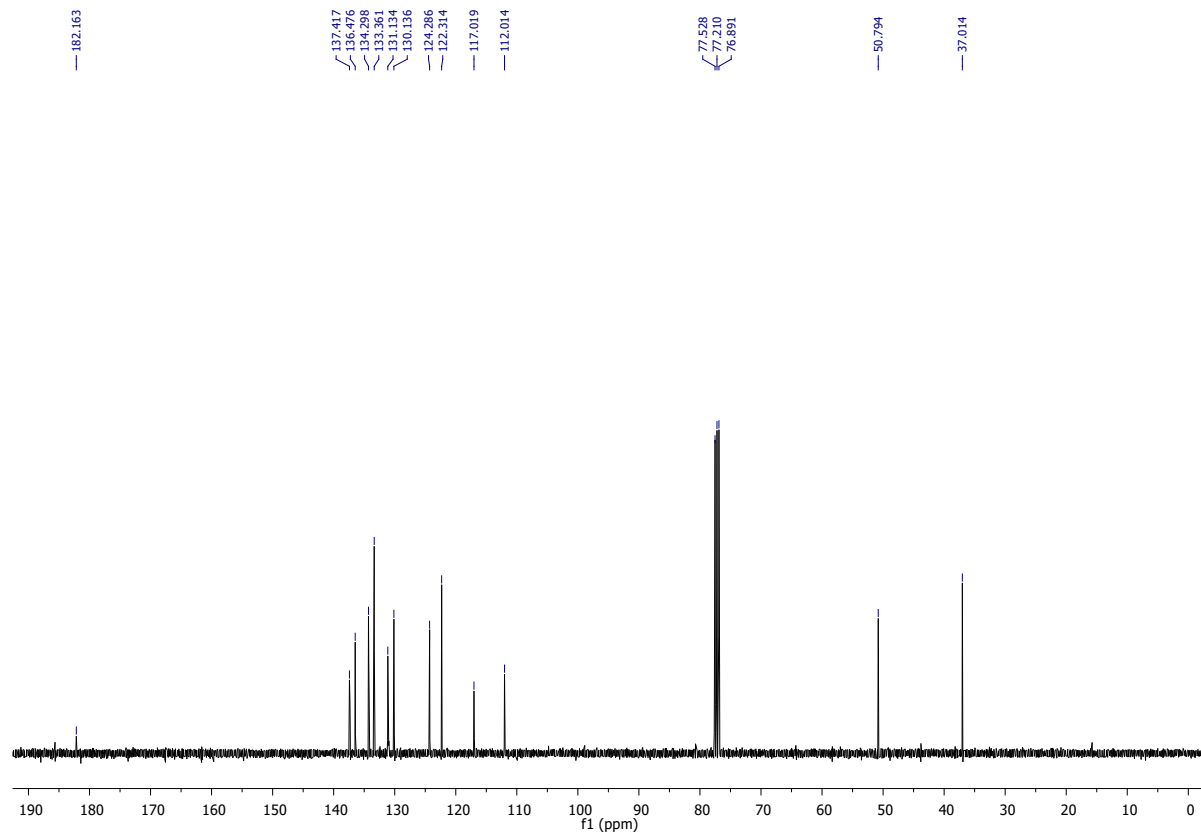

Figure S3. <sup>1</sup>H and <sup>13</sup>C NMR spectra of compound **1c** (CDCl<sub>3</sub>).

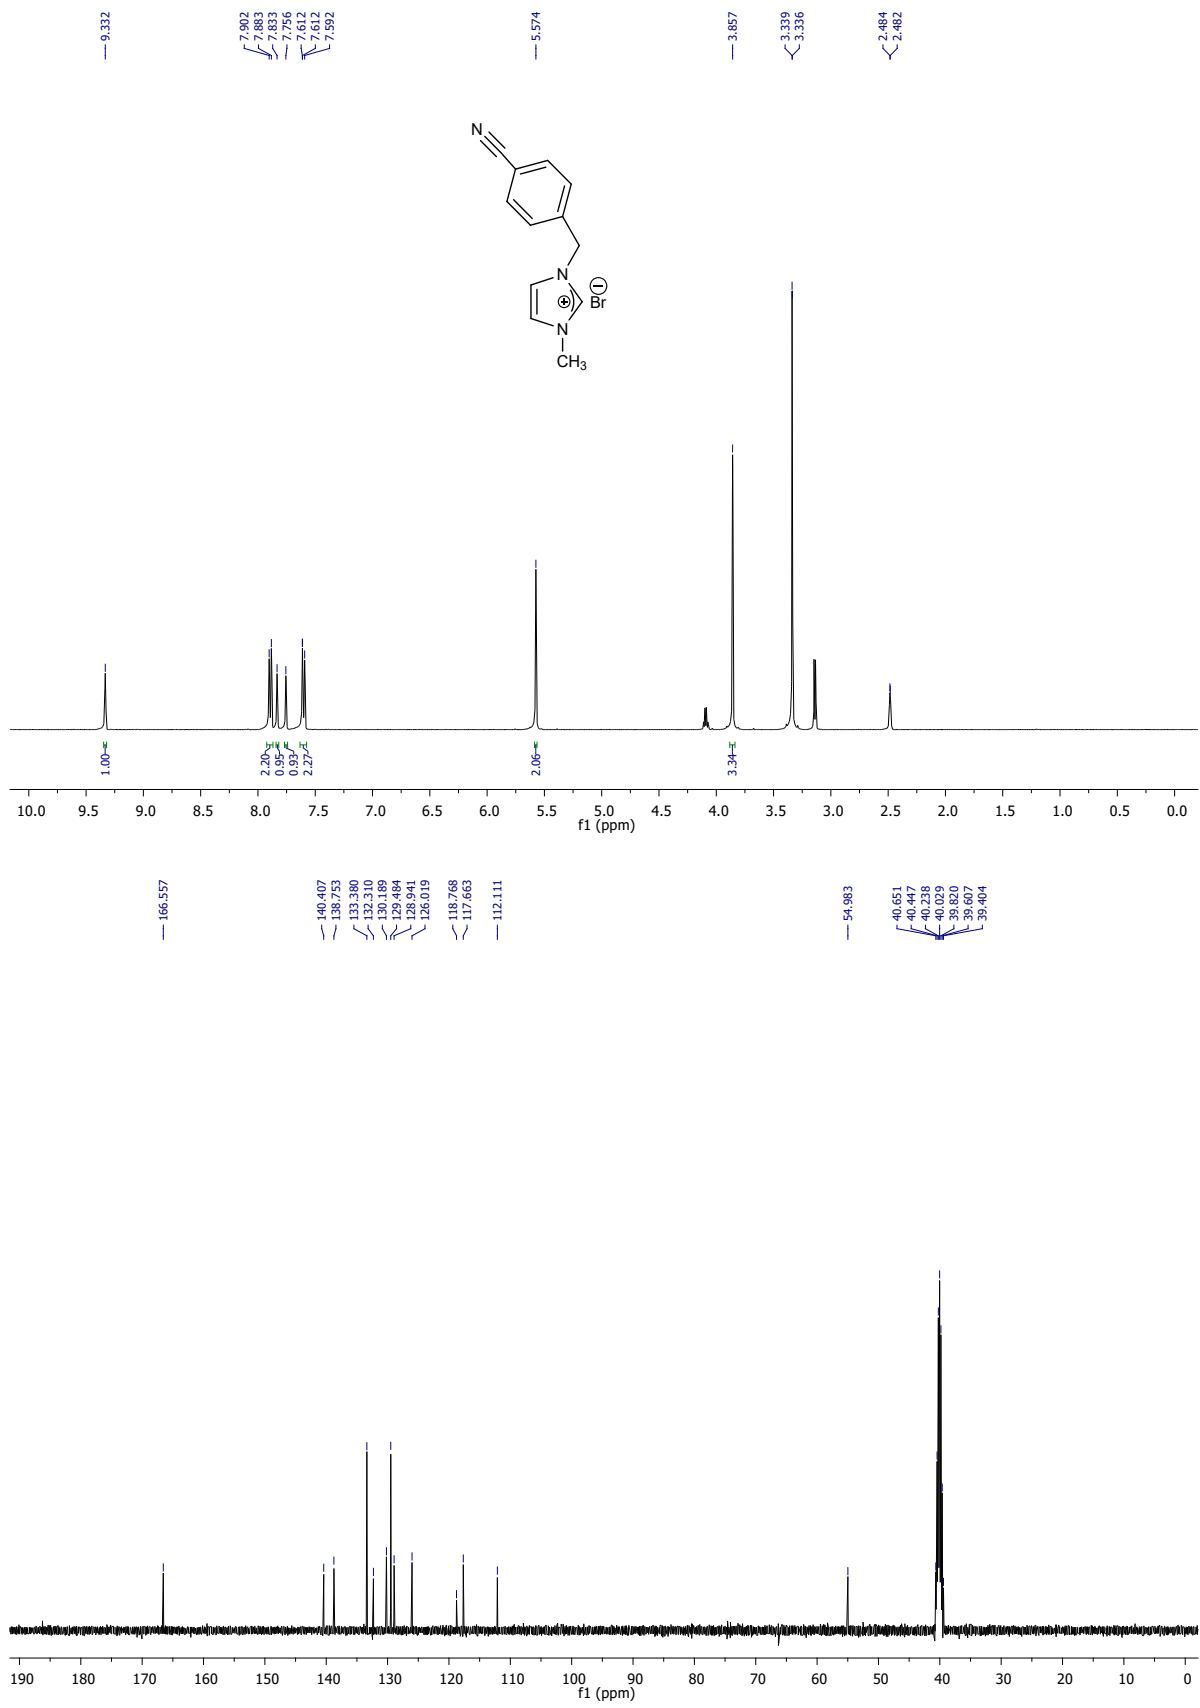

Figure S4. <sup>1</sup>H and <sup>13</sup>C NMR spectra of compound **1d** (DMSO-*d*<sub>6</sub>).

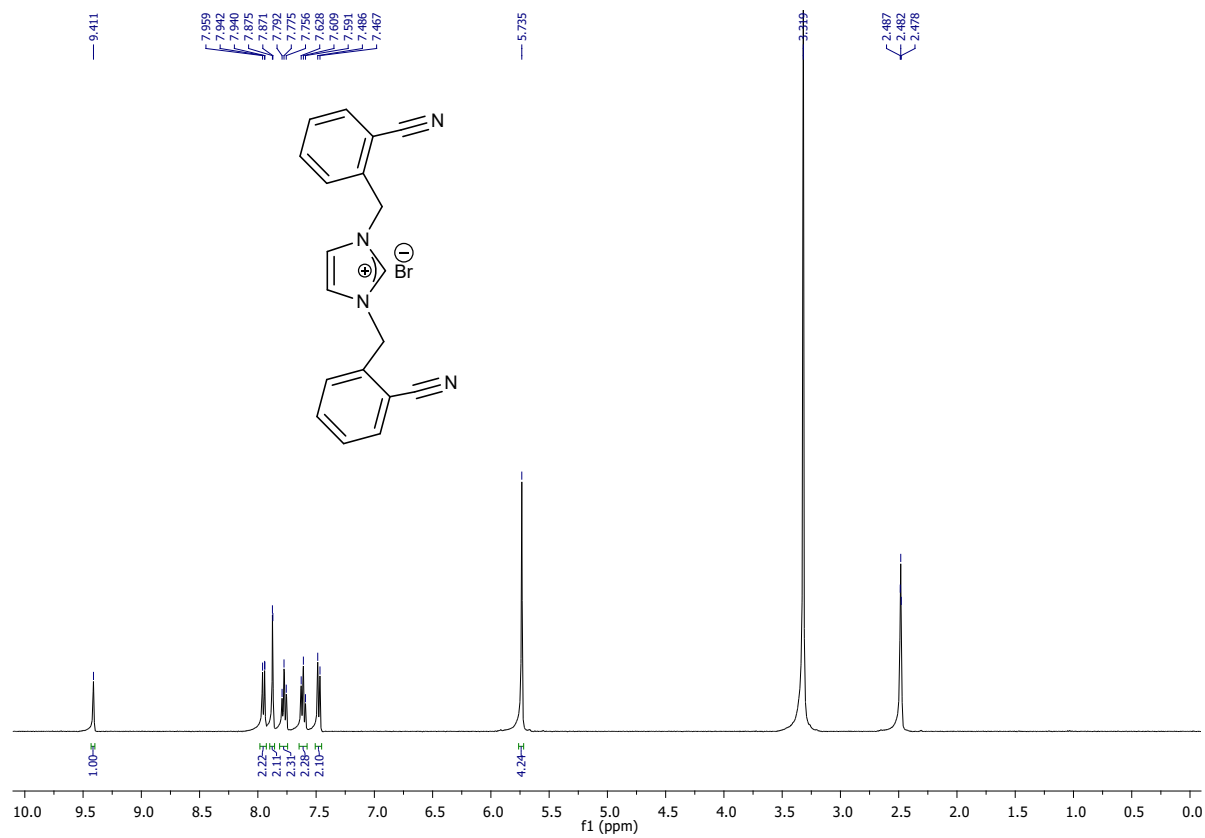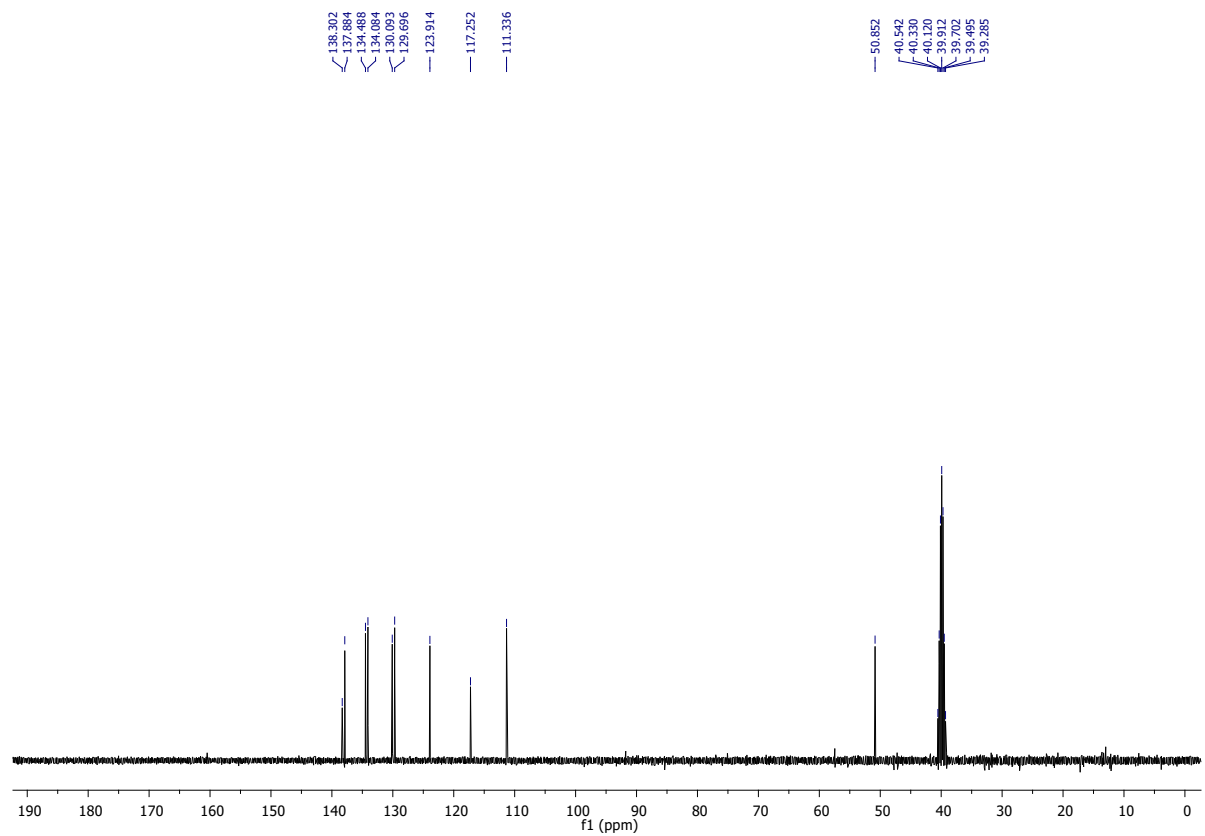

Figure S5. <sup>1</sup>H and <sup>13</sup>C NMR spectra of compound **1e** (DMSO-*d*<sub>6</sub>).

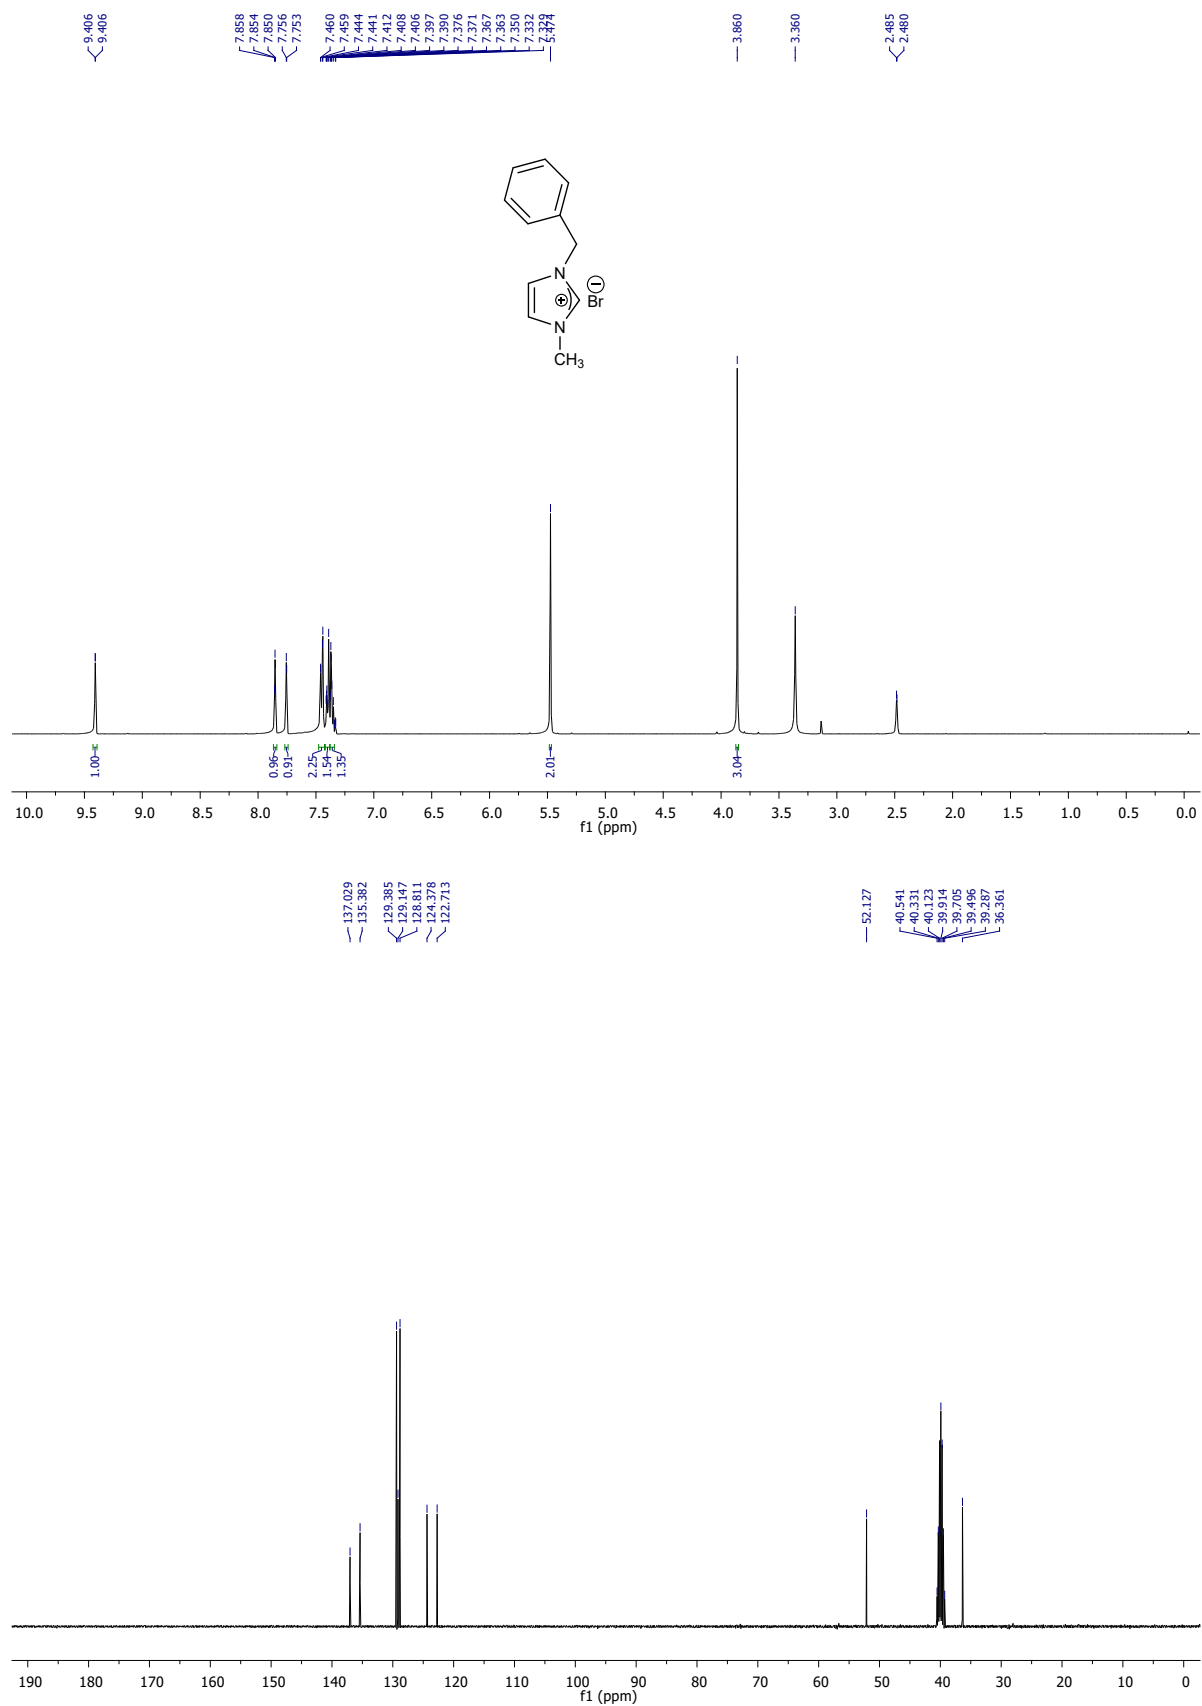

Figure S6. <sup>1</sup>H and <sup>13</sup>C spectra of compound 1f (DMSO-*d*<sub>6</sub>).

$^1\text{H}$ - and  $^{13}\text{C}$ - NMR spectra of the complexes **2a-c**, **3b-f** and **3b'**

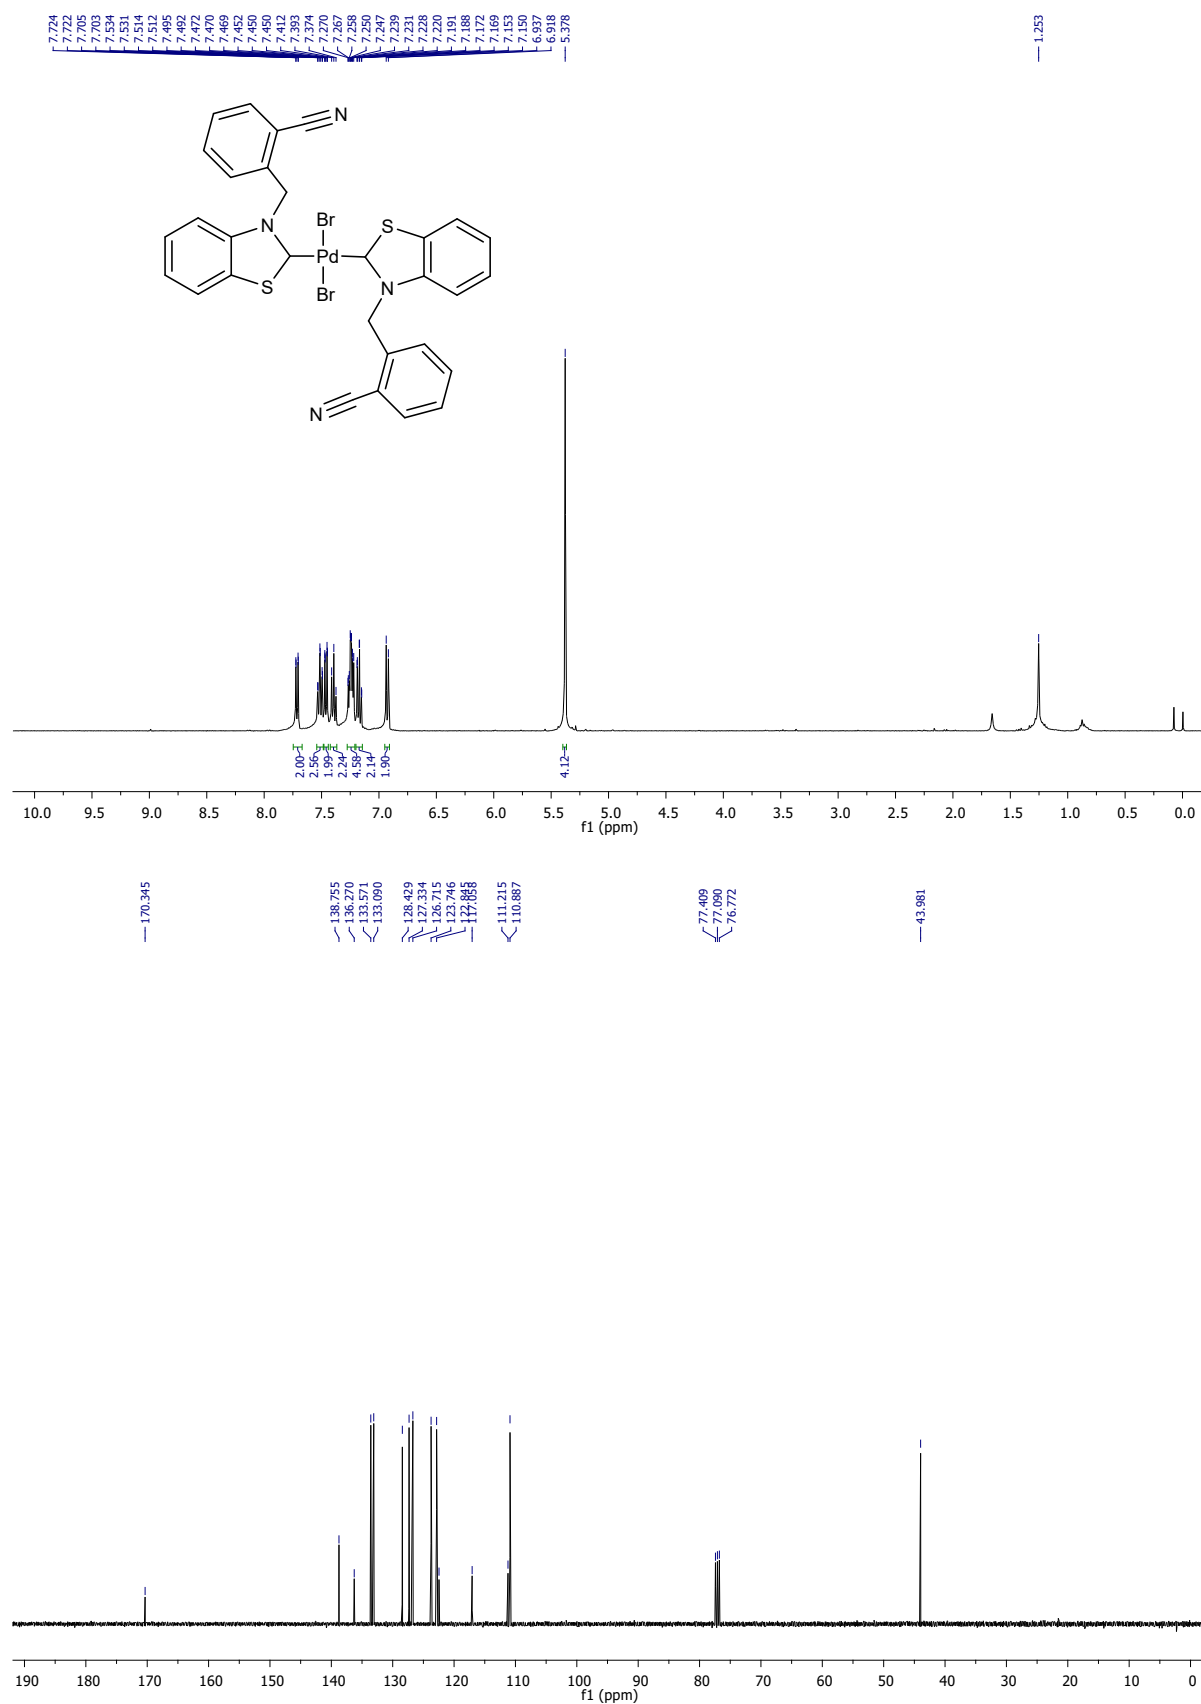

Figure S7.  $^1\text{H}$  and  $^{13}\text{C}$  NMR spectrums of complex **2a** ( $\text{CDCl}_3$ ).



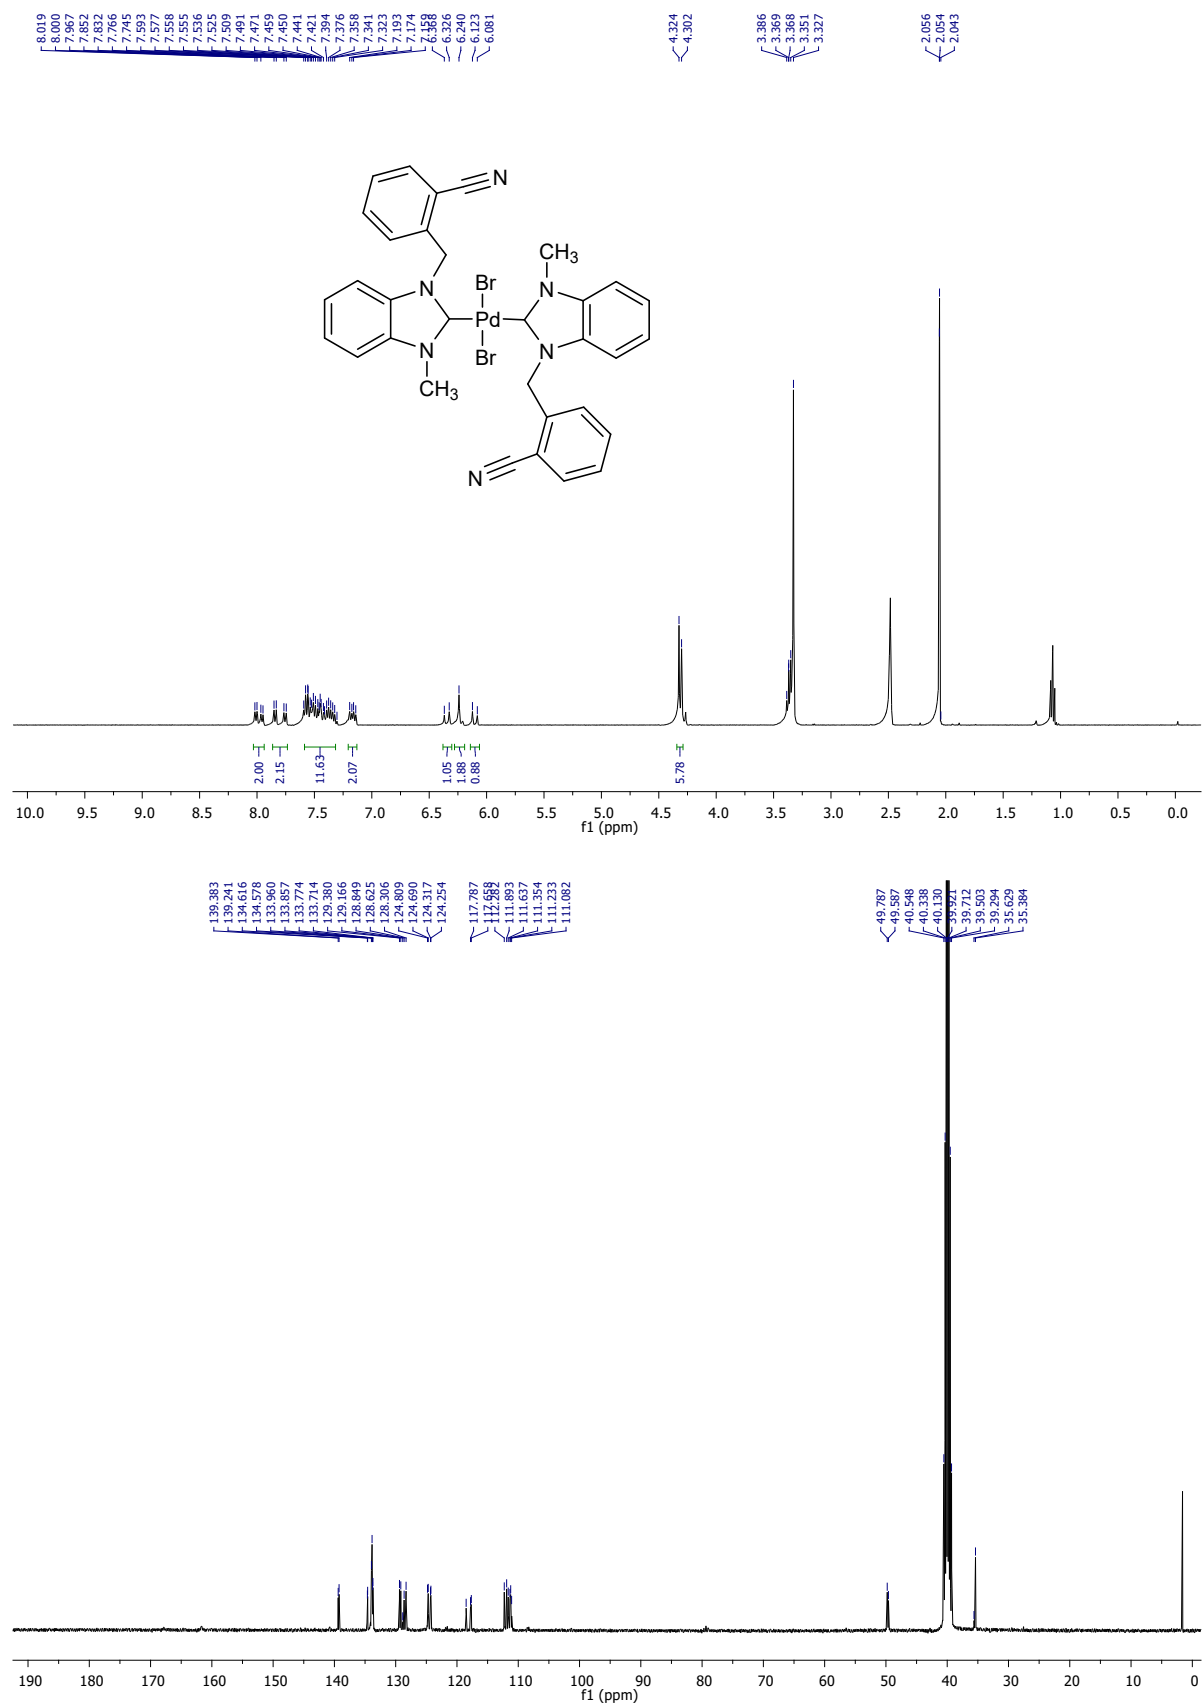

**Figure S8.** <sup>1</sup>H and <sup>13</sup>C NMR spectra of complex **2b** (DMSO-*d*<sub>6</sub>).

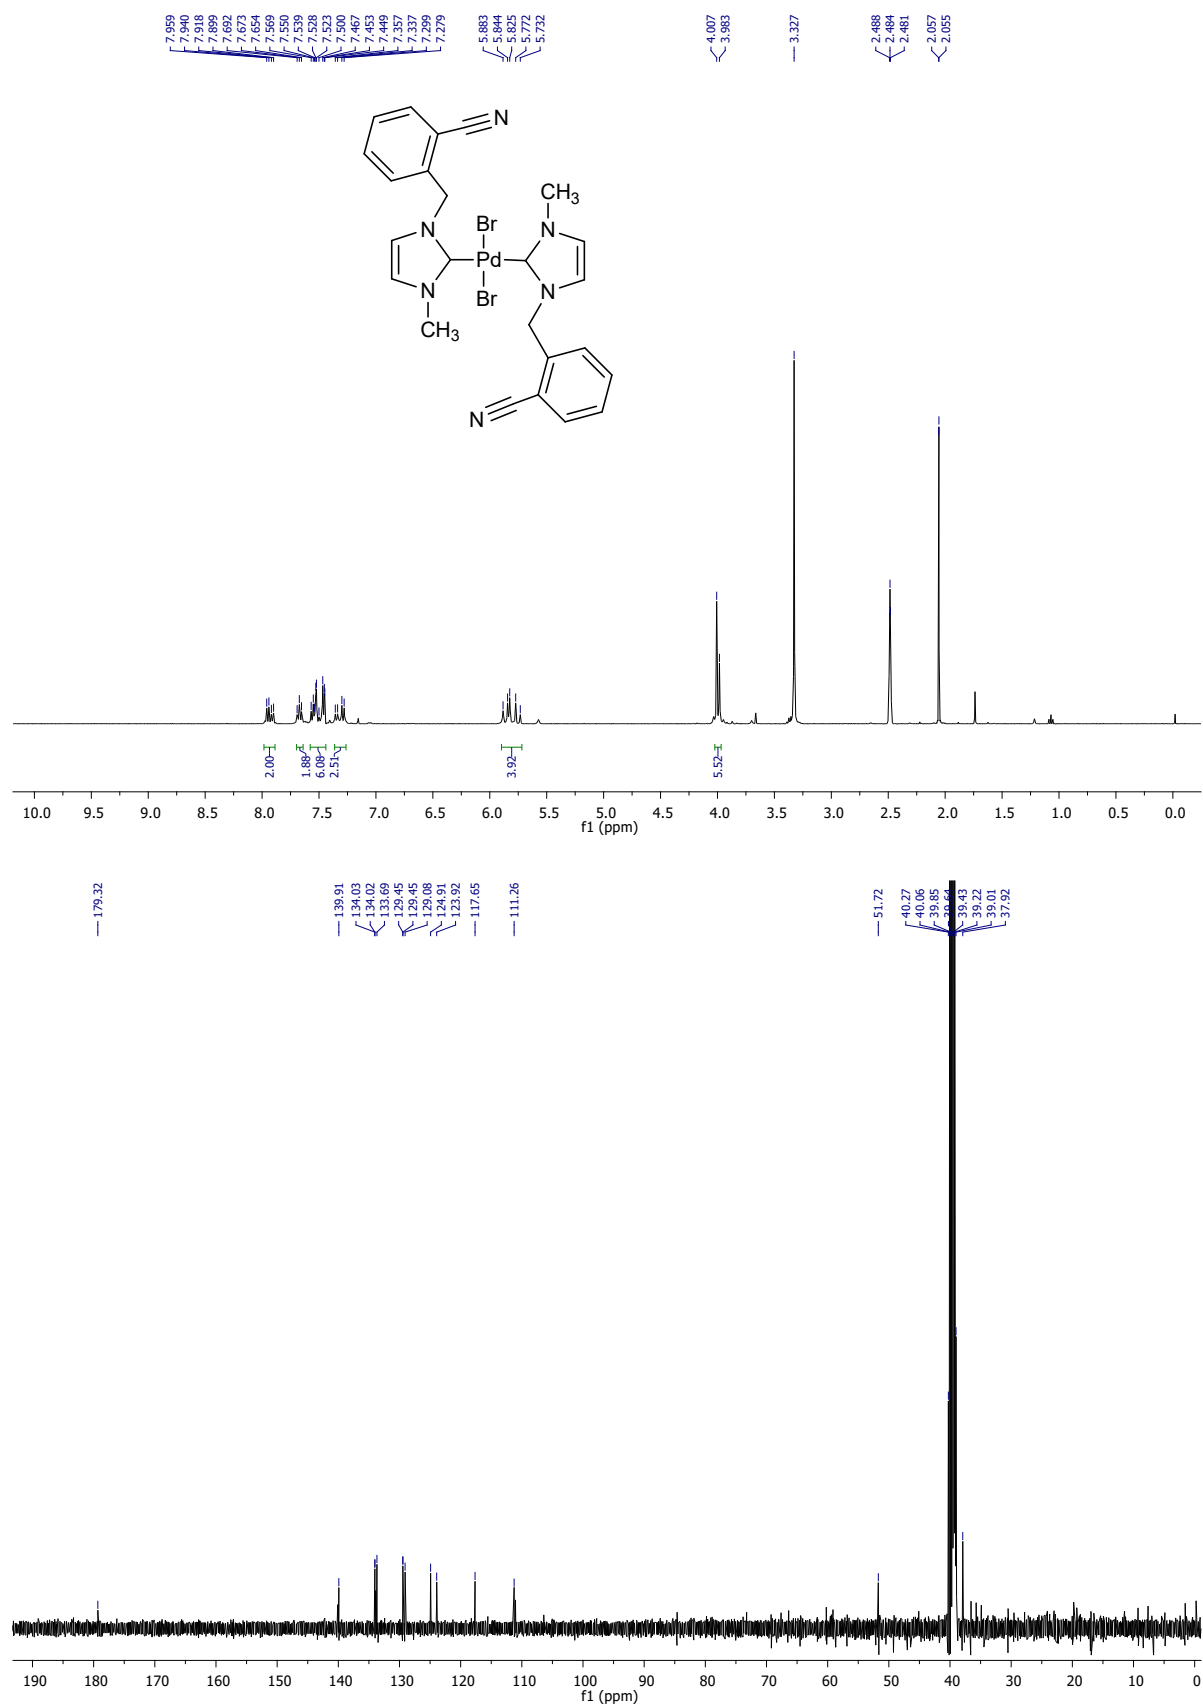

**Figure S9.** <sup>1</sup>H and <sup>13</sup>C NMR spectrums of complex **2c** (DMSO-*d*<sub>6</sub>).

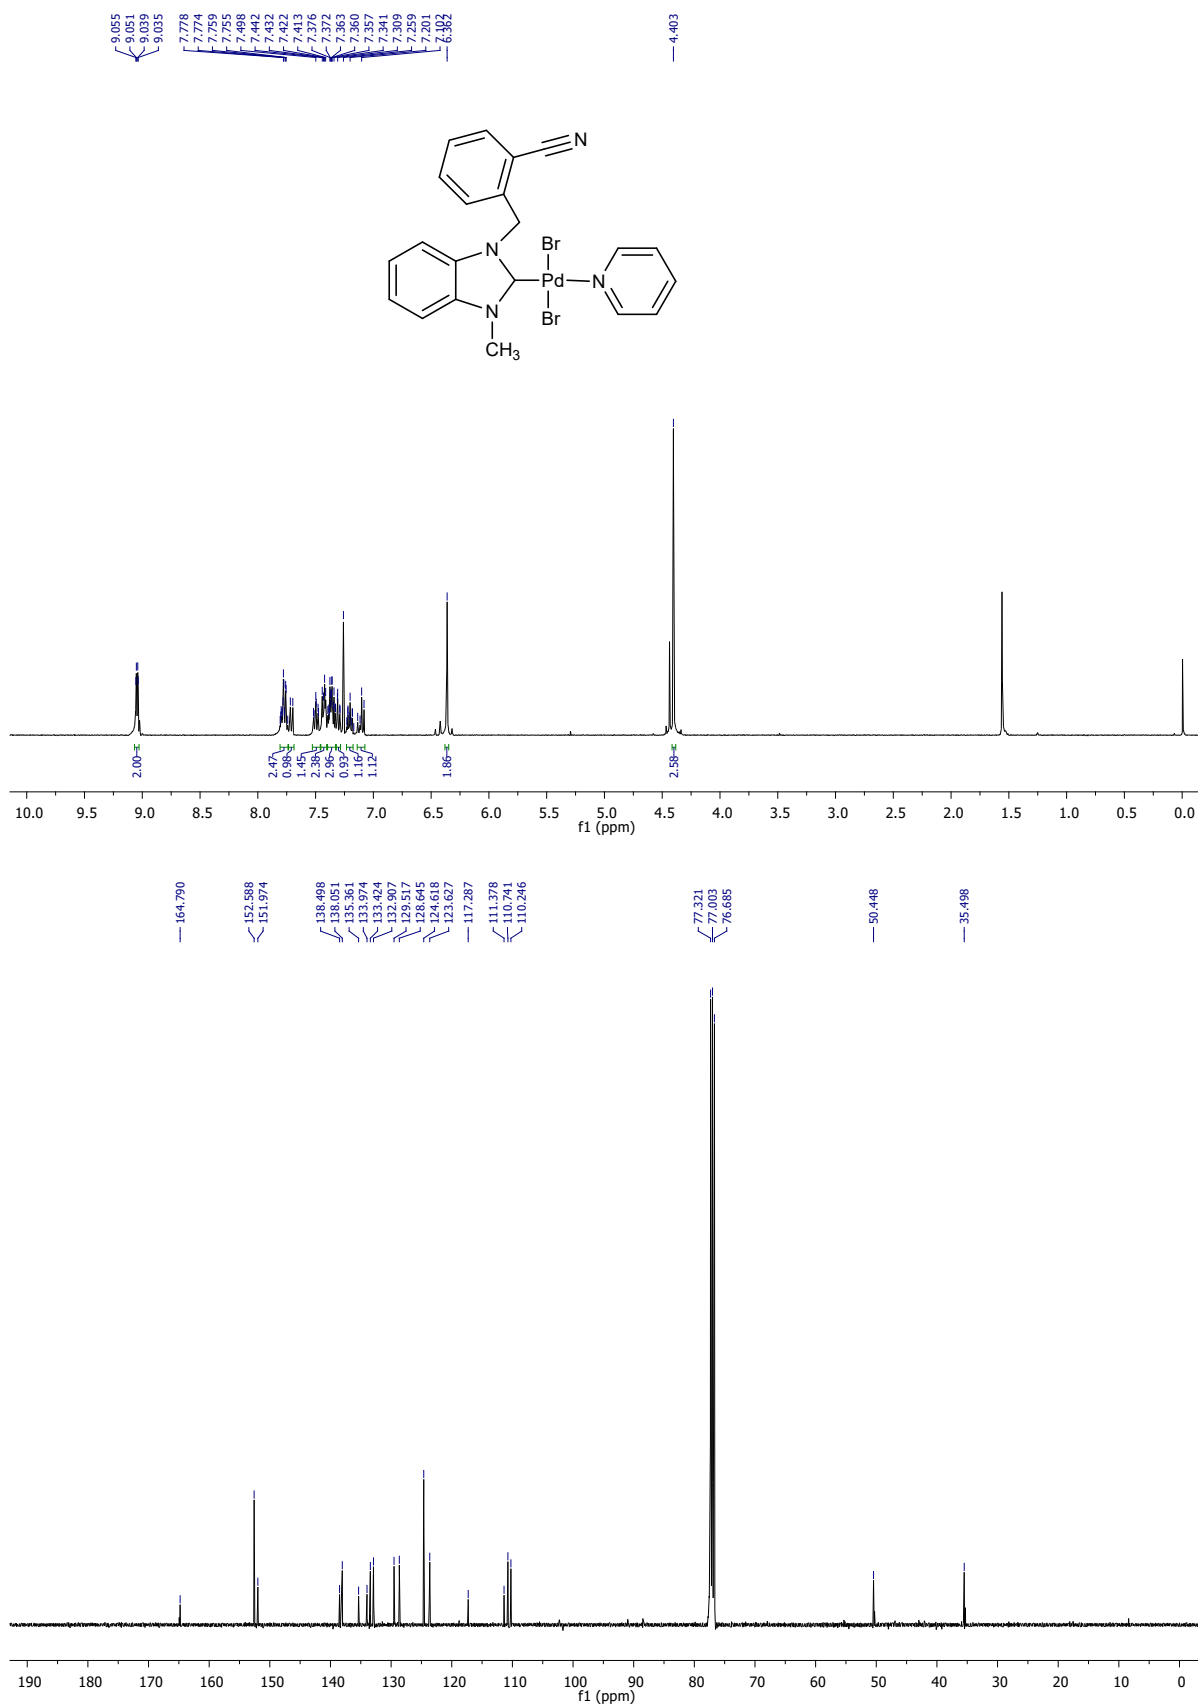

Figure S10. <sup>1</sup>H and <sup>13</sup>C NMR spectra of complex **3b** (CDCl<sub>3</sub>).

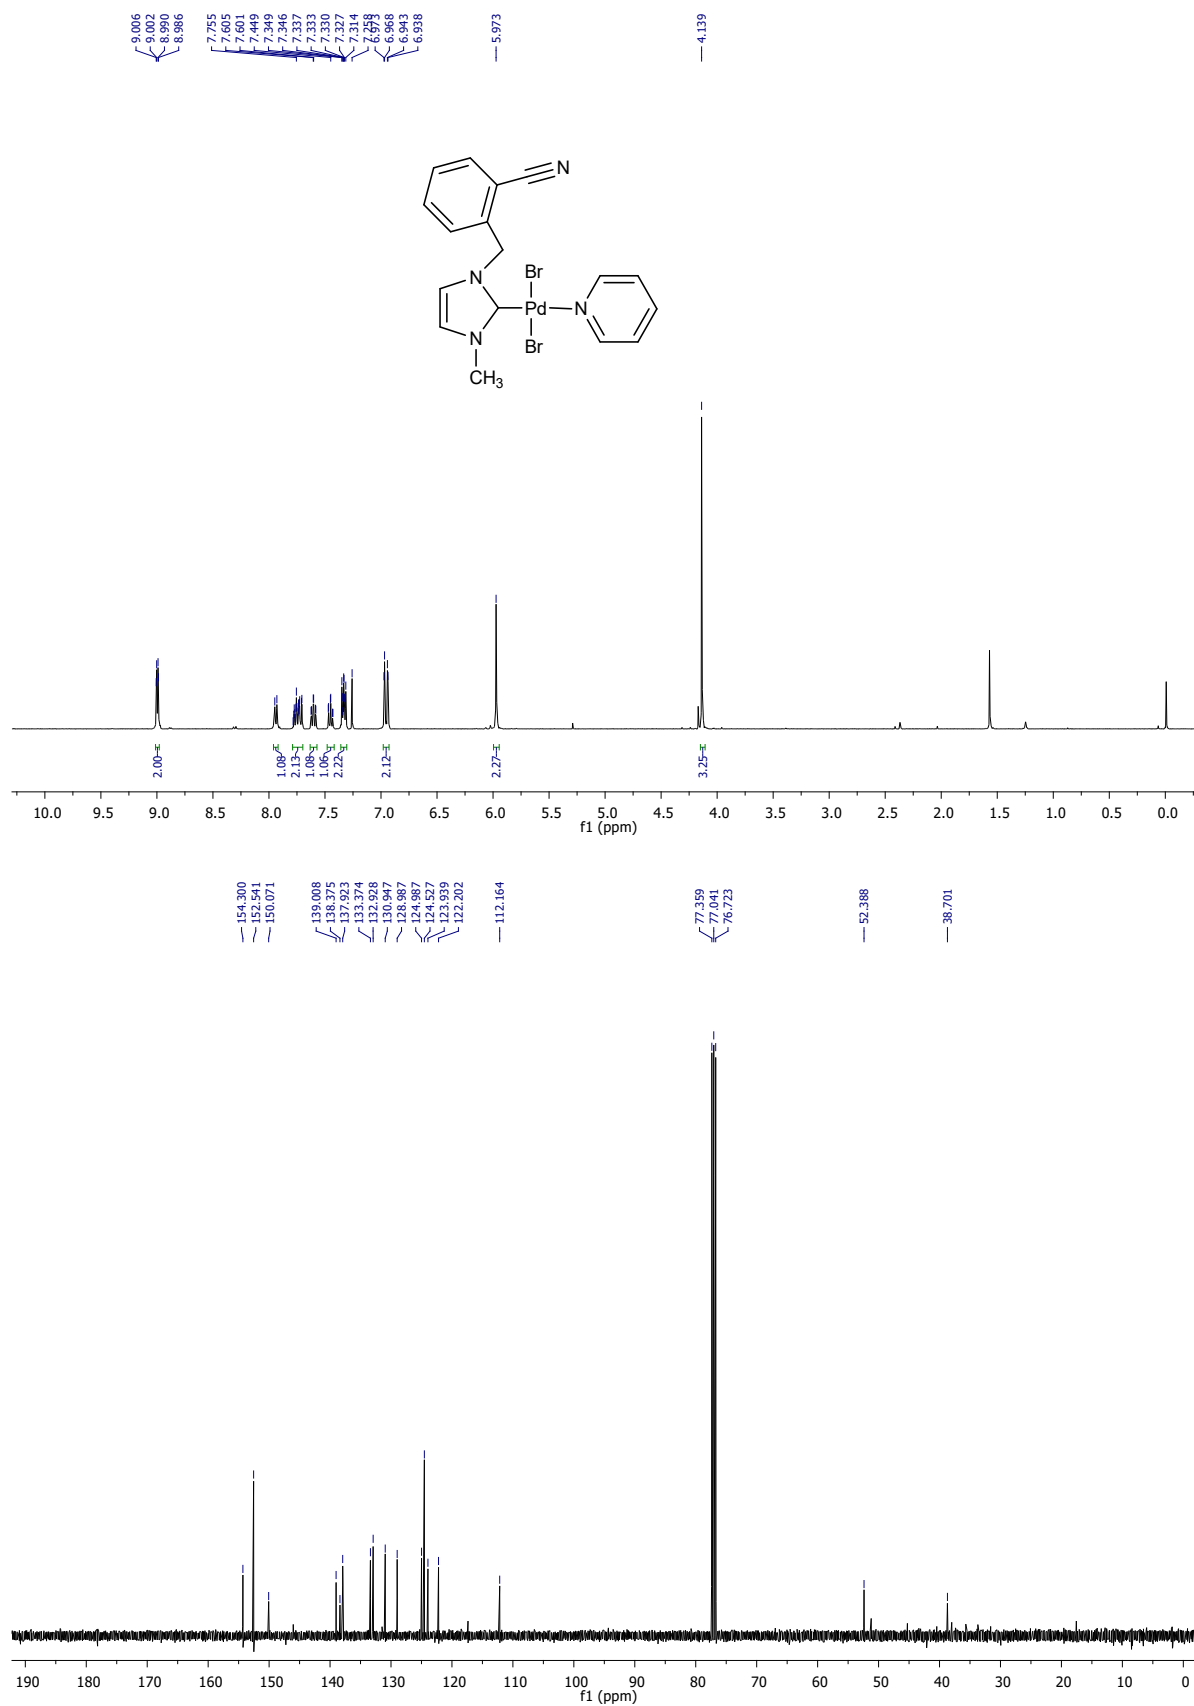

Figure S11. <sup>1</sup>H and <sup>13</sup>C NMR spectra of complex **3c** (CDCl<sub>3</sub>).

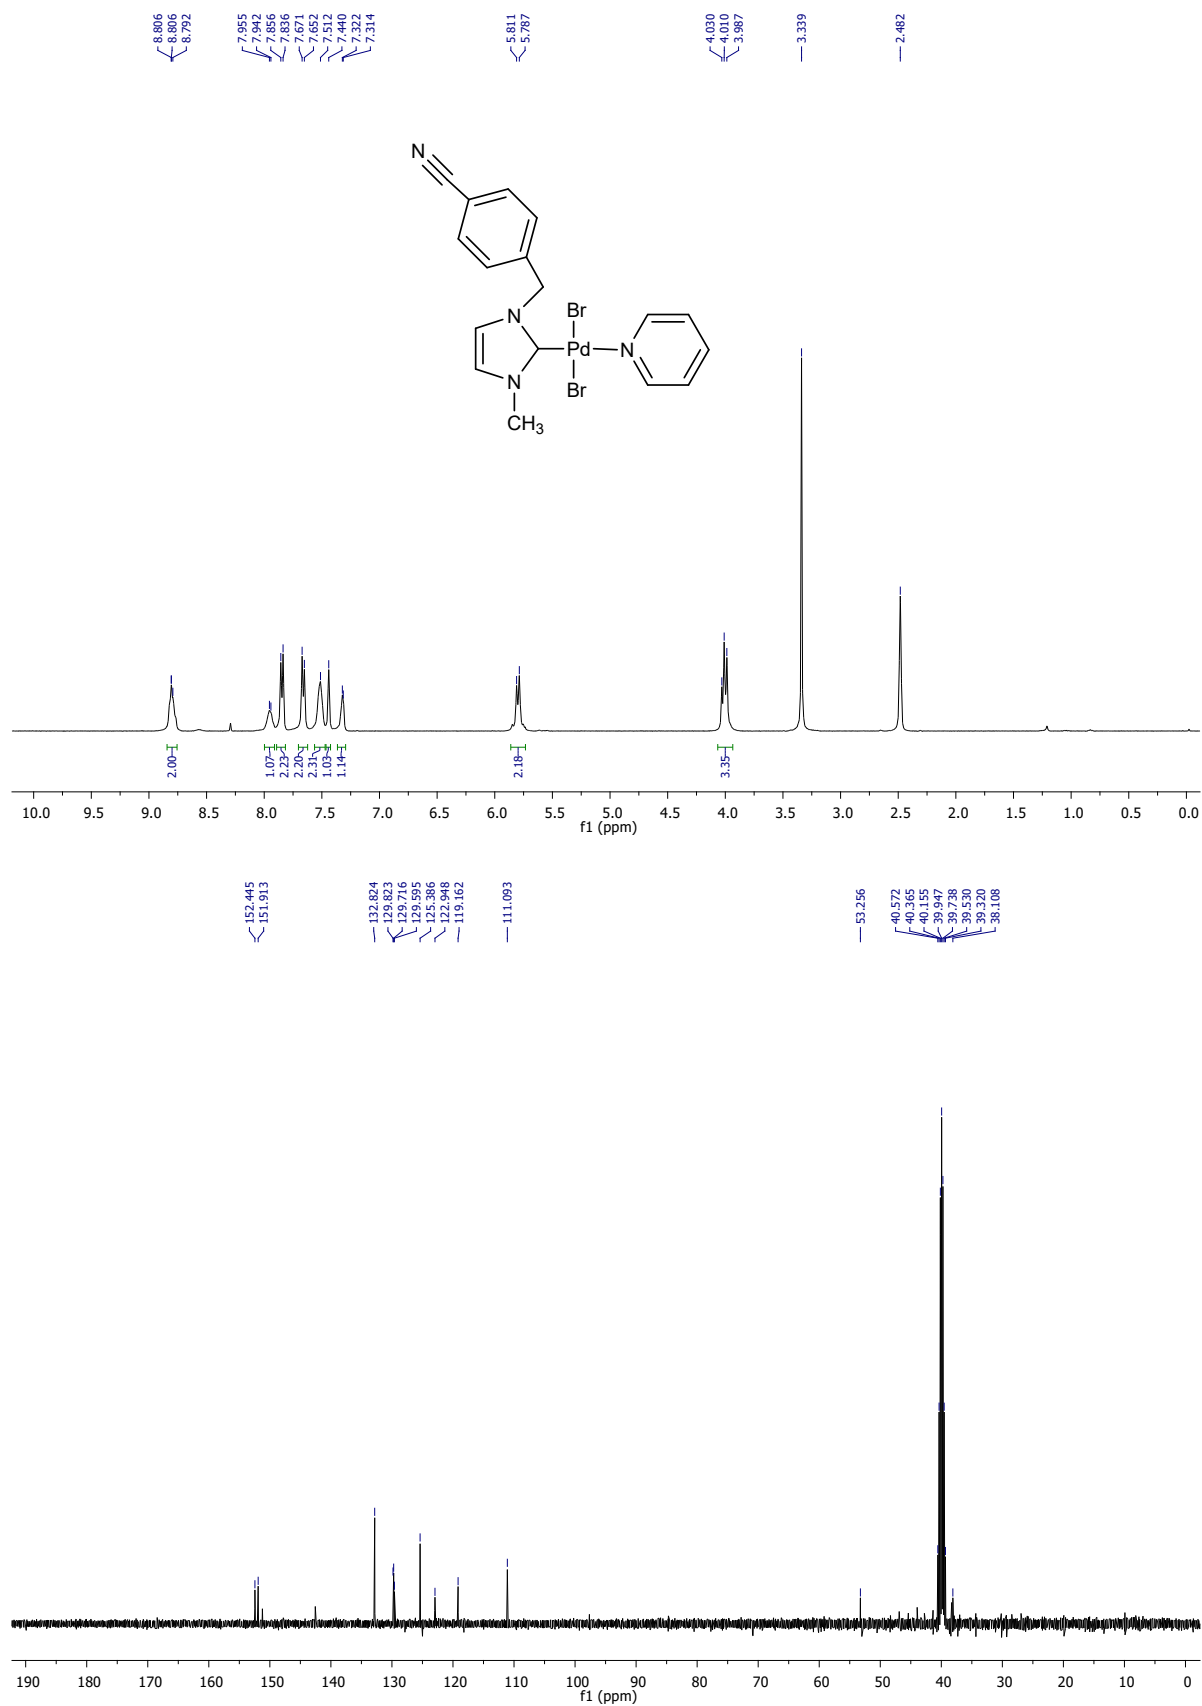

Figure S12. <sup>1</sup>H and <sup>13</sup>C NMR spectra of complex **3d** (DMSO-*d*<sub>6</sub>).

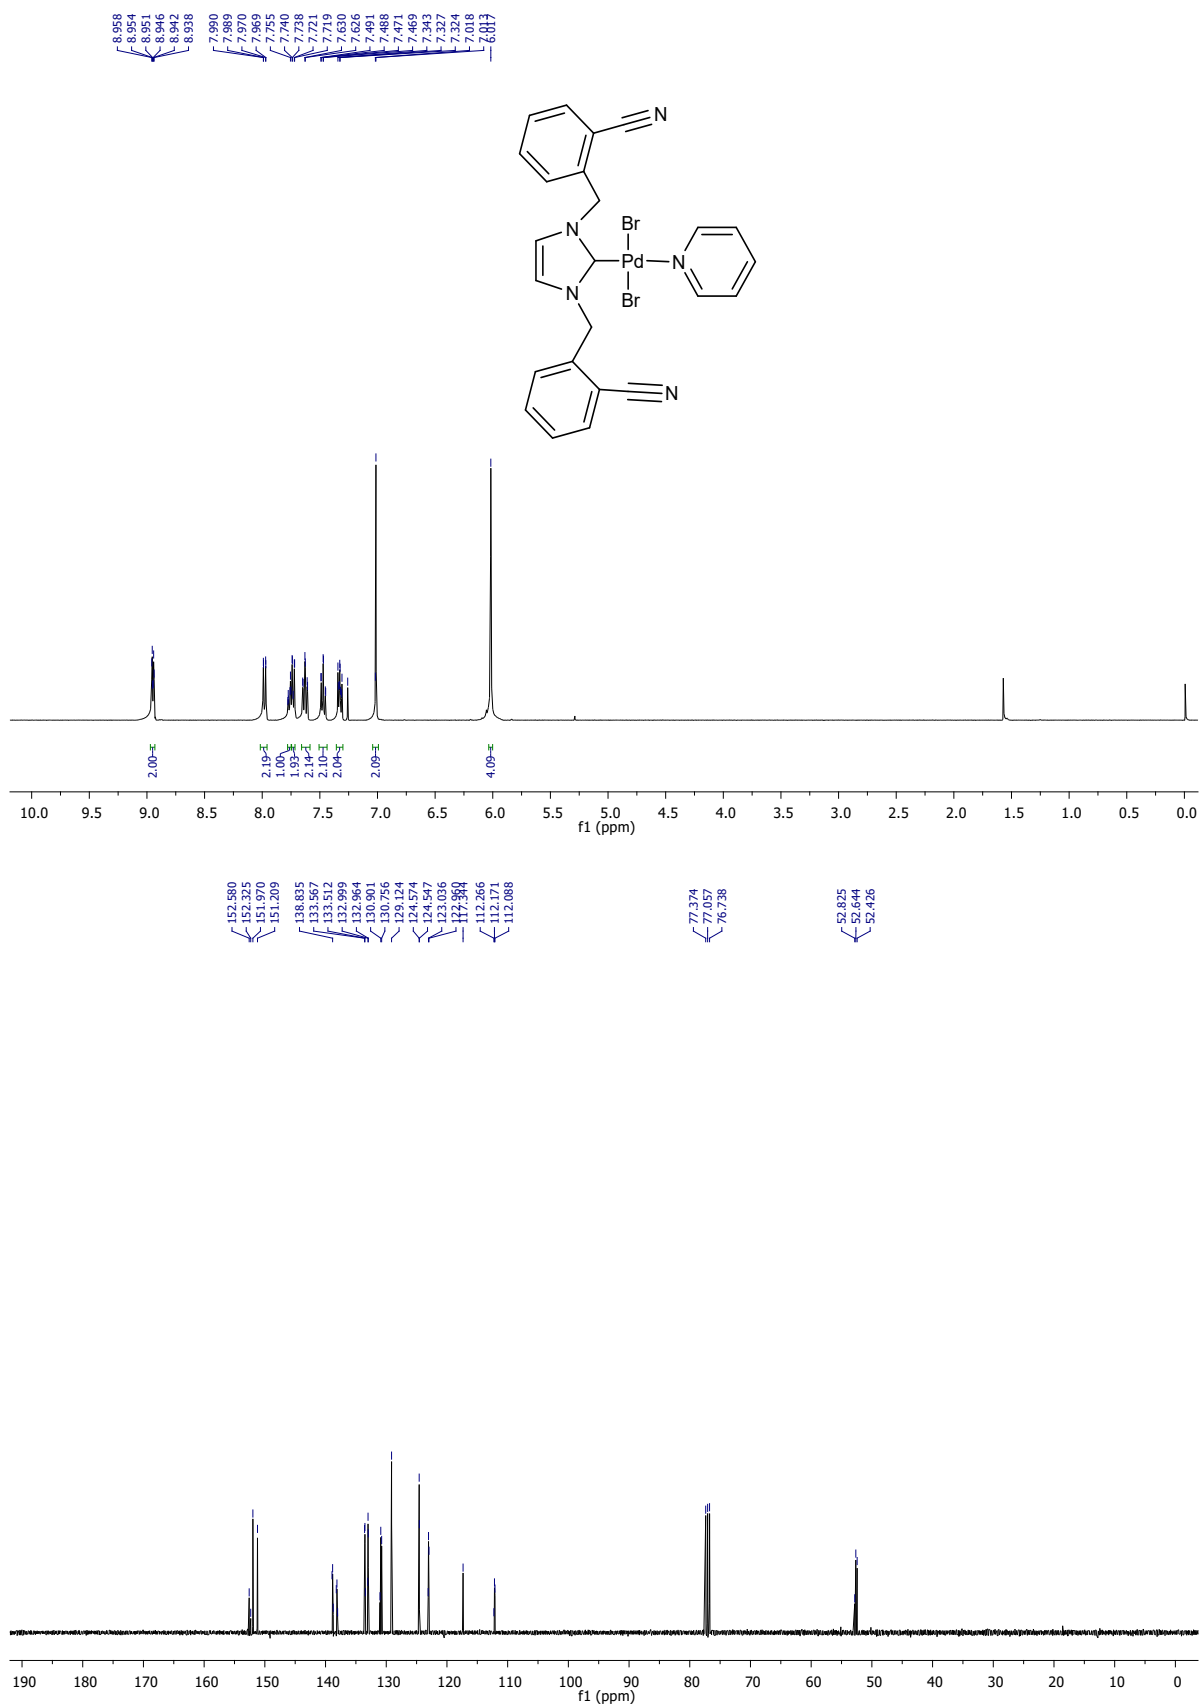

Figure S13. <sup>1</sup>H and <sup>13</sup>C NMR spectra of complex **3e** (CDCl<sub>3</sub>).

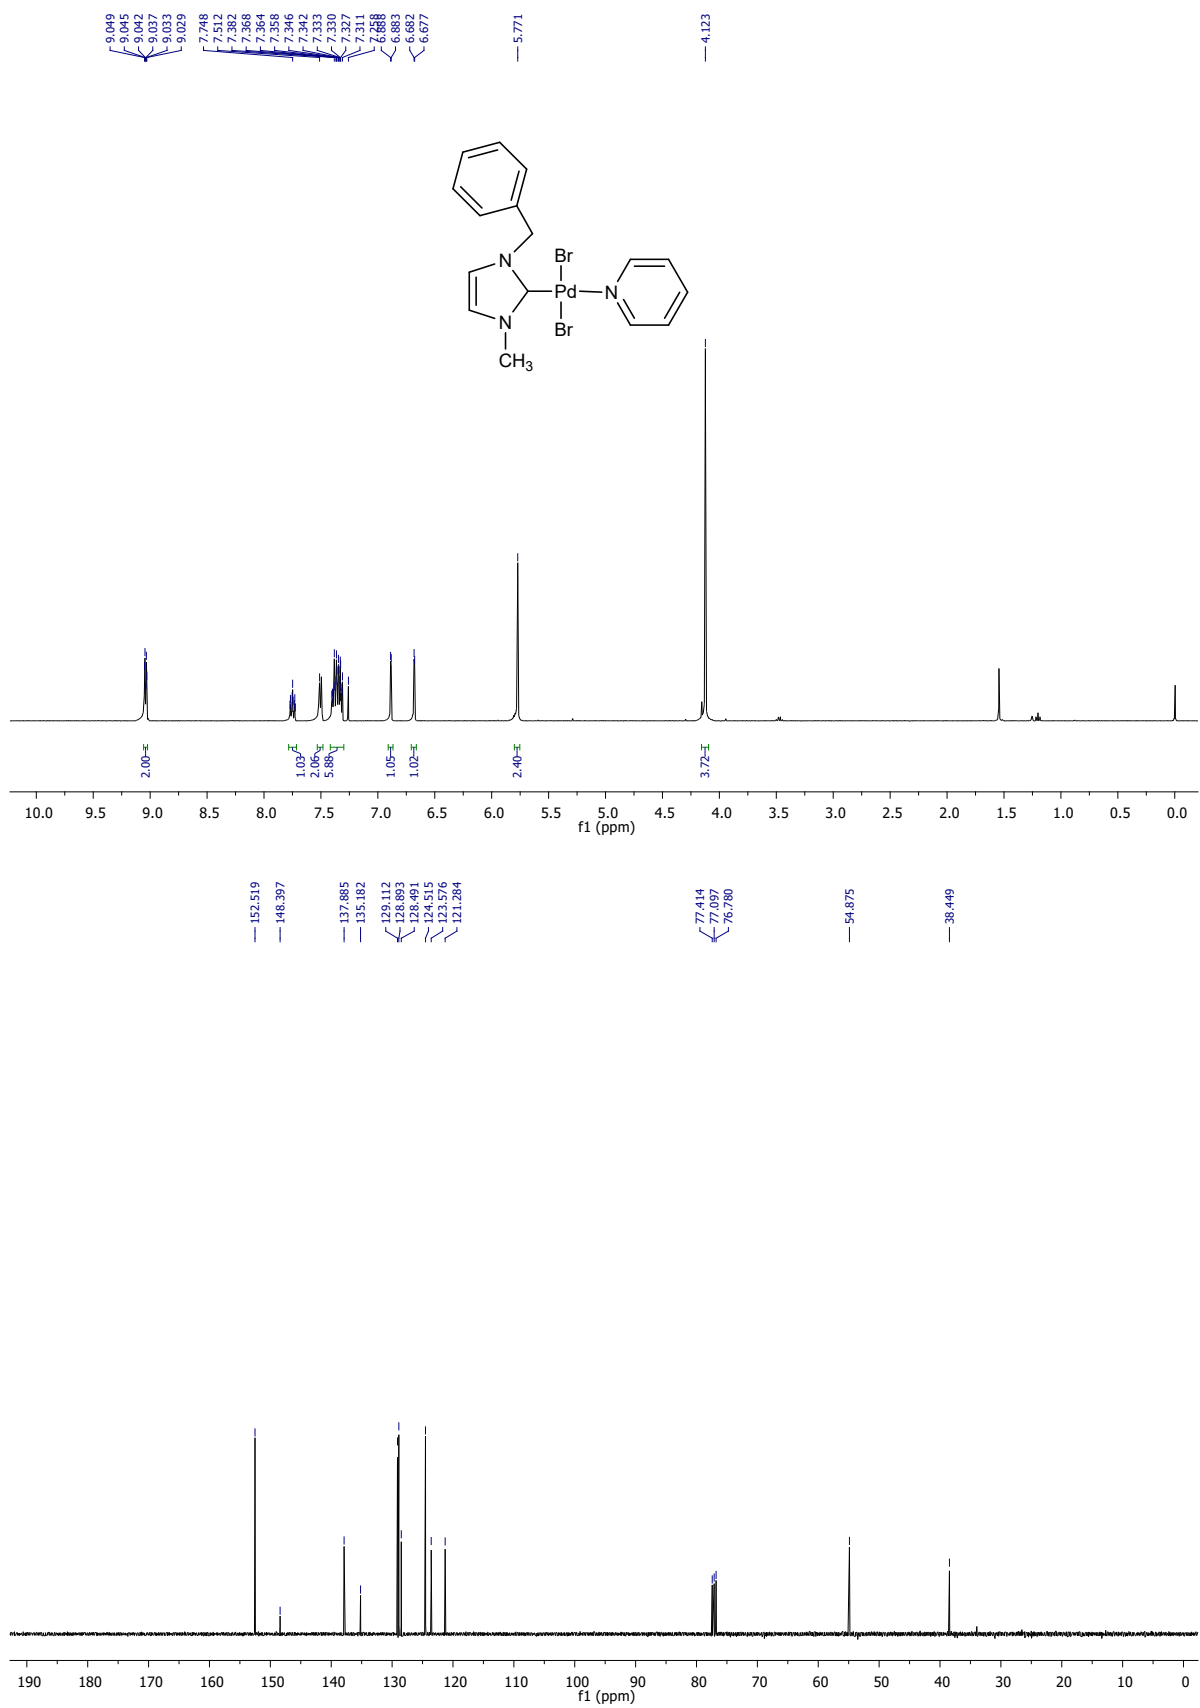

Figure S14. <sup>1</sup>H and <sup>13</sup>C NMR spectrums of complex **3f** (CDCl<sub>3</sub>).

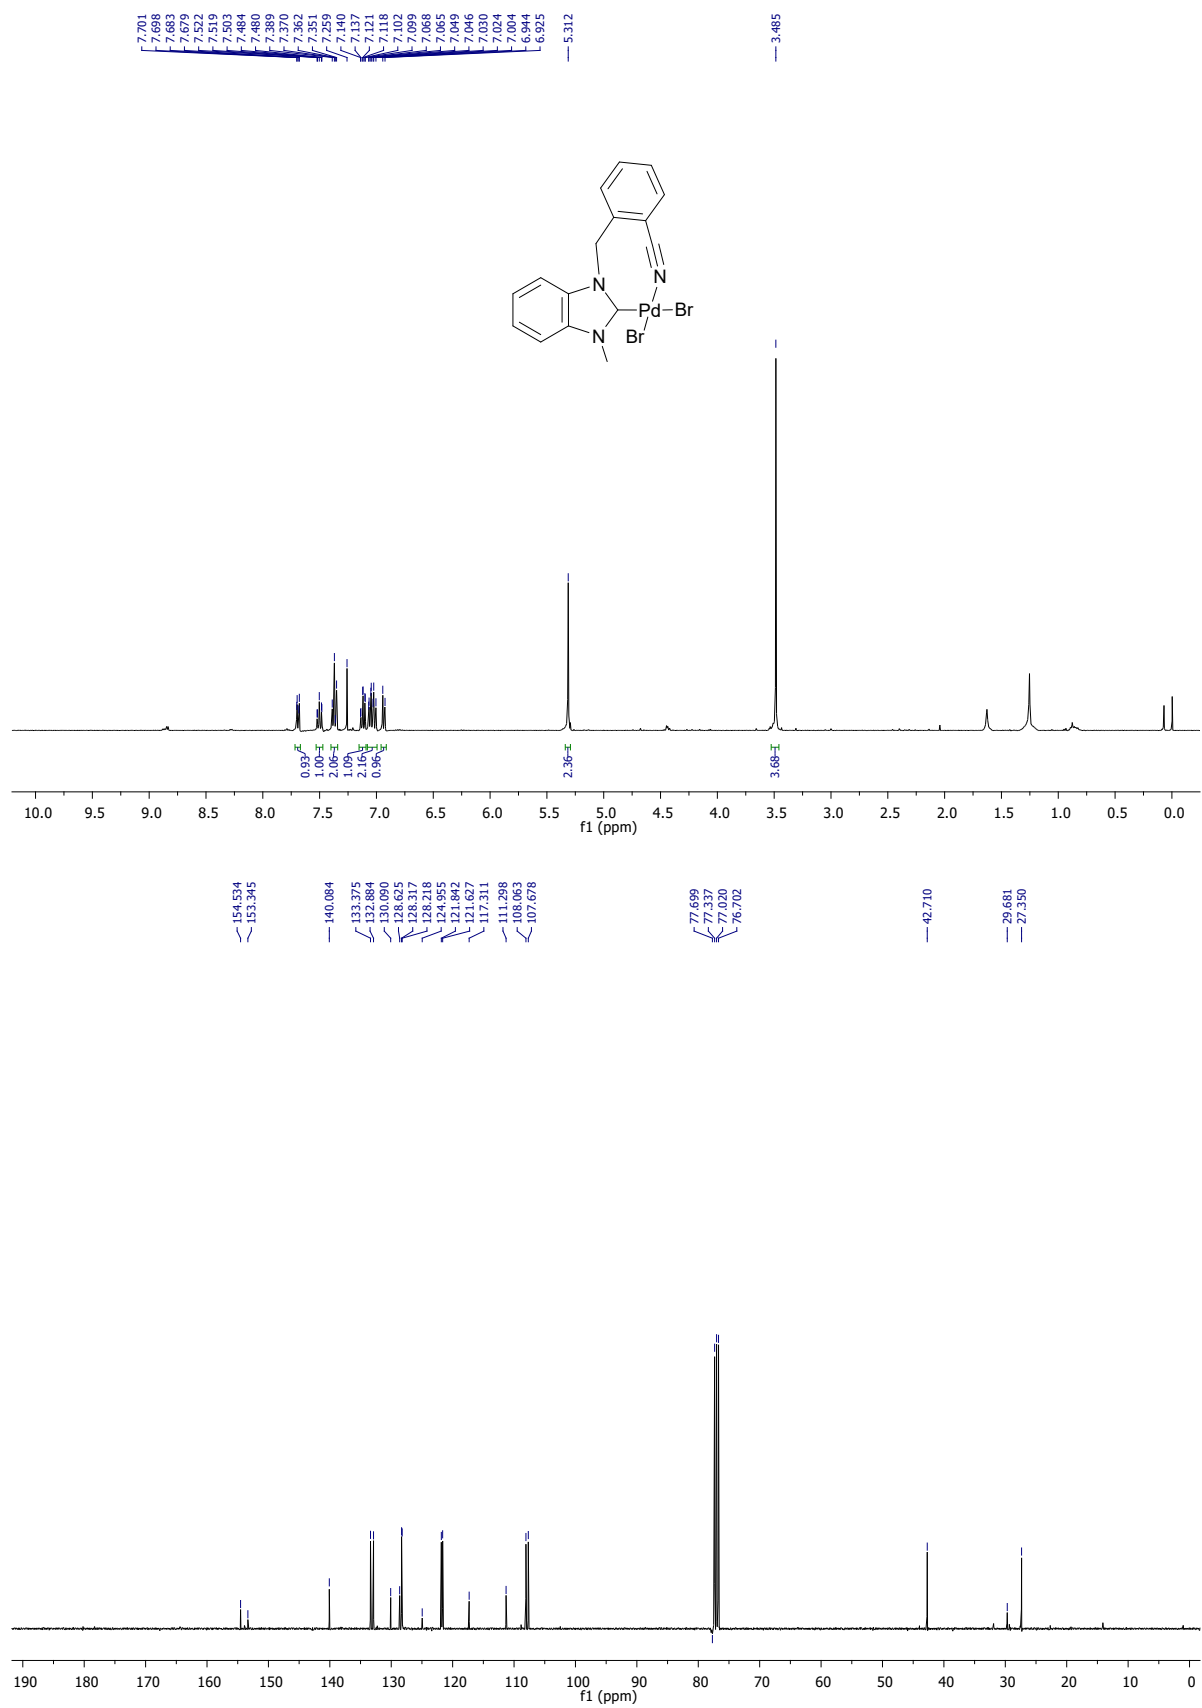

Figure S15. <sup>1</sup>H and <sup>13</sup>C NMR spectra of complex **3b'** (CDCl<sub>3</sub>).



# $^1\text{H}$ - and $^{13}\text{C}$ - NMR spectras of Acylative Suzuki products

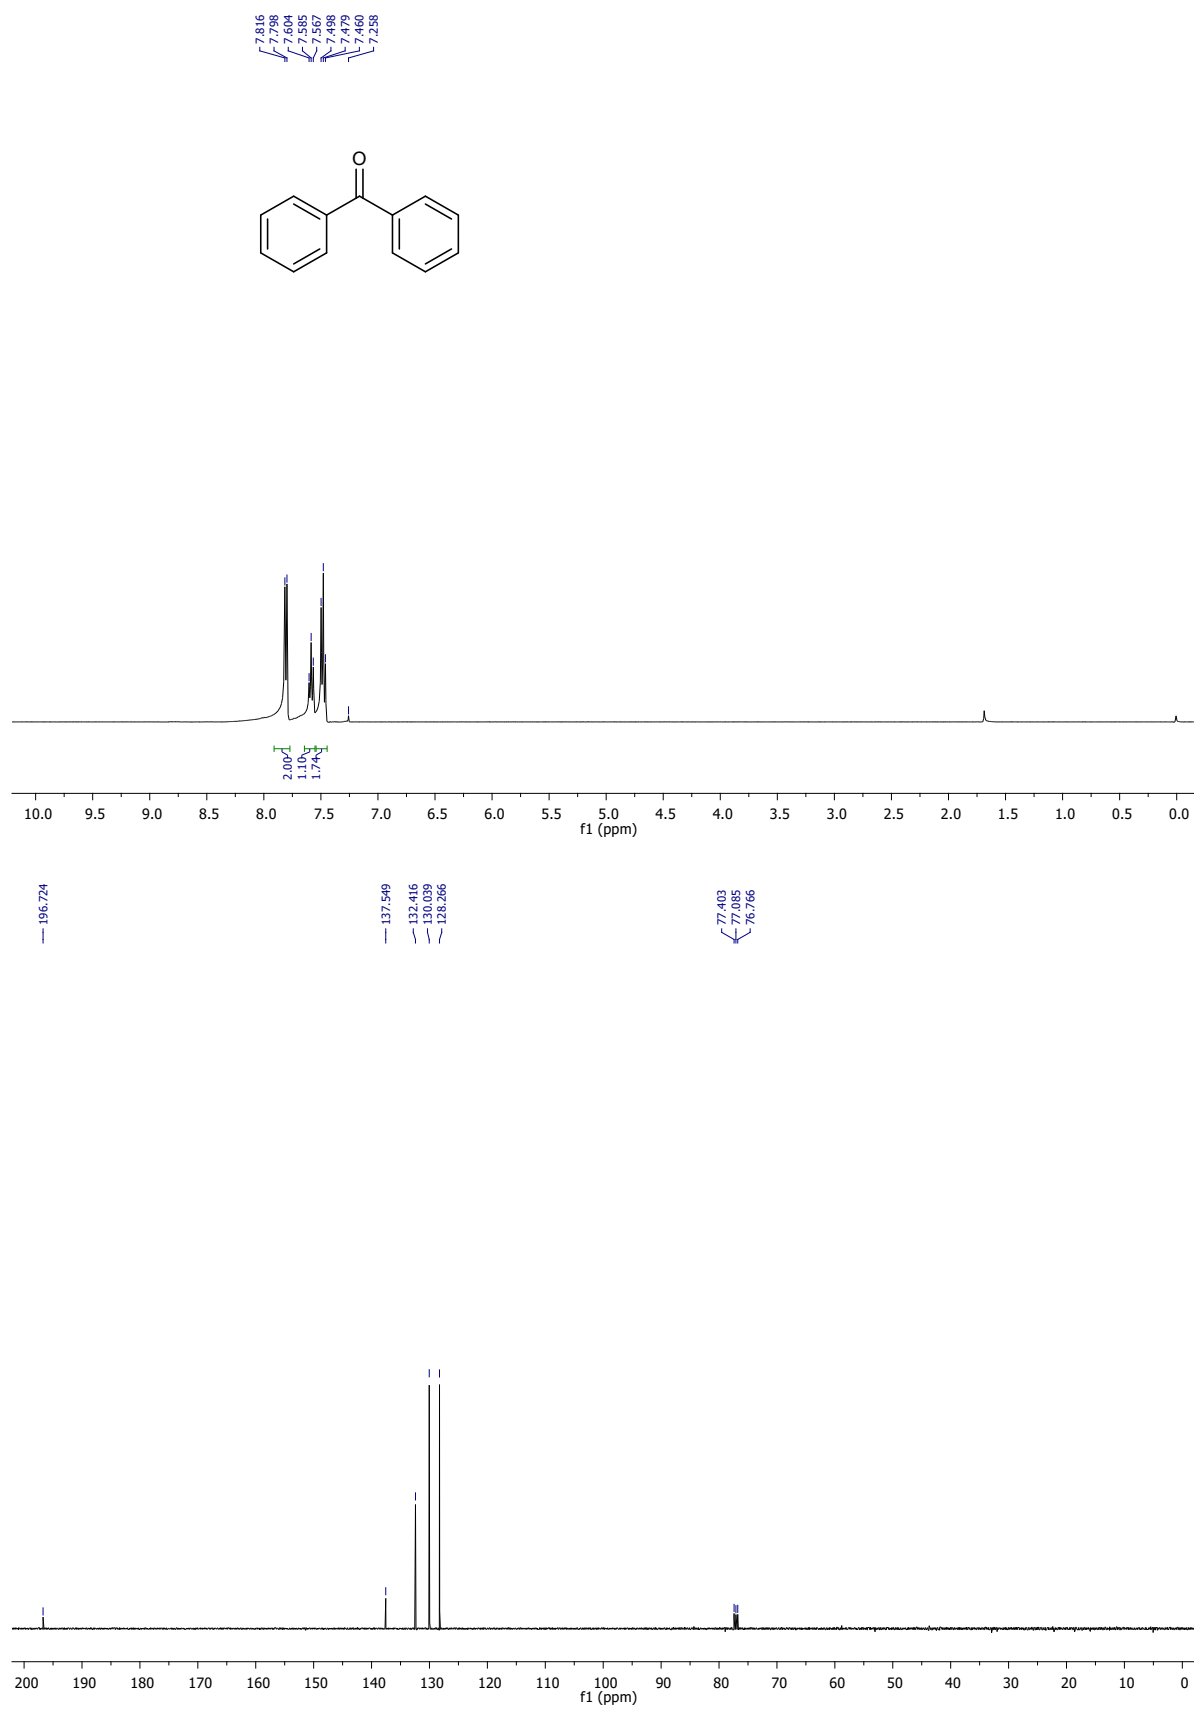

Figure S16.  $^1\text{H}$  and  $^{13}\text{C}$  NMR spectras of Benzophenone ( $\text{CDCl}_3$ ).

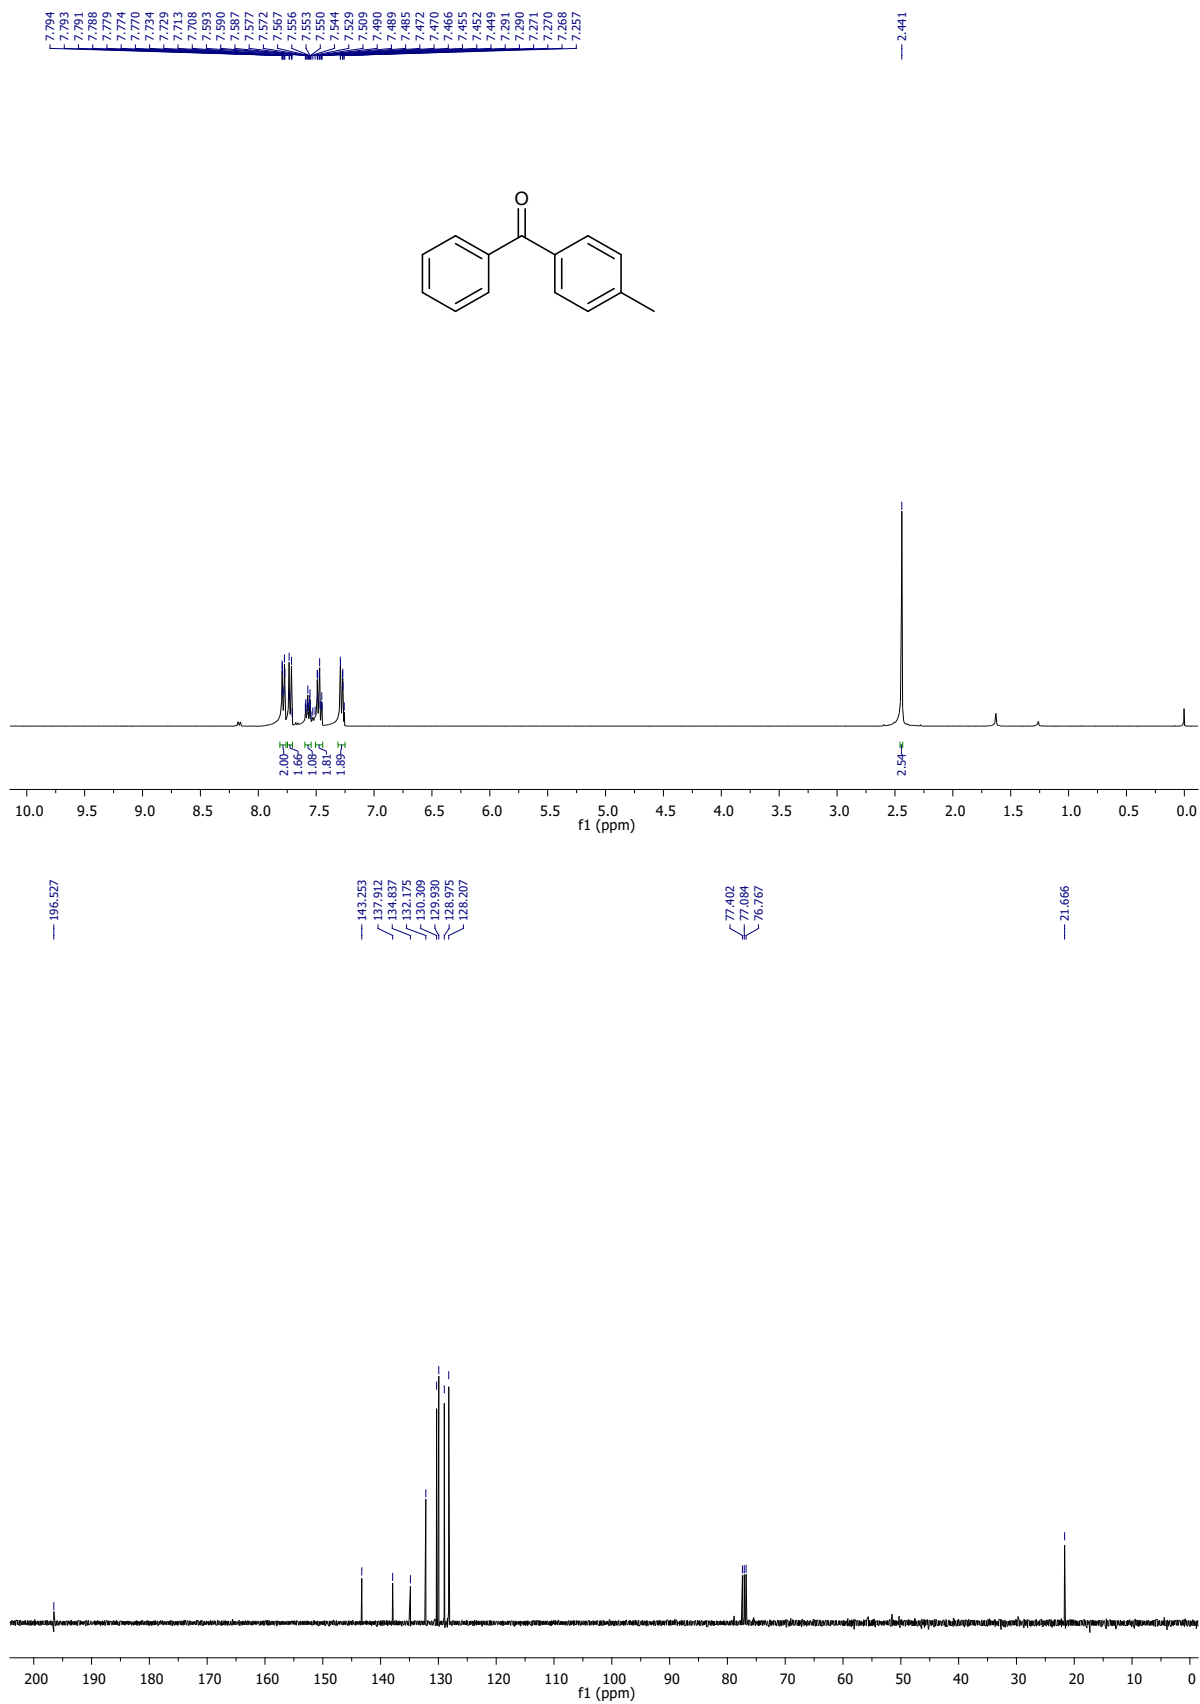

Figure S17. <sup>1</sup>H and <sup>13</sup>C NMR spectra of 4-Methylbenzophenone (CDCl<sub>3</sub>).

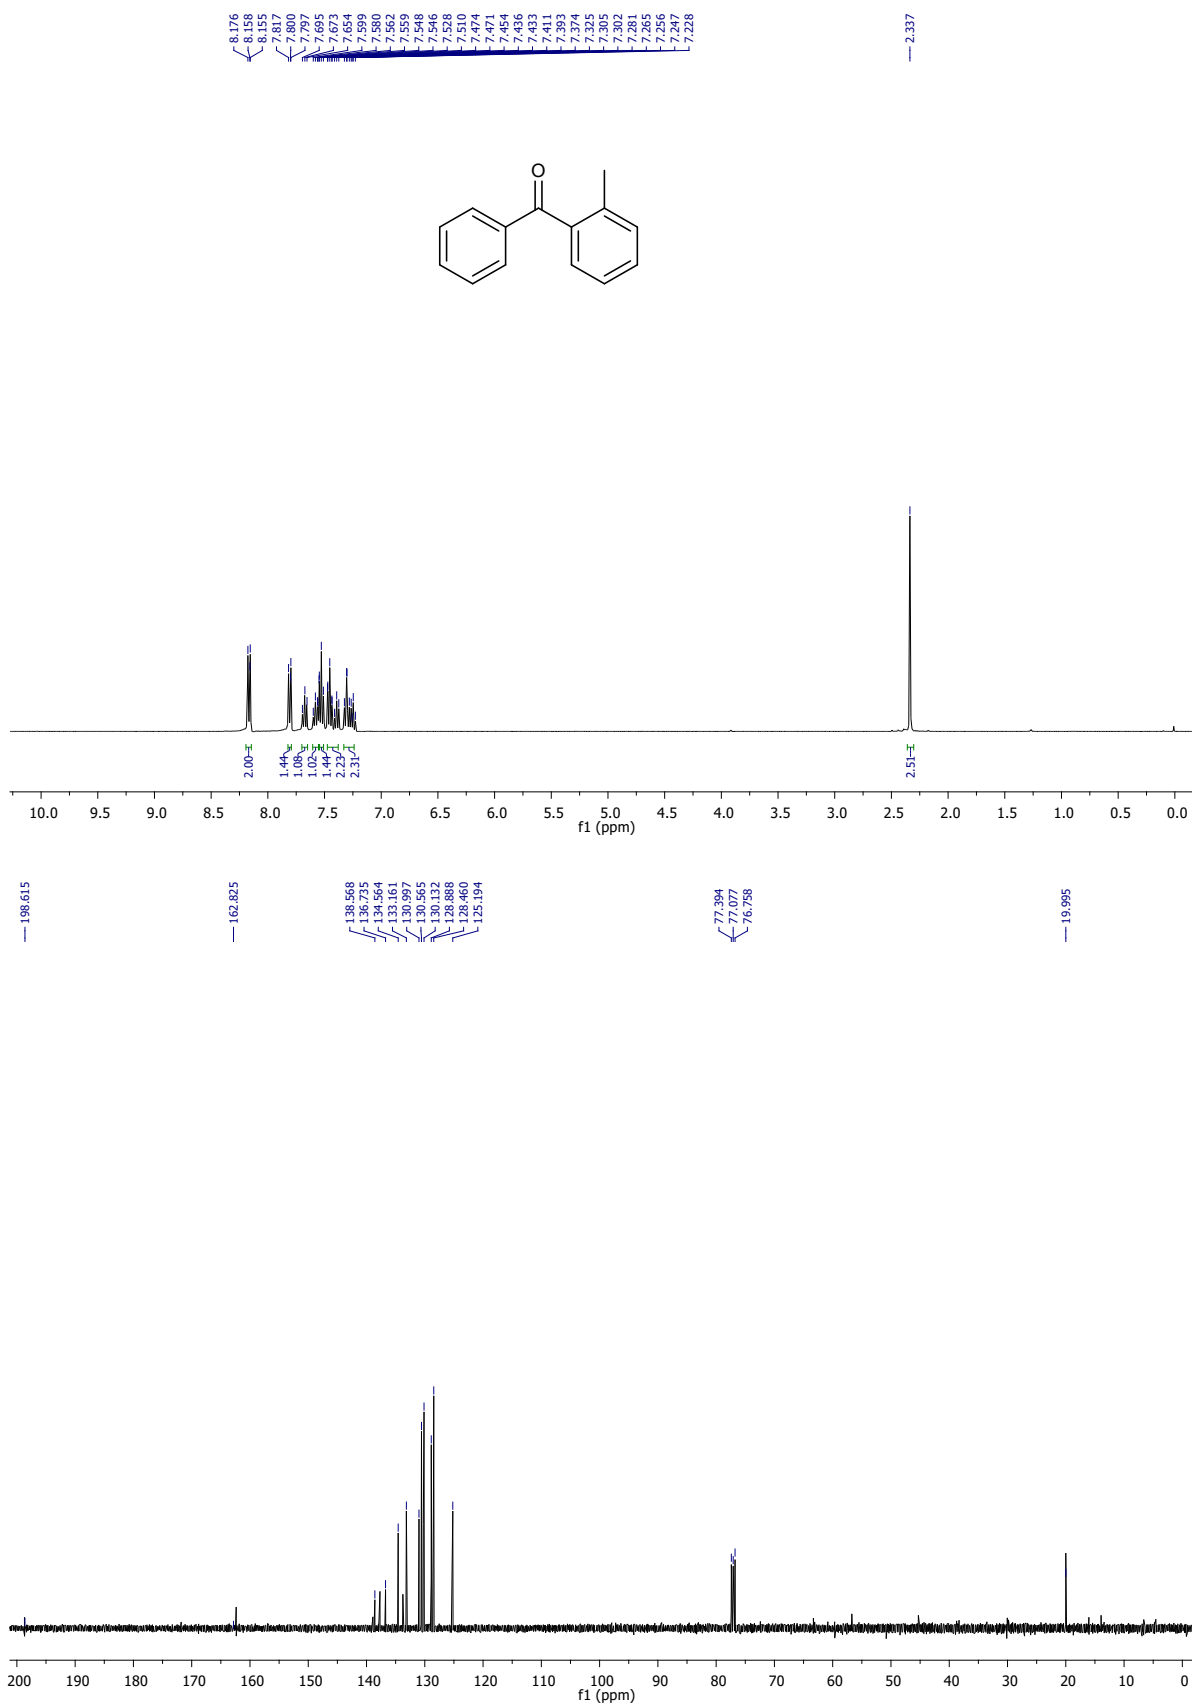

Figure S18.  $^1\text{H}$  and  $^{13}\text{C}$  NMR spectra of 2-Methylbenzophenone ( $\text{CDCl}_3$ ).

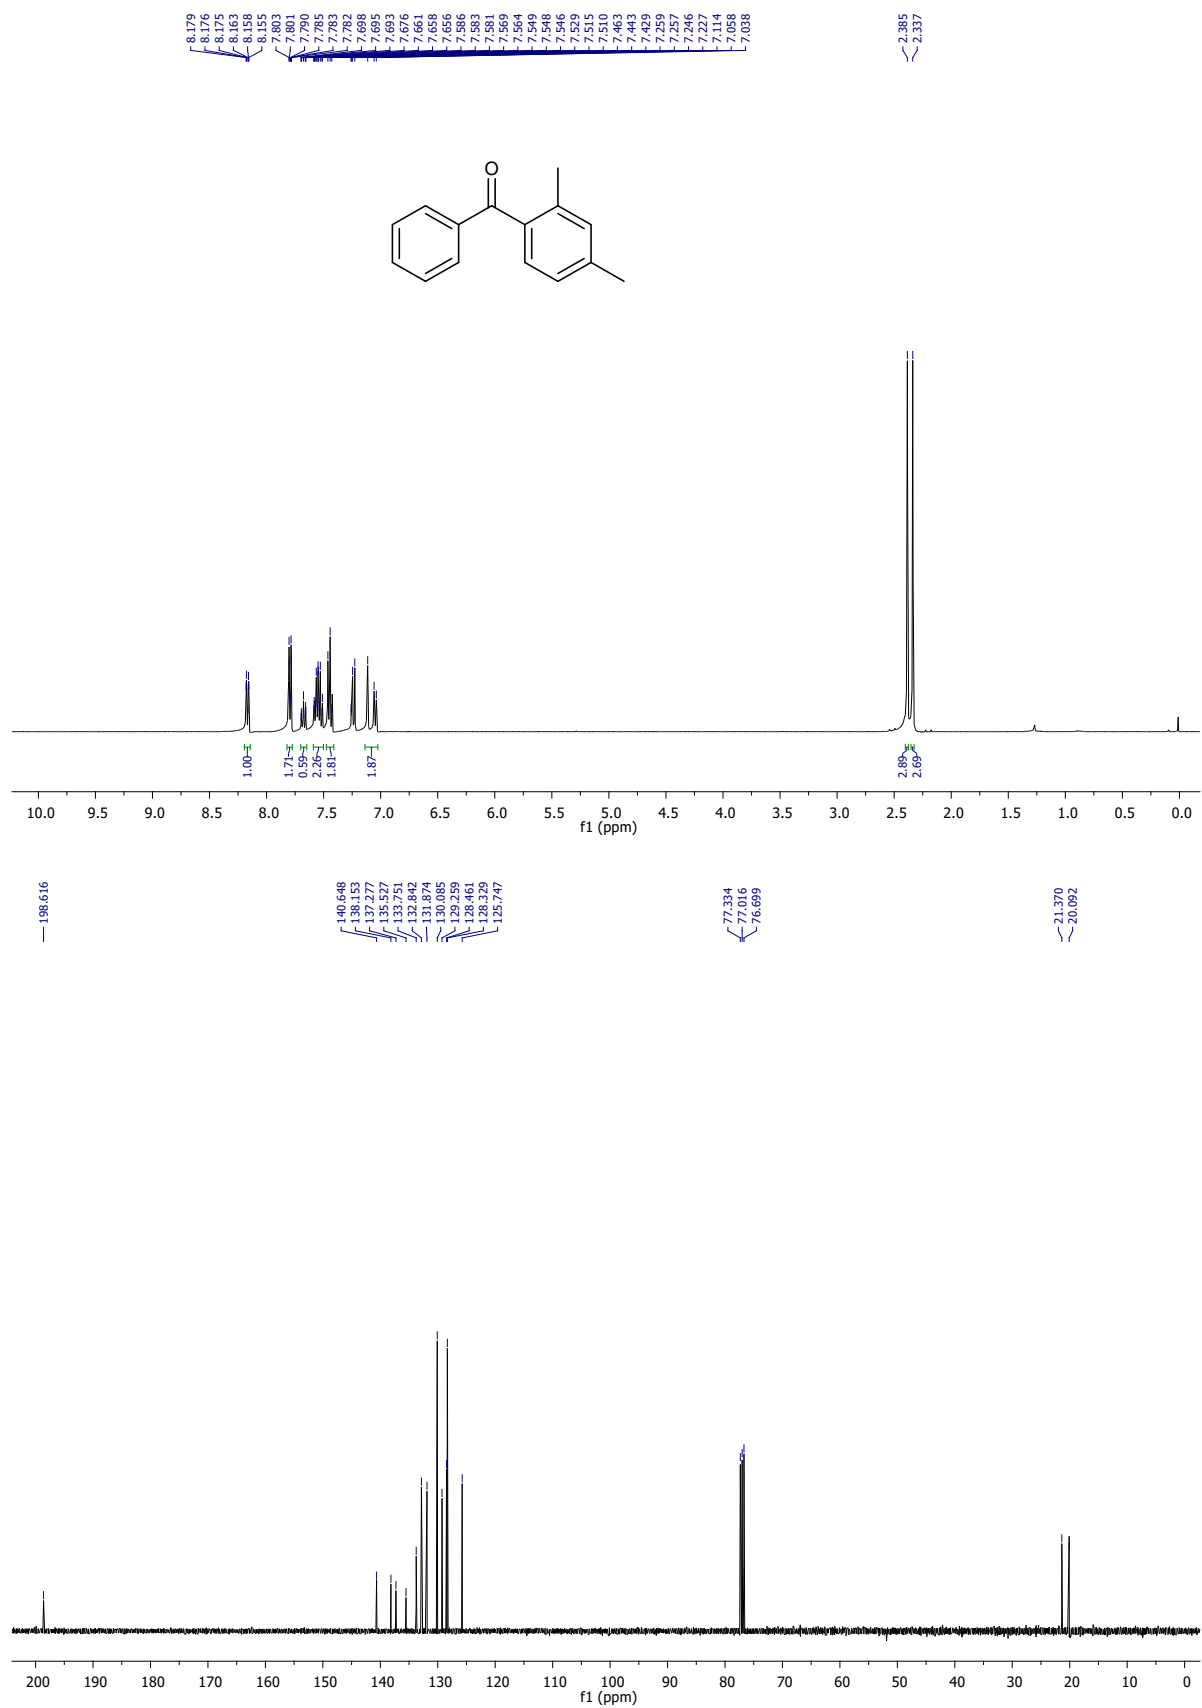

Figure S19. <sup>1</sup>H and <sup>13</sup>C NMR spectra of 2,4-dimethylbenzophenone (CDCl<sub>3</sub>).

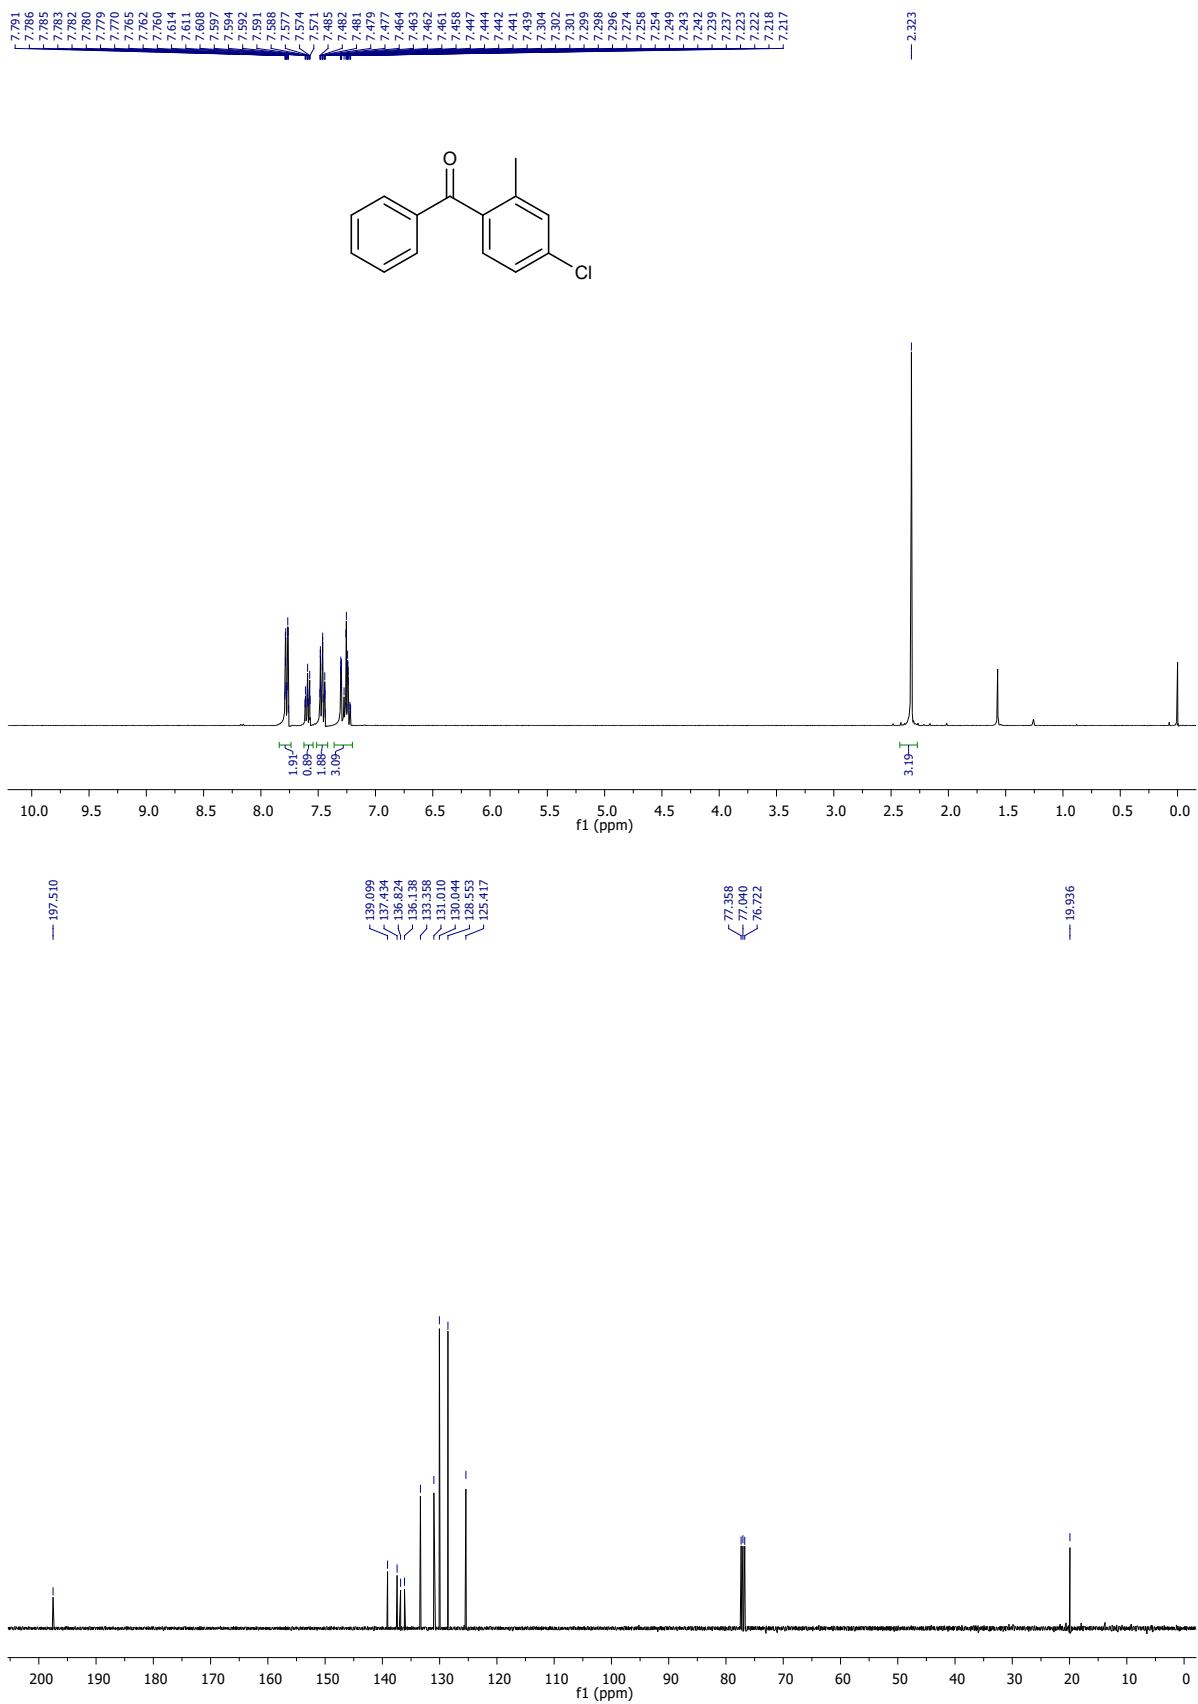

Figure S20. <sup>1</sup>H and <sup>13</sup>C NMR spectra of 4-Chloro-2-methylbenzophenone (CDCl<sub>3</sub>).

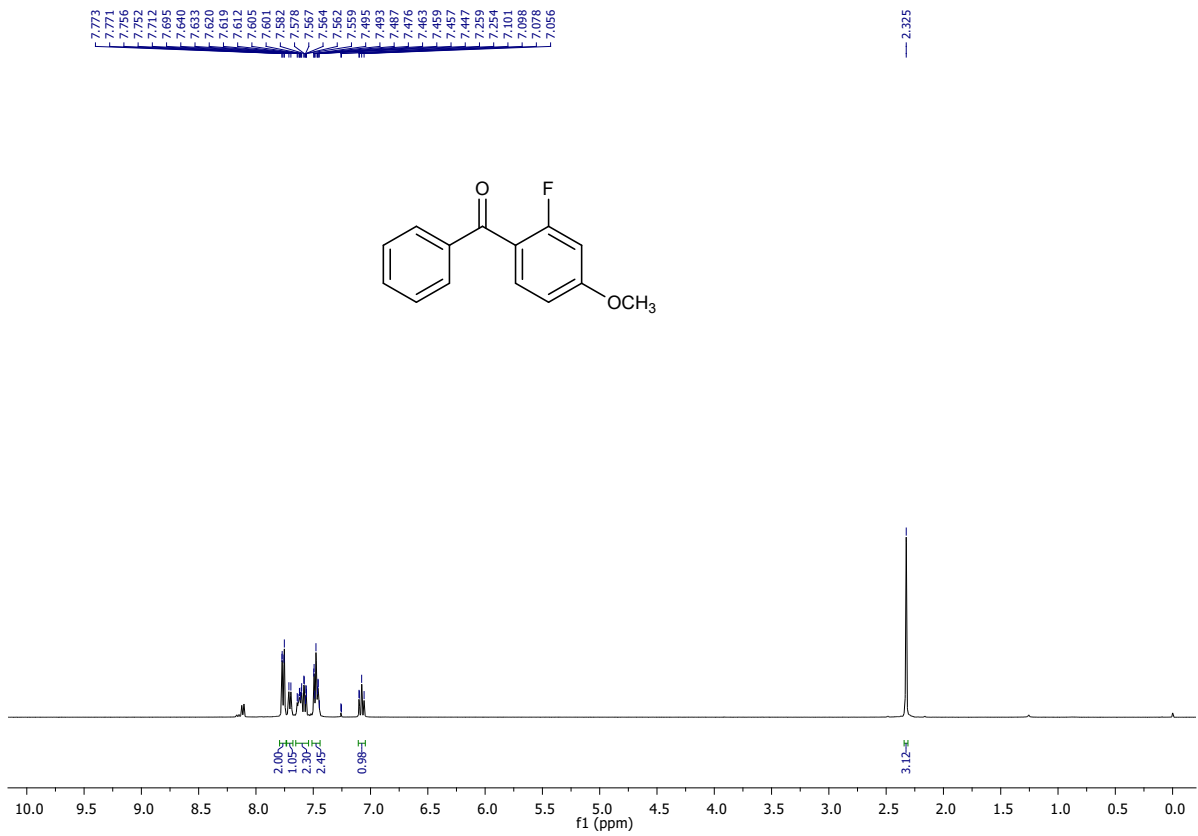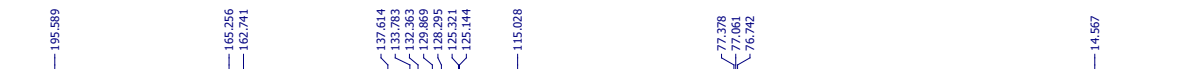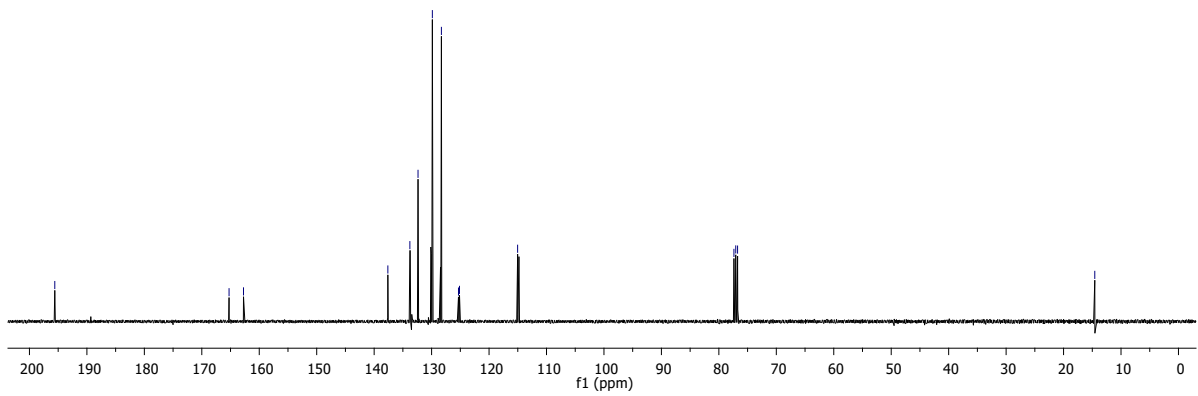

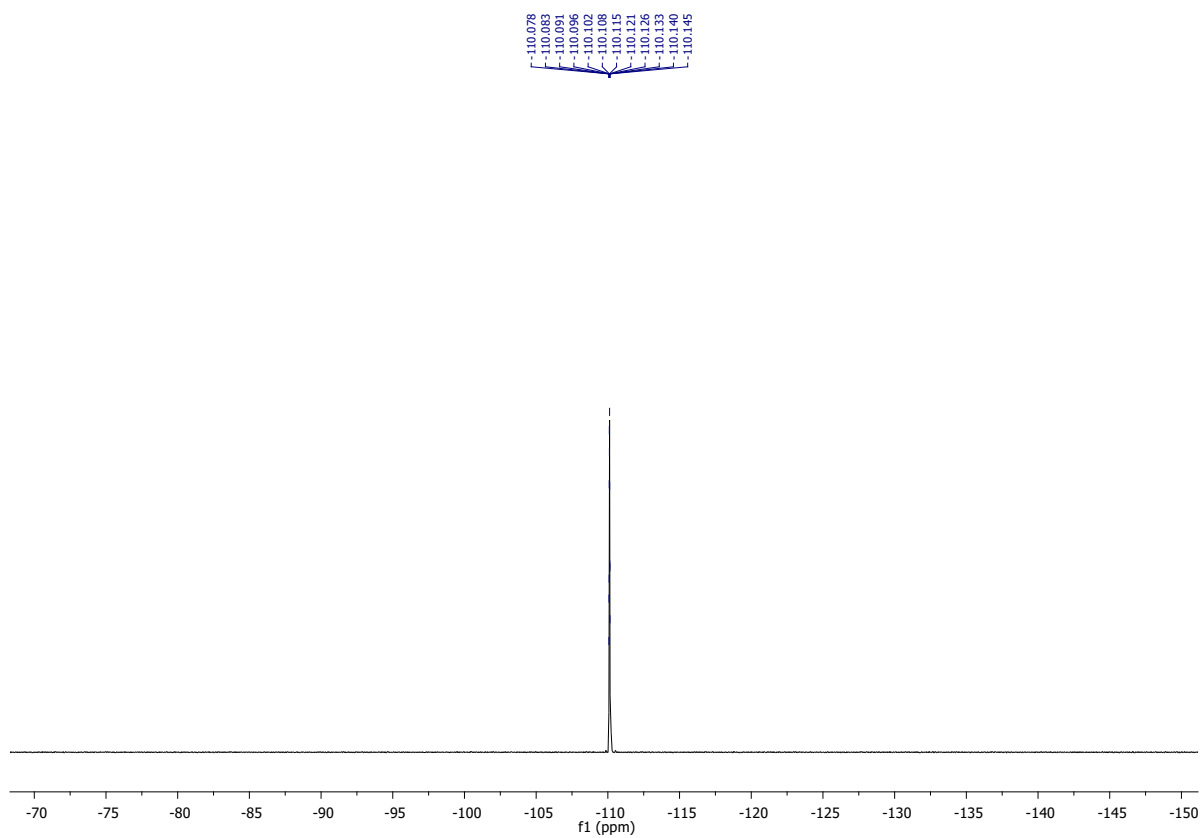

**Figure S21.**  $^1\text{H}$ ,  $^{13}\text{C}$  and  $^{19}\text{F}$  NMR spectrums of 2-Fluoro,4-methoxybenzophenone ( $\text{CDCl}_3$ ).

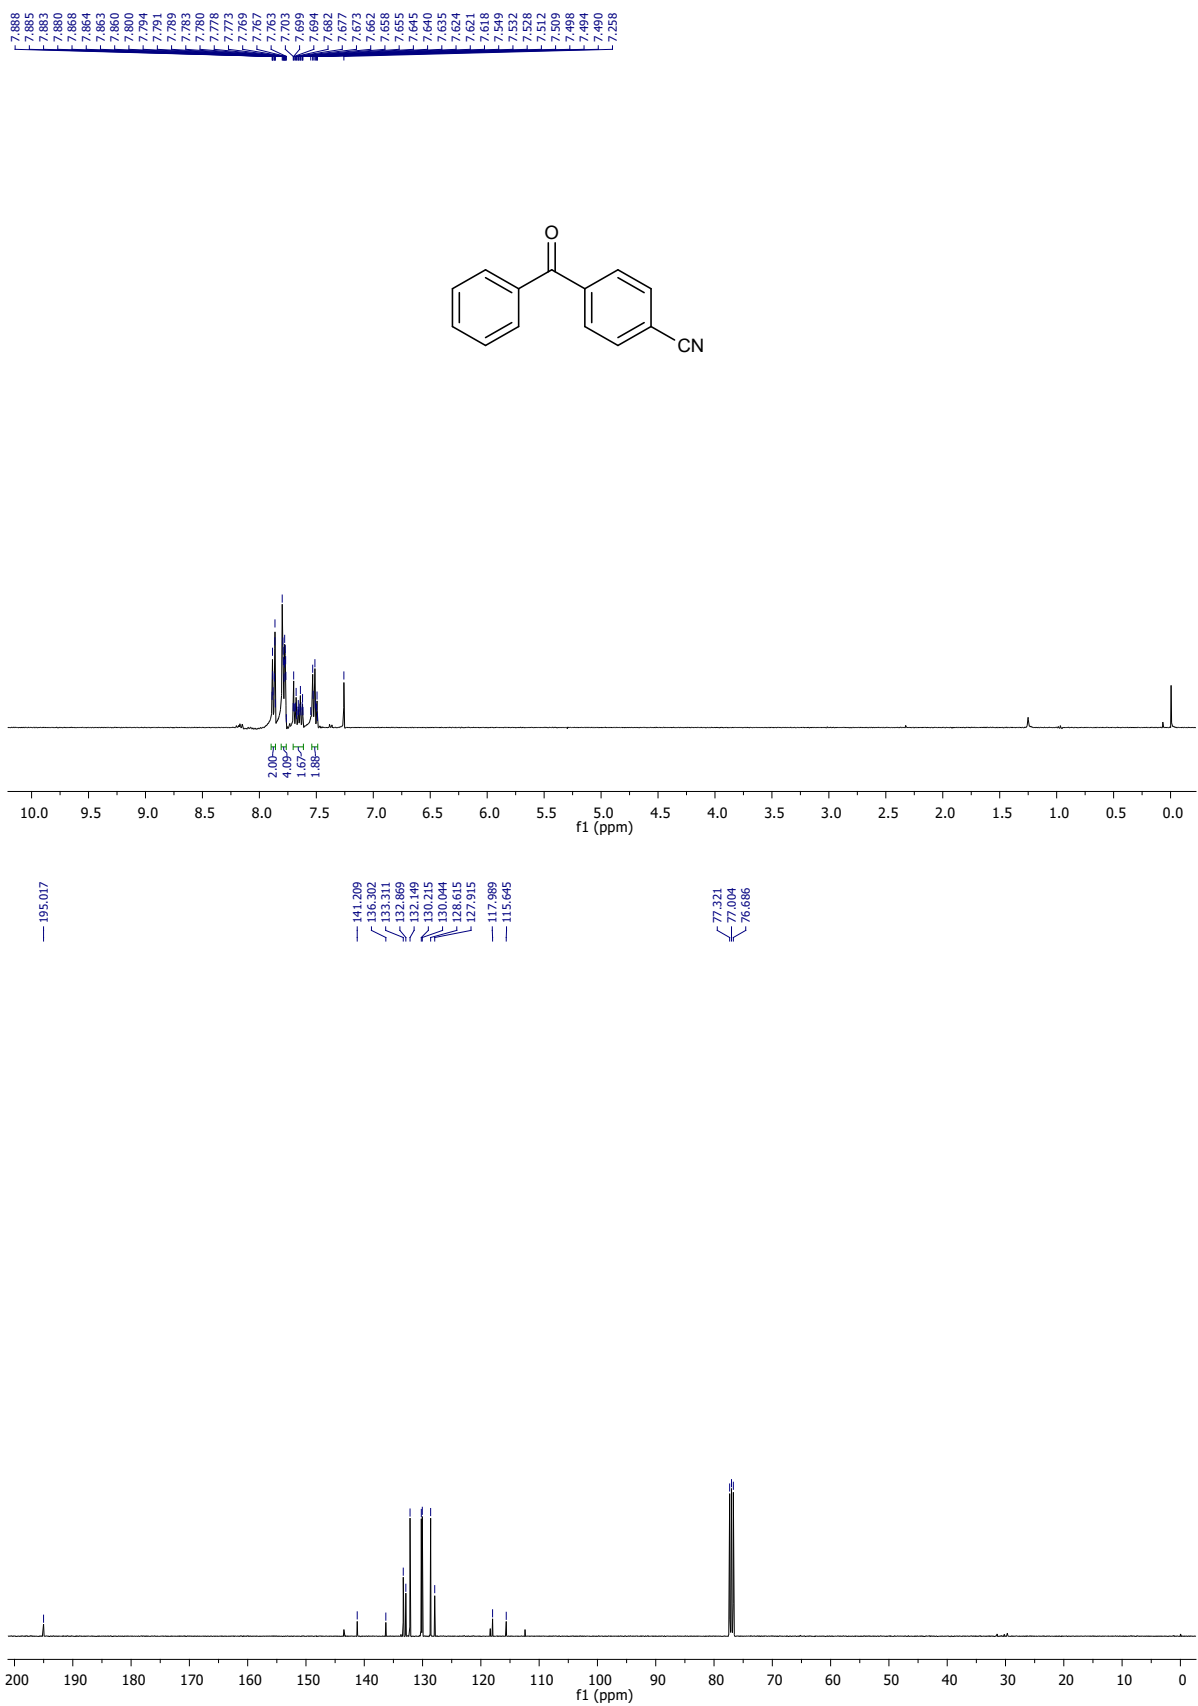

Figure S22. <sup>1</sup>H and <sup>13</sup>C NMR spectra of 4-Cyanobenzophenone (CDCl<sub>3</sub>).



7.906  
7.905  
7.903  
7.895  
7.883  
7.818  
7.817  
7.815  
7.813  
7.811  
7.803  
7.797  
7.794  
7.766  
7.766  
7.747  
7.746  
7.744  
7.719  
7.719  
7.683  
7.653  
7.649  
7.648  
7.646  
7.636  
7.632  
7.631  
7.626  
7.615  
7.614  
7.612  
7.609  
7.550  
7.529  
7.528  
7.527  
7.525  
7.511  
7.495  
7.495  
7.493  
7.490  
7.489  
7.259  
7.258

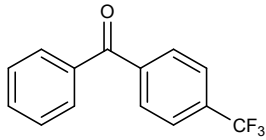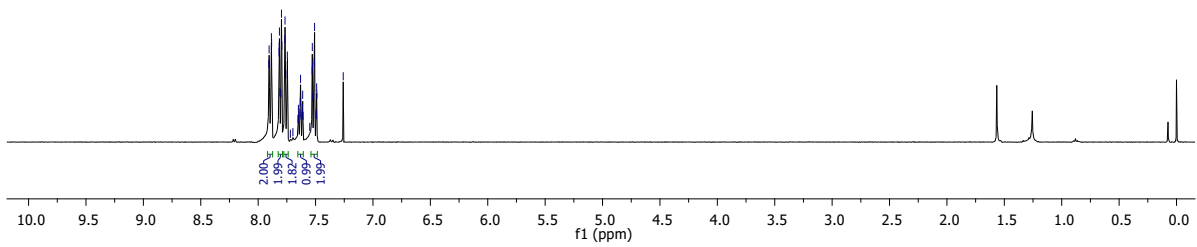

195.517

140.694  
140.682  
136.686  
133.078  
130.124  
130.087  
128.378  
125.304

77.339  
77.021  
76.703

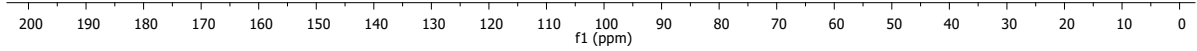

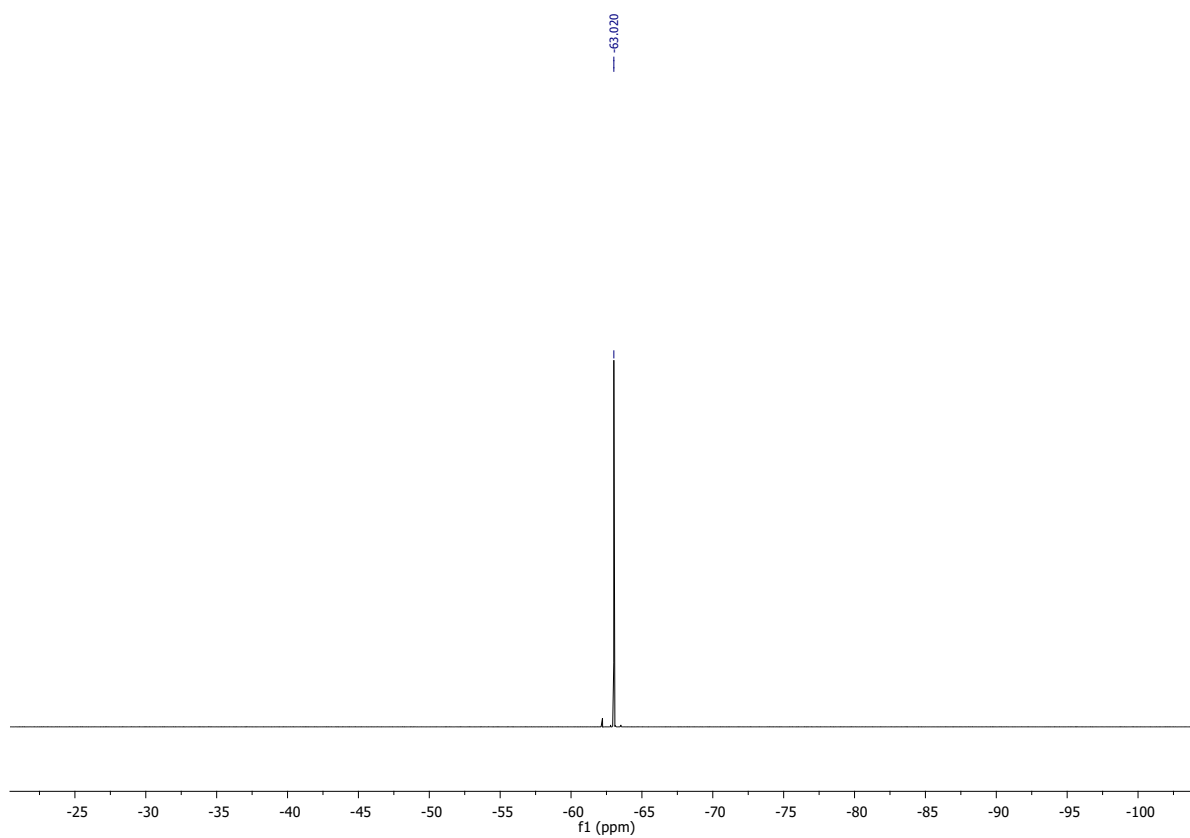

**Figure S23.**  $^1\text{H}$ ,  $^{13}\text{C}$  and  $^{19}\text{F}$  NMR spectrums of 4-(Trifluoromethyl)benzophenone ( $\text{CDCl}_3$ ).

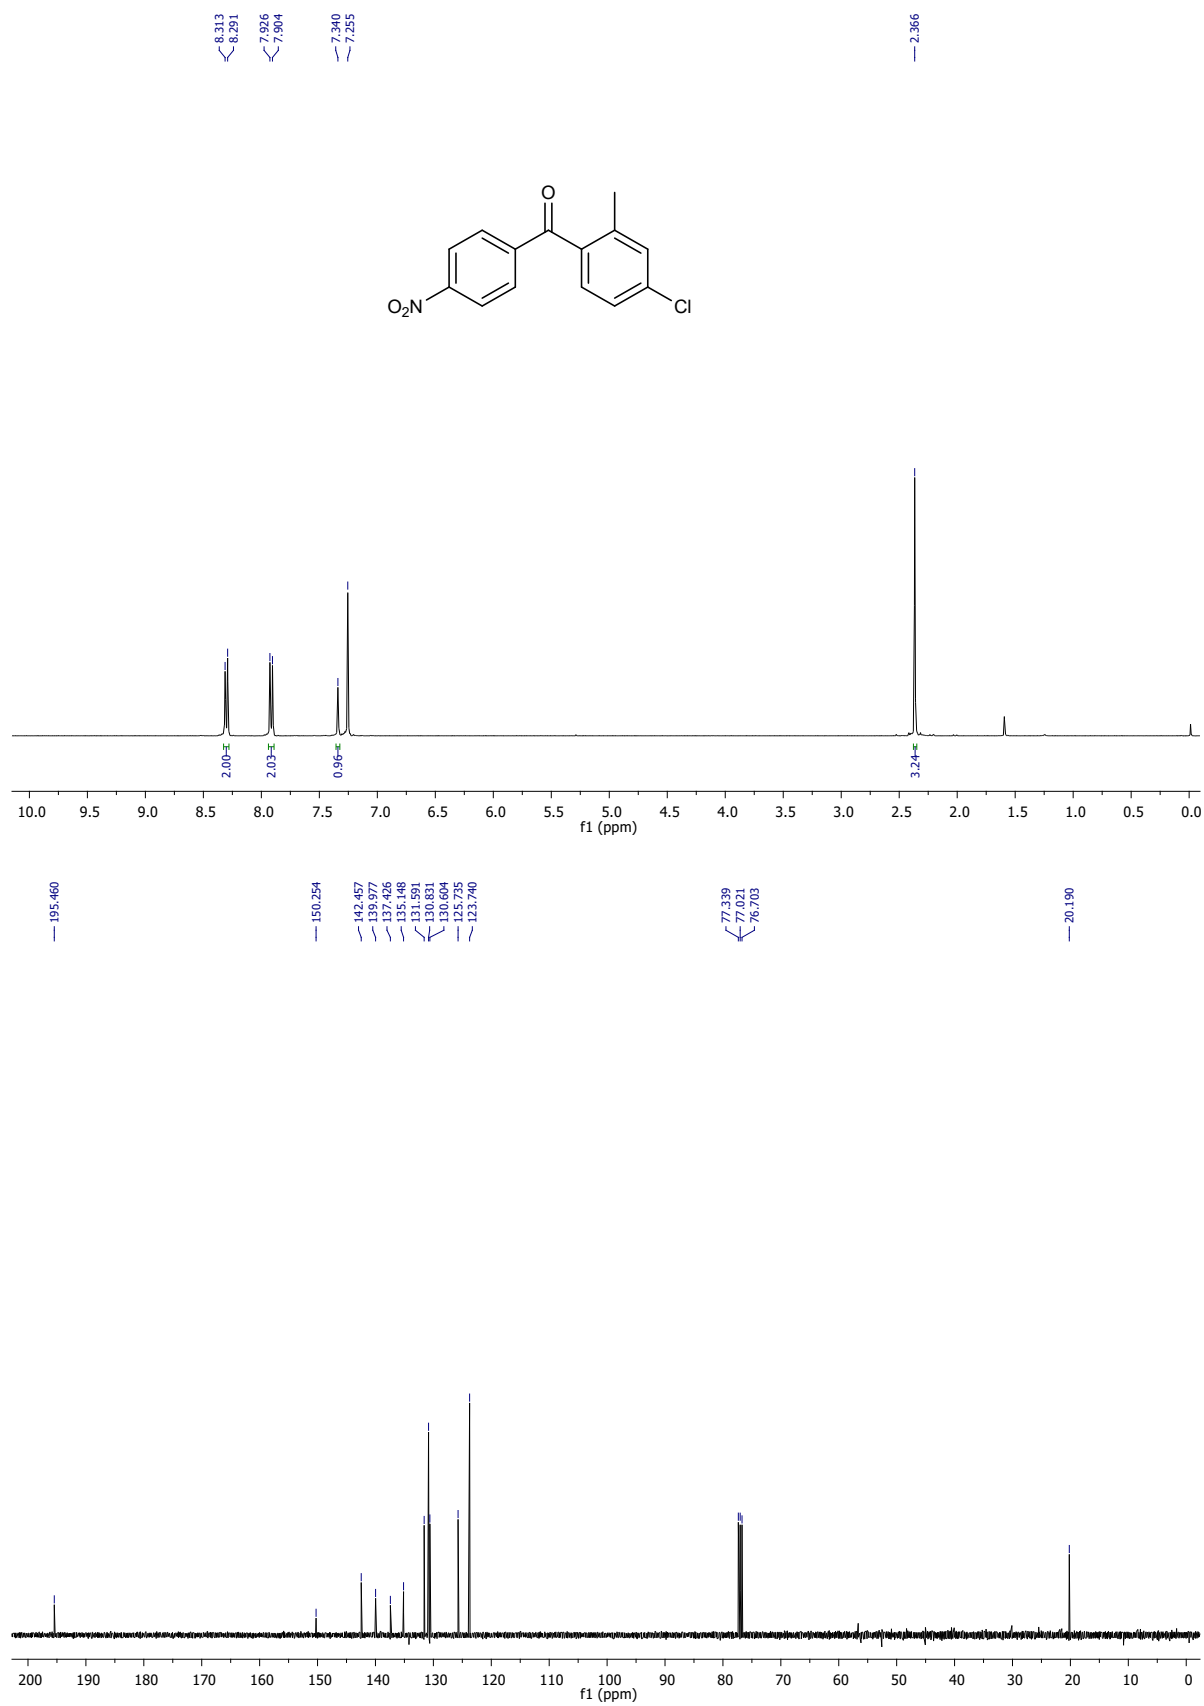

**Figure S24.** <sup>1</sup>H and <sup>13</sup>C NMR spectra of 4-Chloro-2-methyl-4'-nitrobenzophenone (CDCl<sub>3</sub>).

8.362  
8.340  
7.936  
7.913  
7.878  
7.856  
7.383  
7.342  
7.255

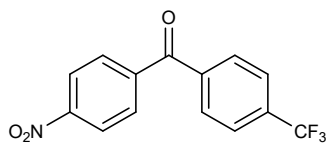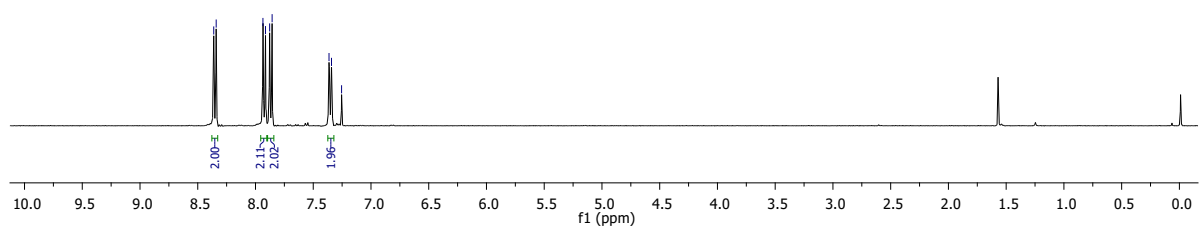

193.218  
152.829  
149.937  
142.300  
134.406  
132.677  
130.599  
123.661  
120.467  
77.325  
77.007  
76.689

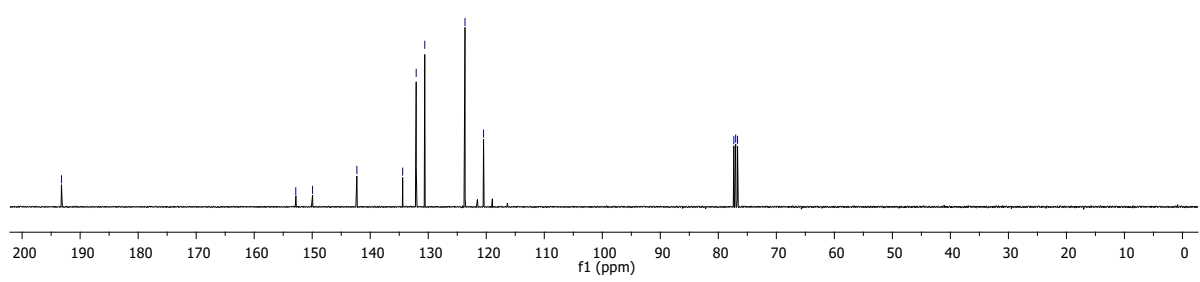

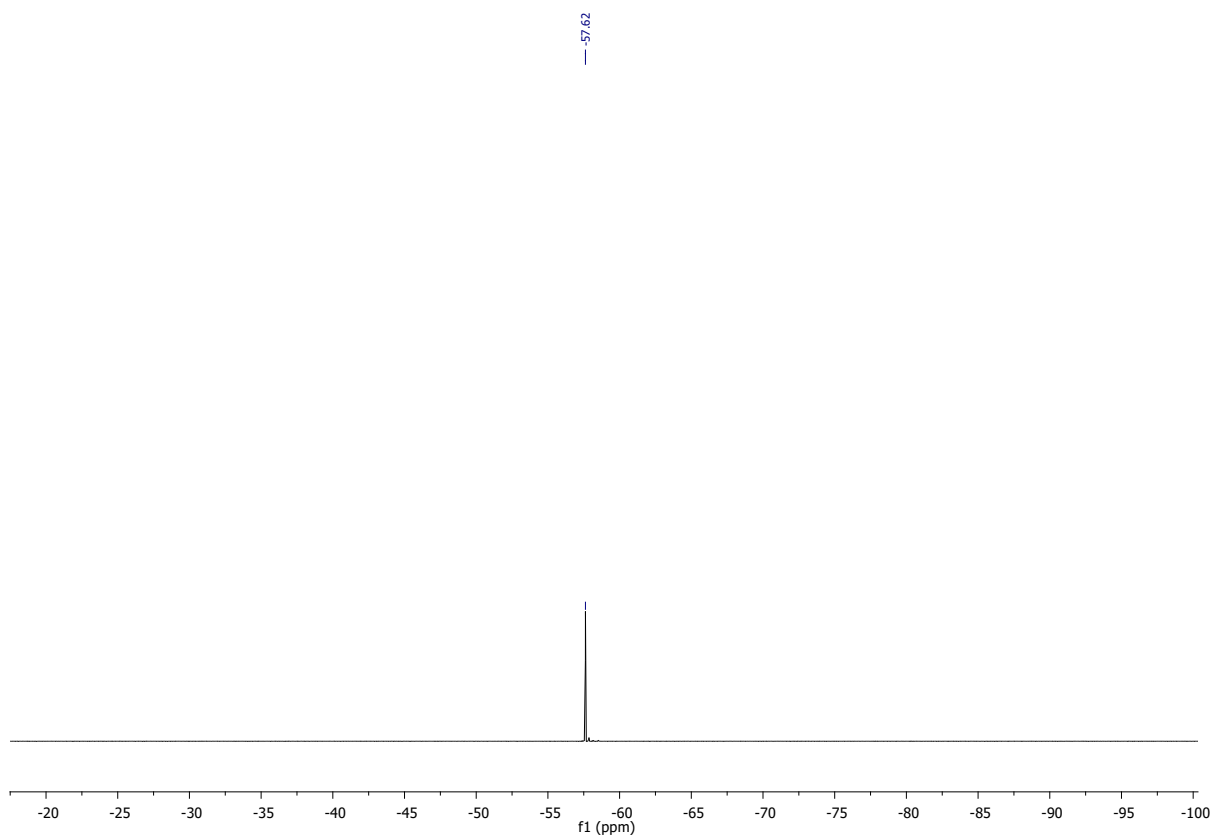

**Figure S25.**  $^1\text{H}$ ,  $^{13}\text{C}$  and  $^{19}\text{F}$  NMR spectra of 4-Trifluoromethyl-4'-nitrobenzophenone ( $\text{CDCl}_3$ ).

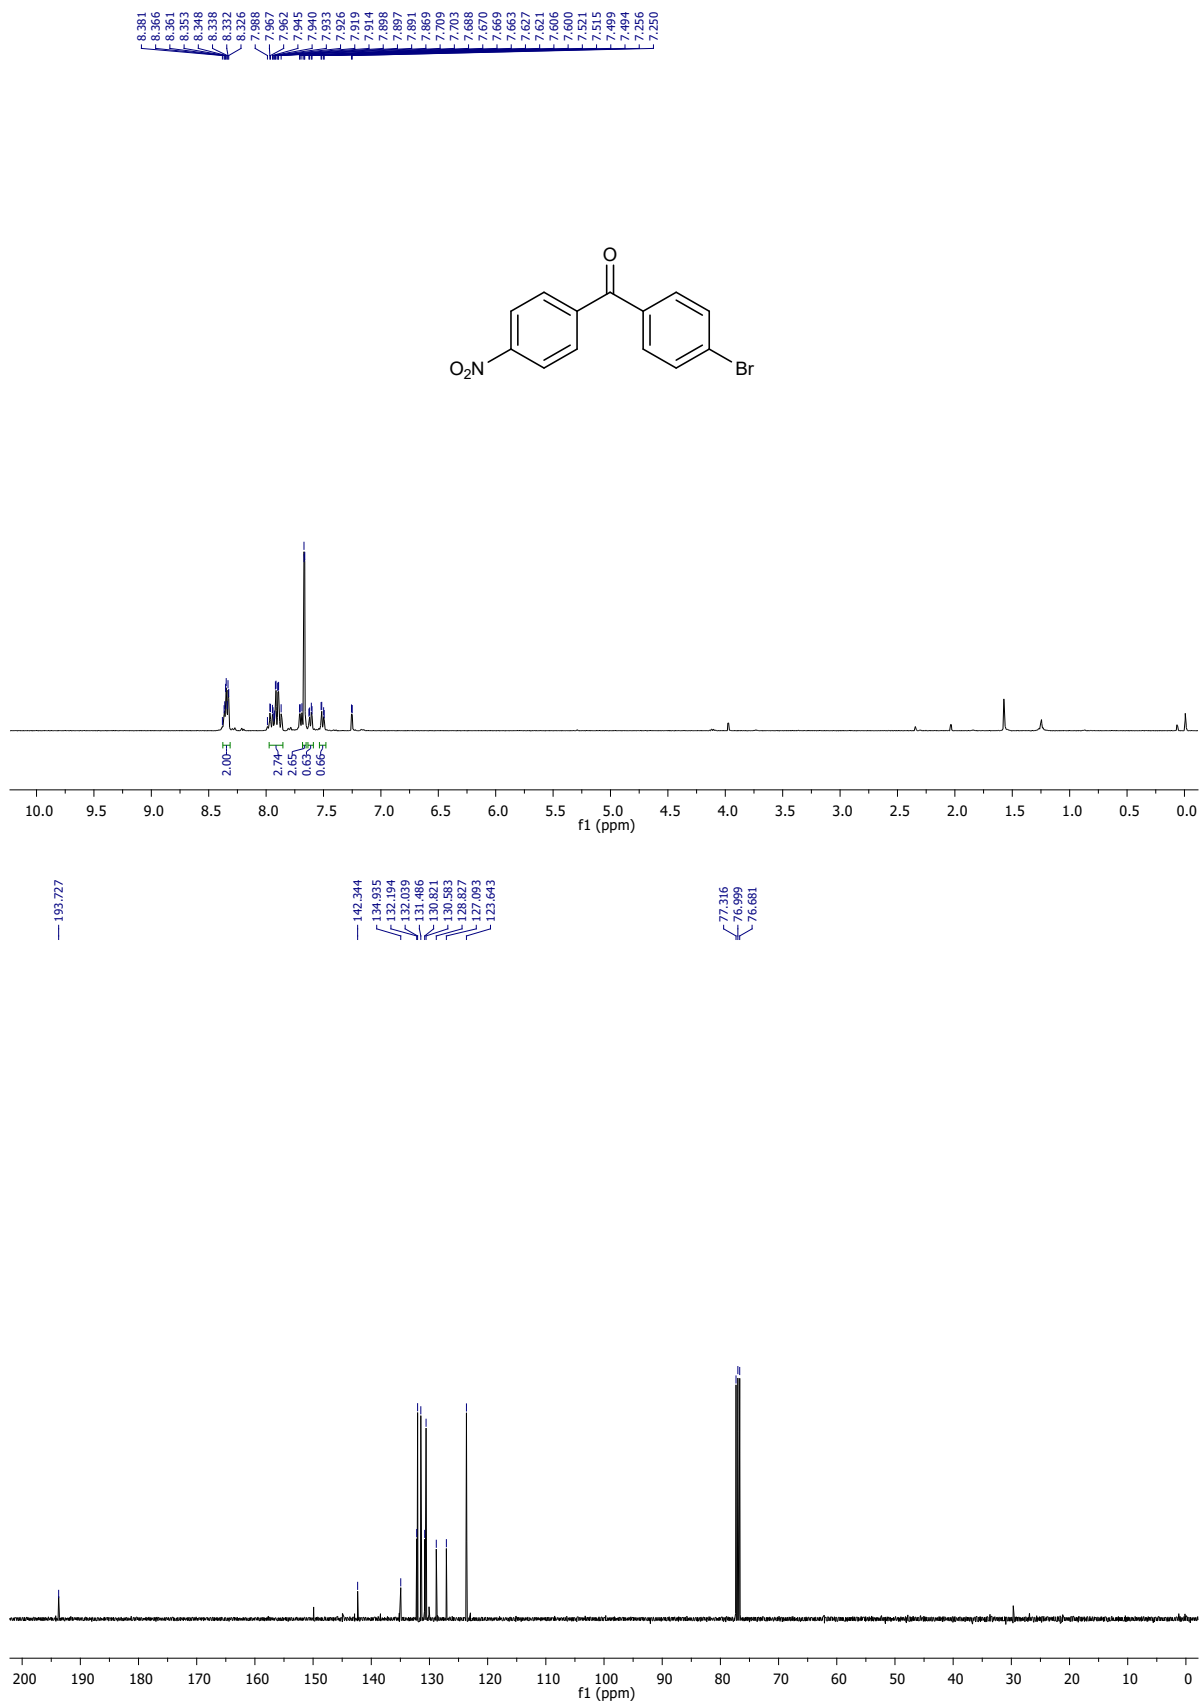

Figure S26. <sup>1</sup>H and <sup>13</sup>C NMR spectra of 4-Bromo-4'-nitrobenzophenone (CDCl<sub>3</sub>).

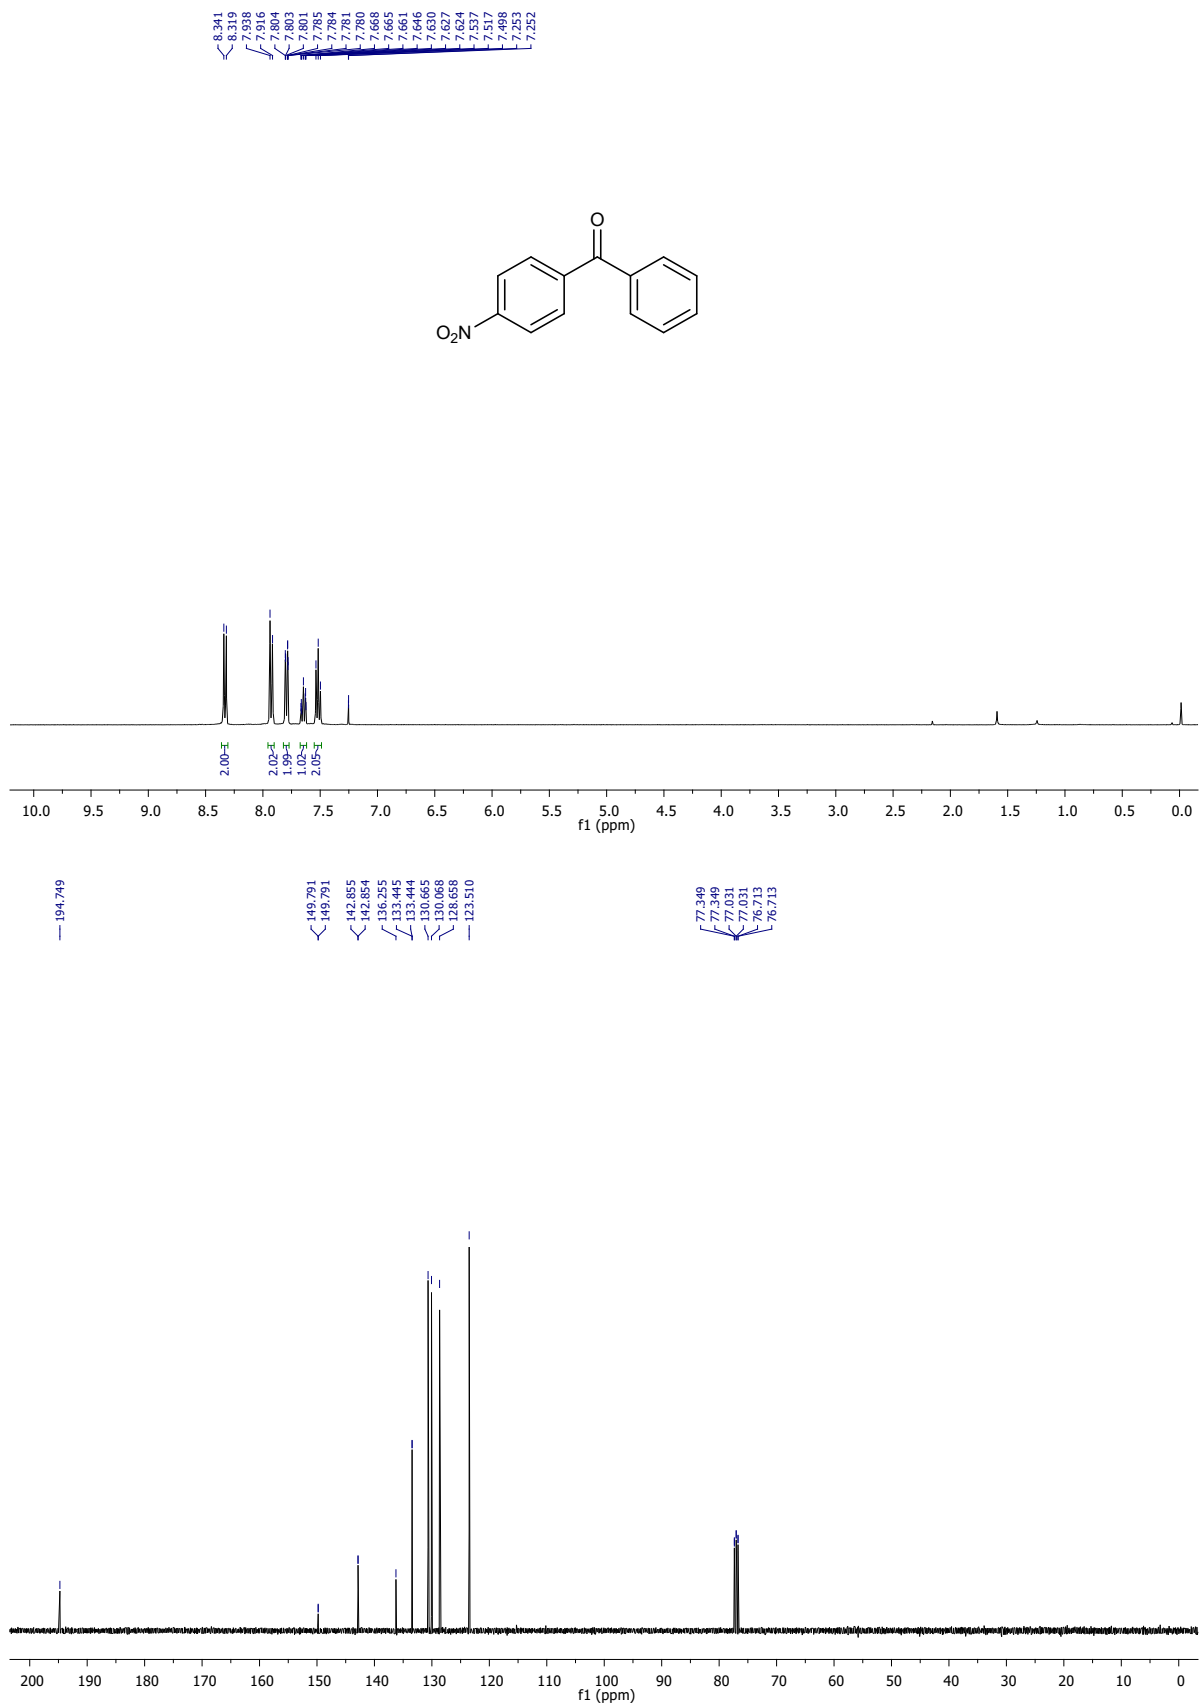

Figure S27. <sup>1</sup>H and <sup>13</sup>C NMR spectra of 4'-nitrobenzophenone (CDCl<sub>3</sub>).

$^1\text{H}$ - and  $^{13}\text{C}$ - NMR spectras of Suzuki products

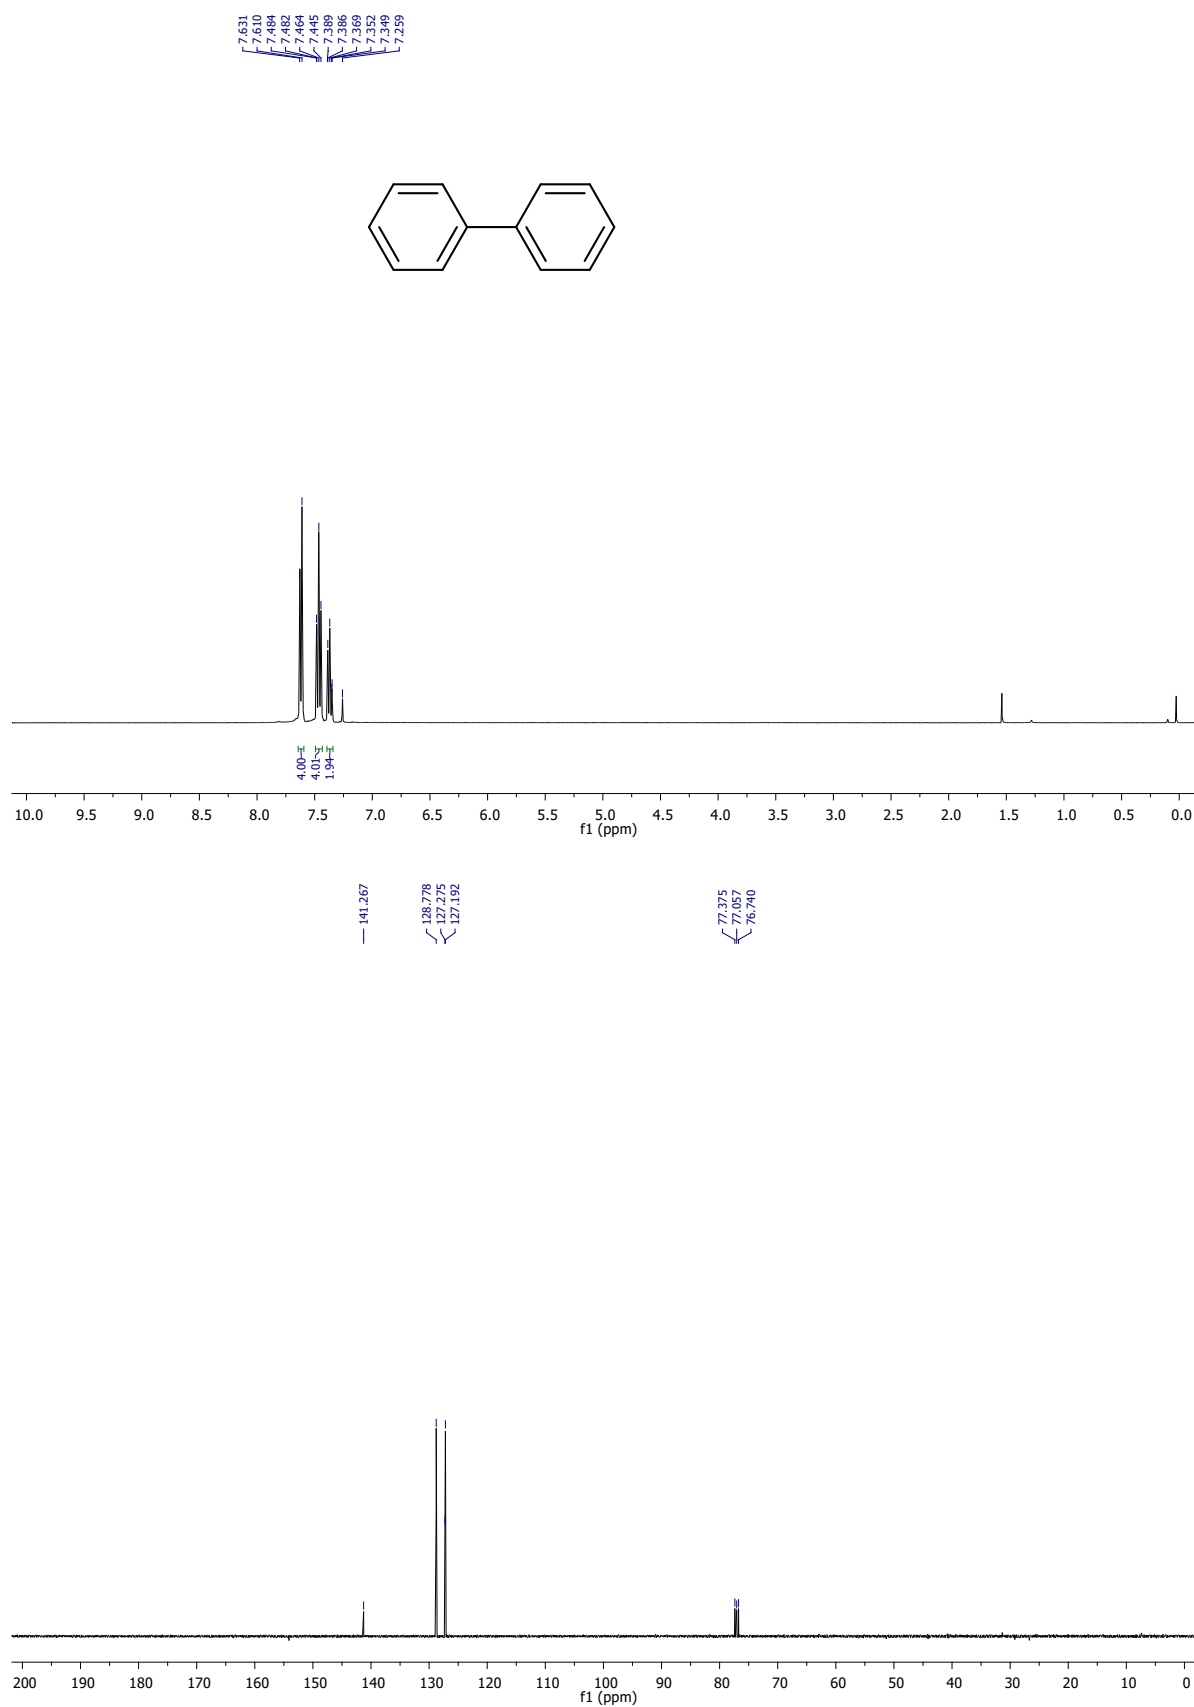

Figure S28.  $^1\text{H}$  and  $^{13}\text{C}$  NMR spectras of Biphenyl ( $\text{CDCl}_3$ ).



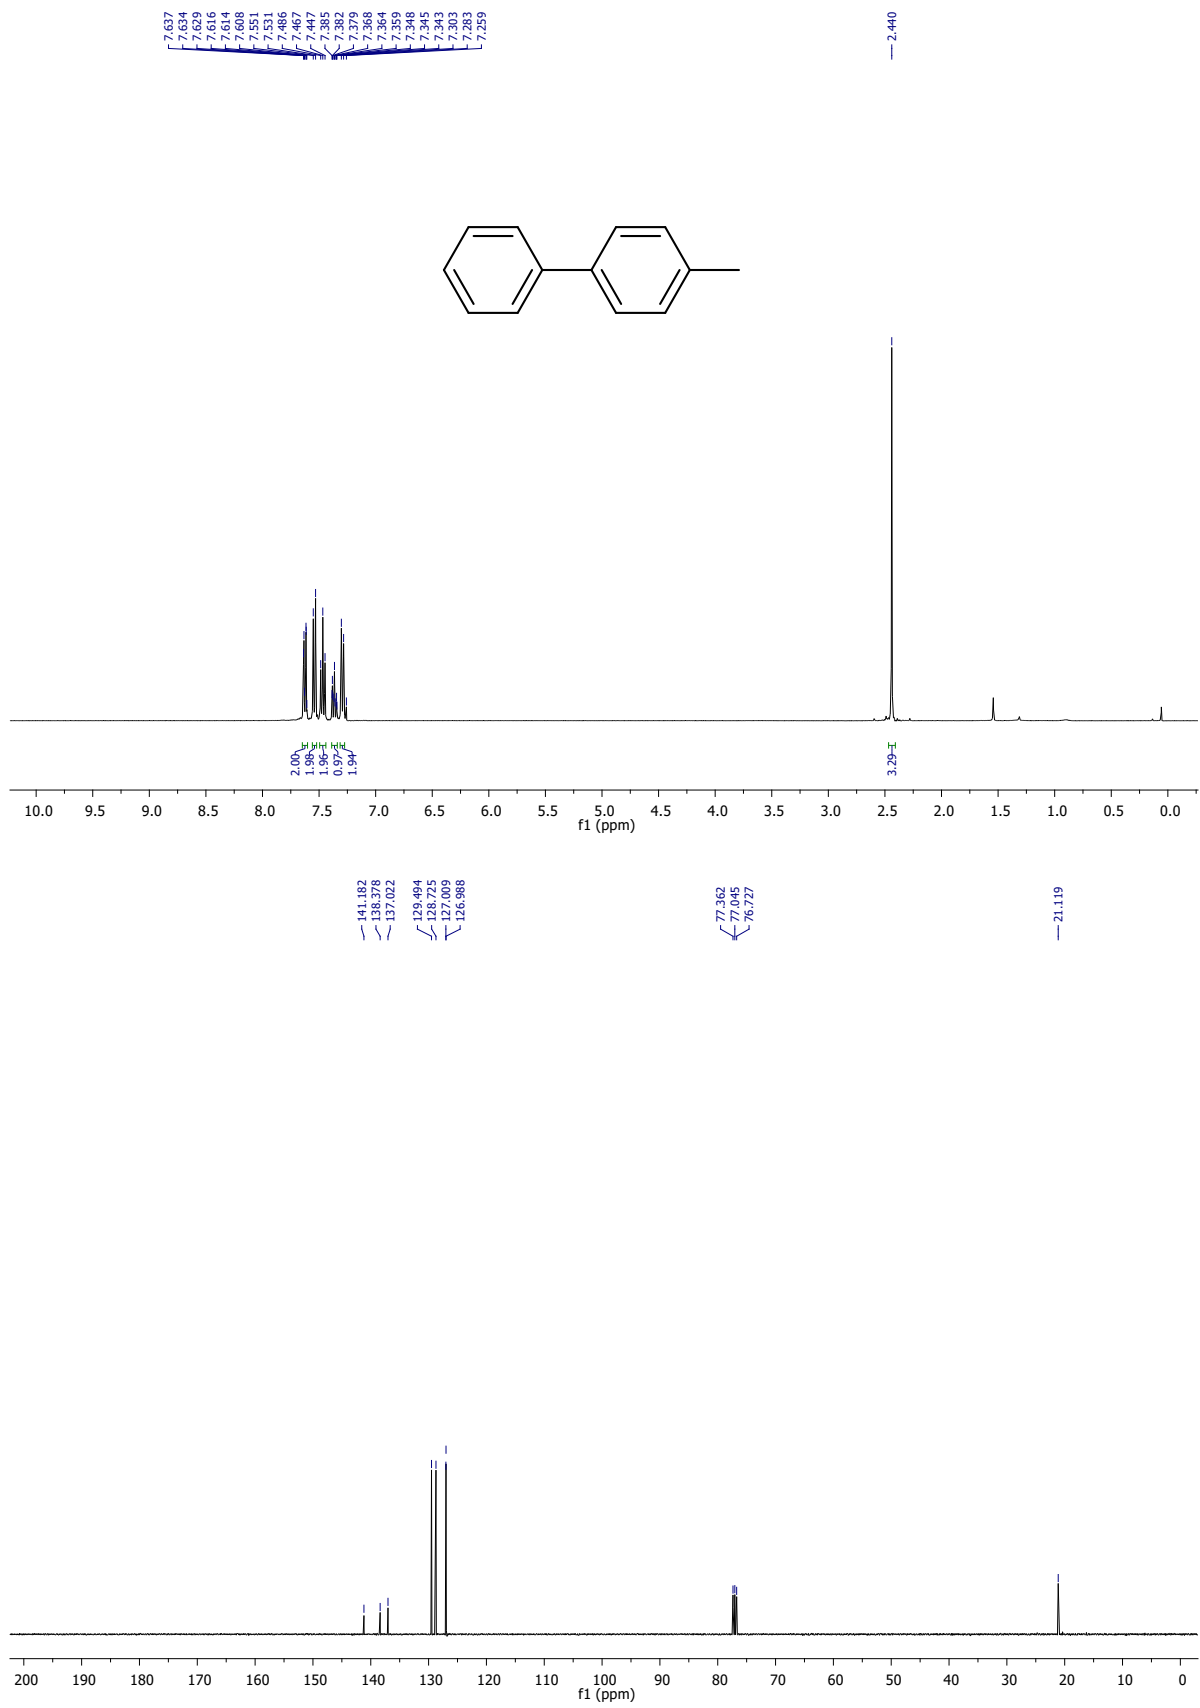

Figure S29. <sup>1</sup>H and <sup>13</sup>C NMR spectra of 4-Methylbiphenyl (CDCl<sub>3</sub>).

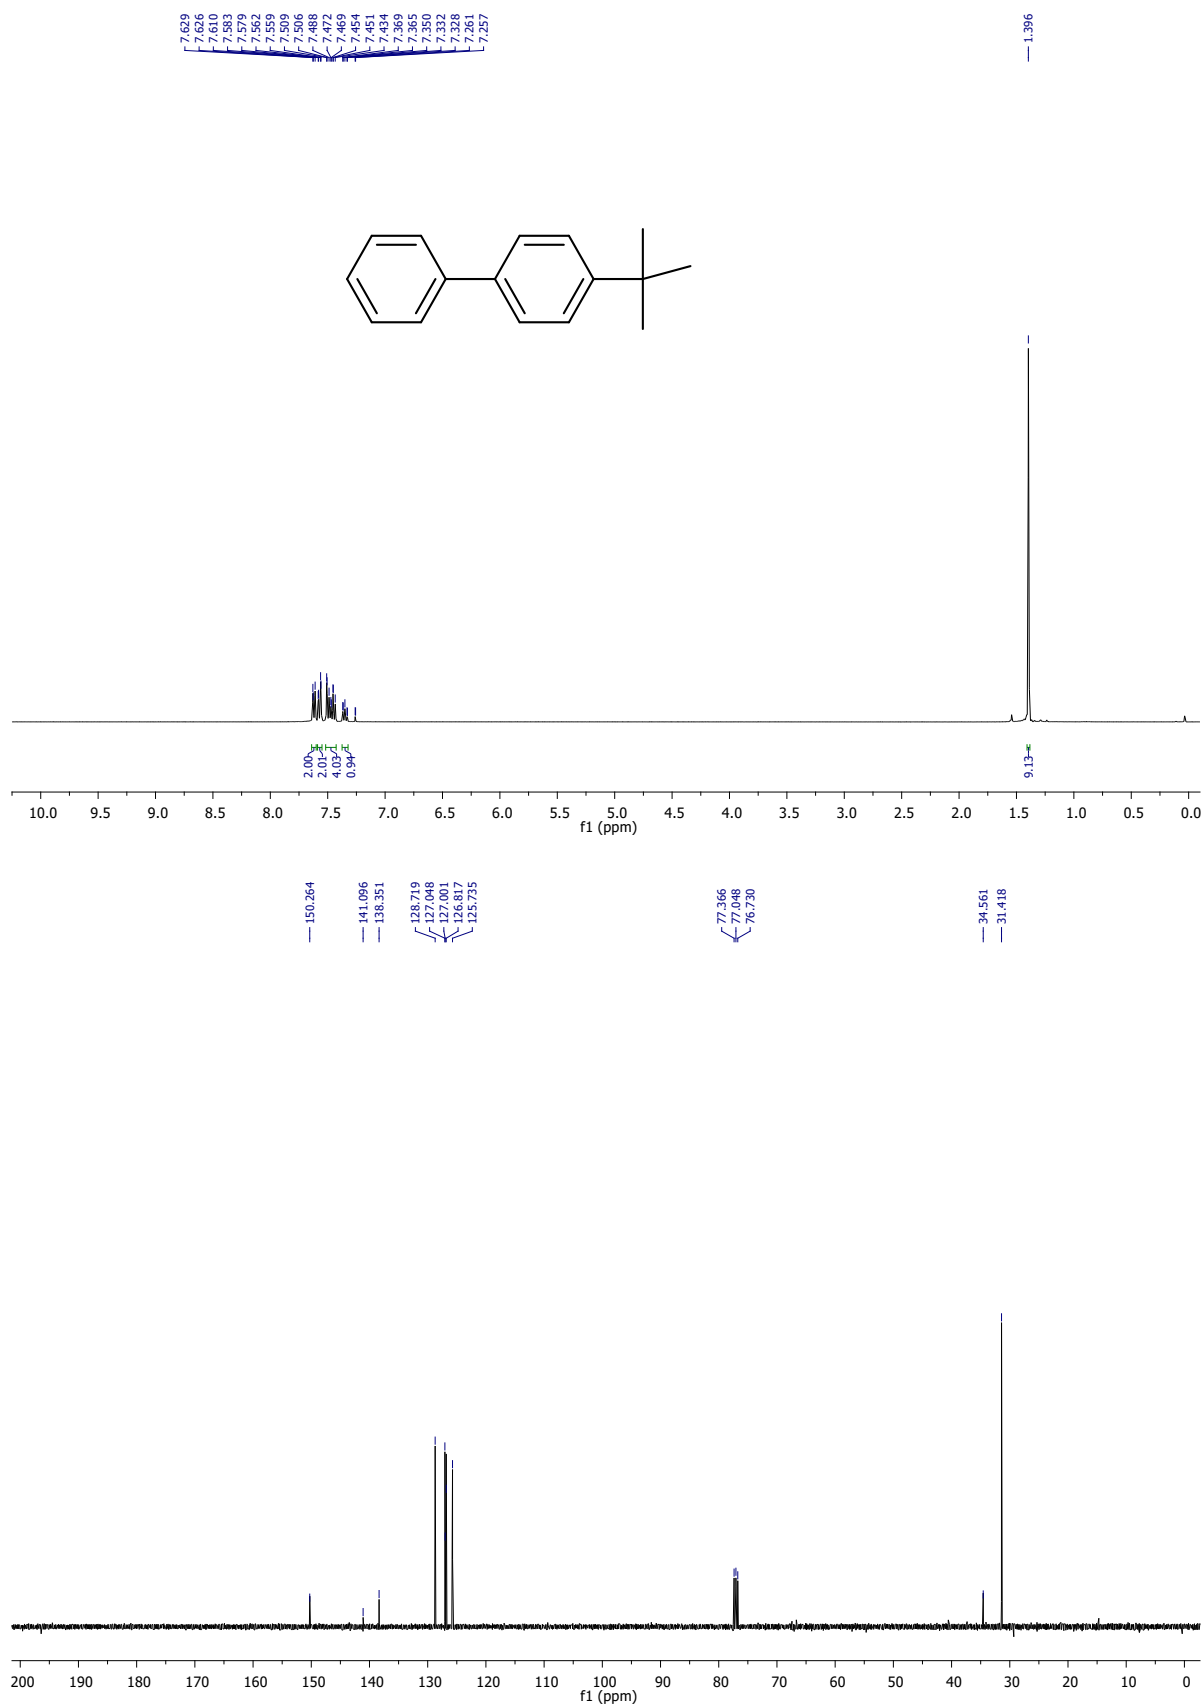

Figure S30. <sup>1</sup>H and <sup>13</sup>C NMR spectra of 4-Tert-butylbiphenyl (CDCl<sub>3</sub>).

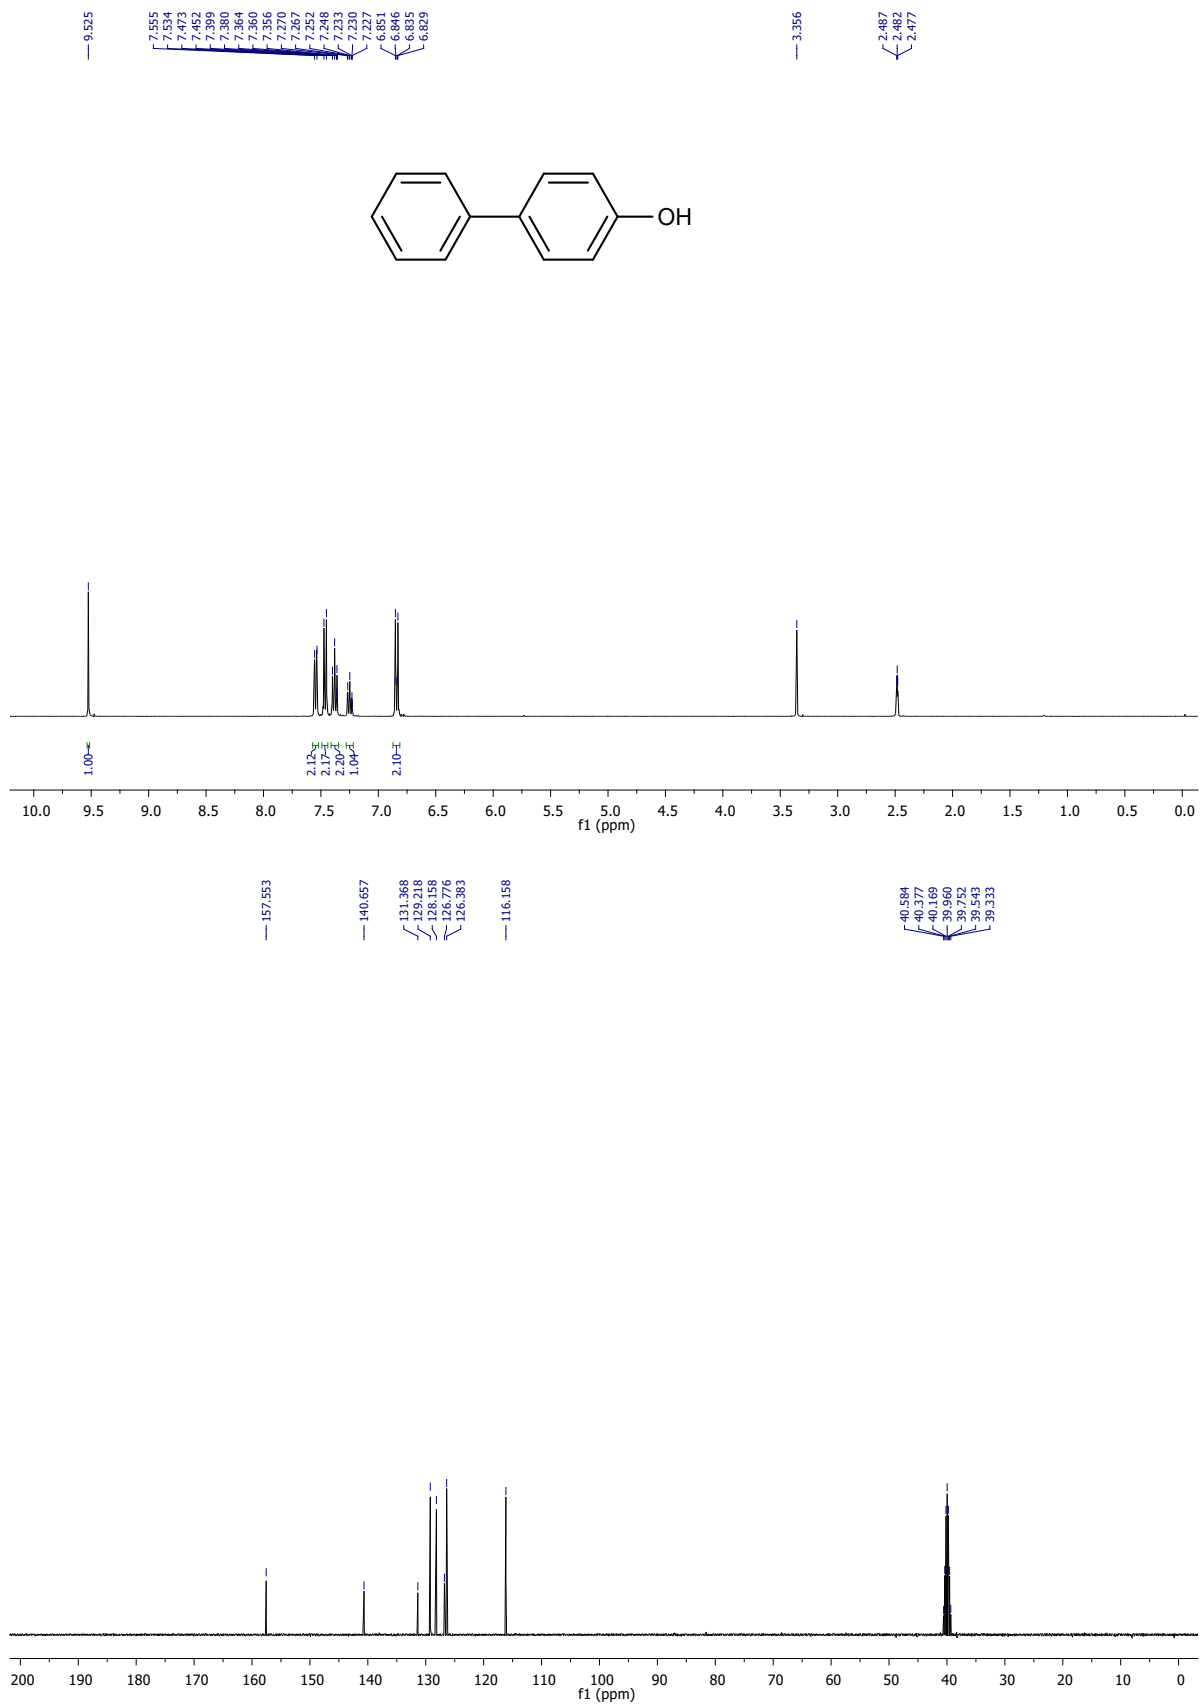

Figure S31. <sup>1</sup>H and <sup>13</sup>C NMR spectra of 4-Hydroxybiphenyl (DMSO-*d*<sub>6</sub>).

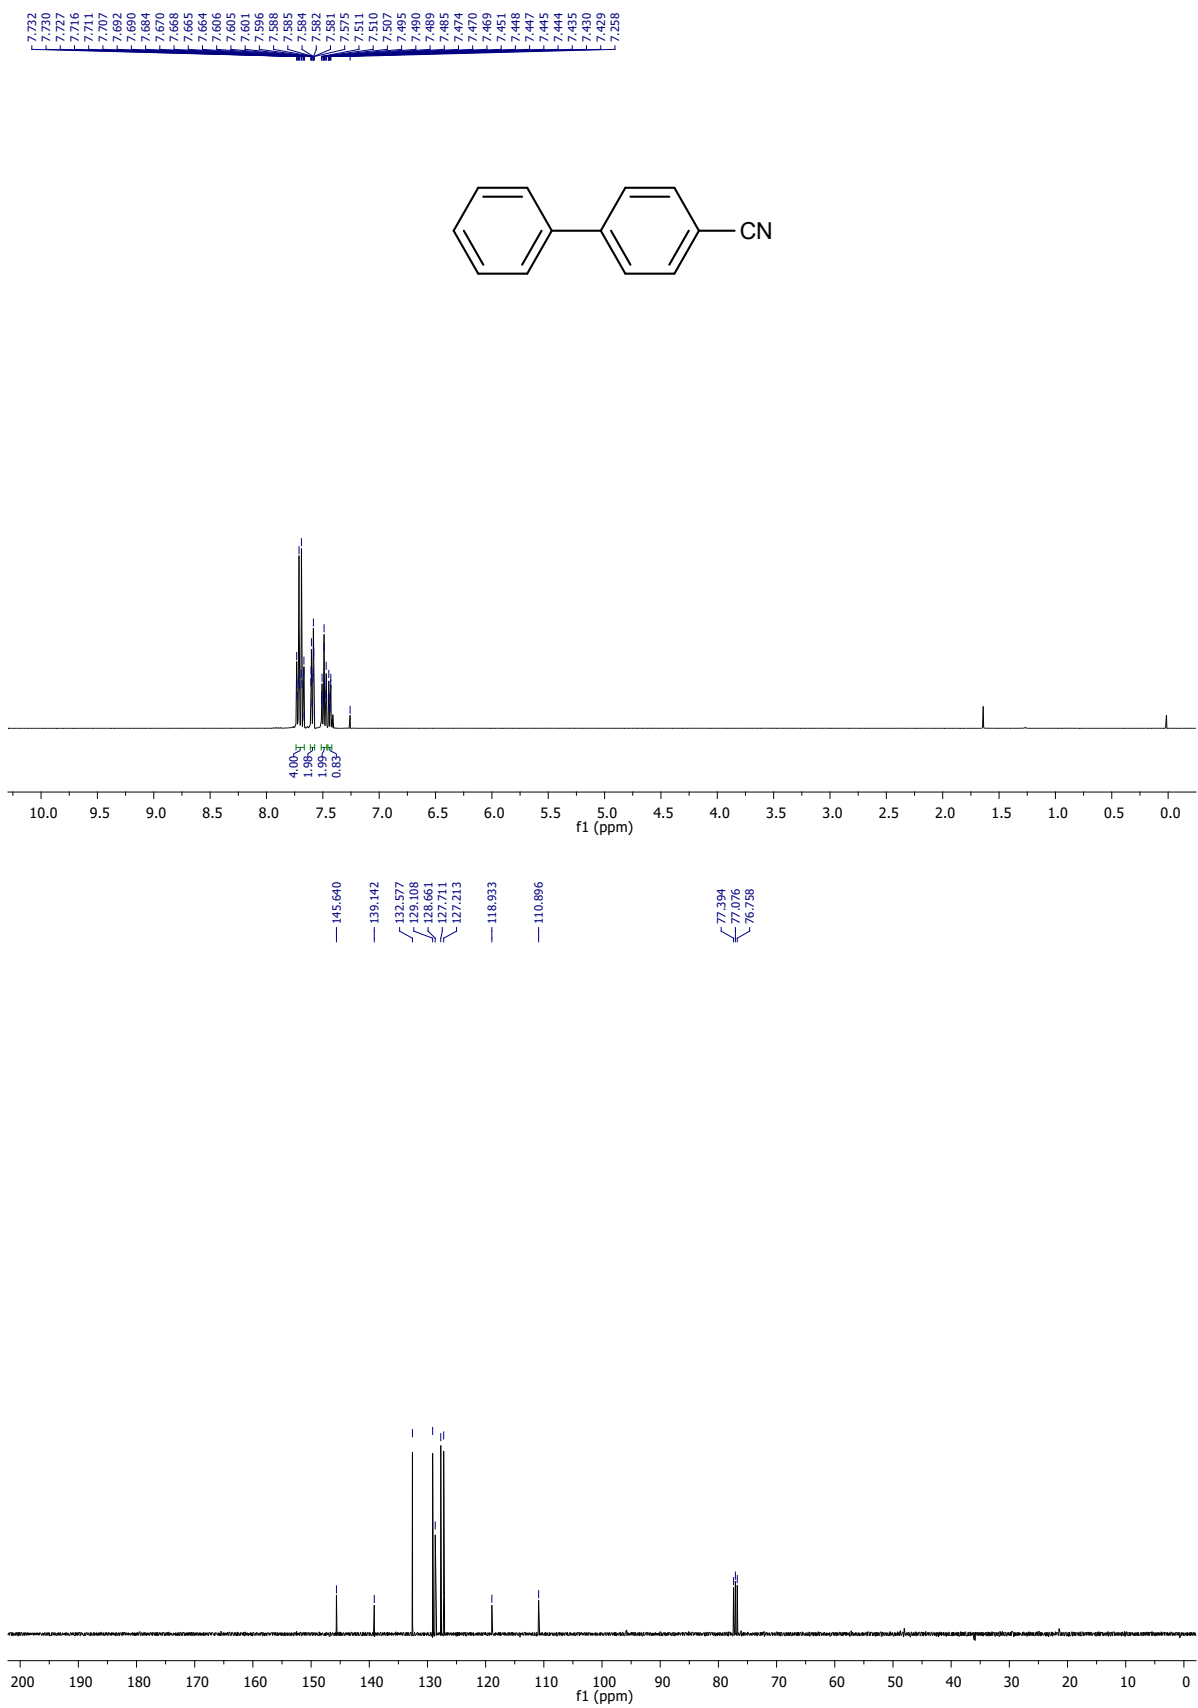

Figure S32. <sup>1</sup>H and <sup>13</sup>C NMR spectra of 4-Cyanobiphenyl (CDCl<sub>3</sub>).

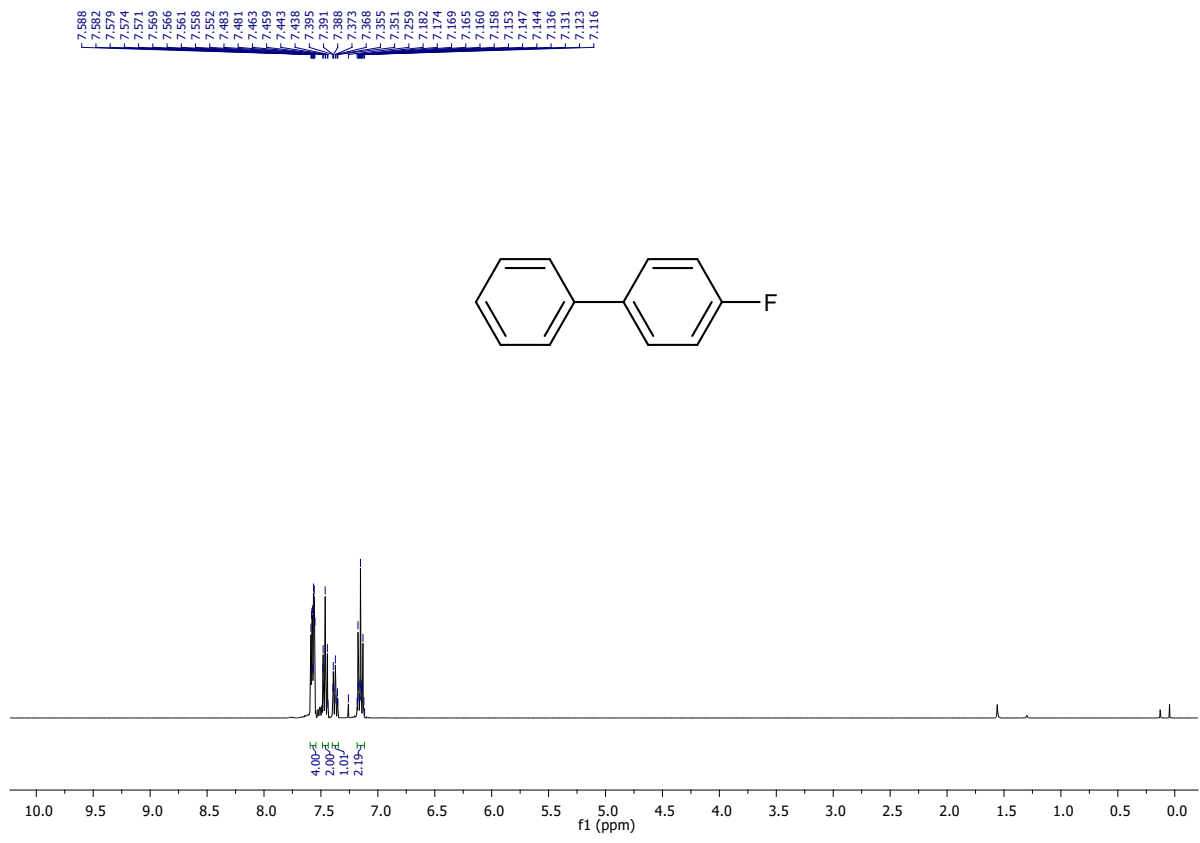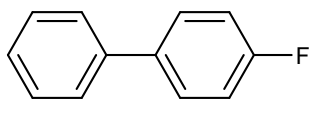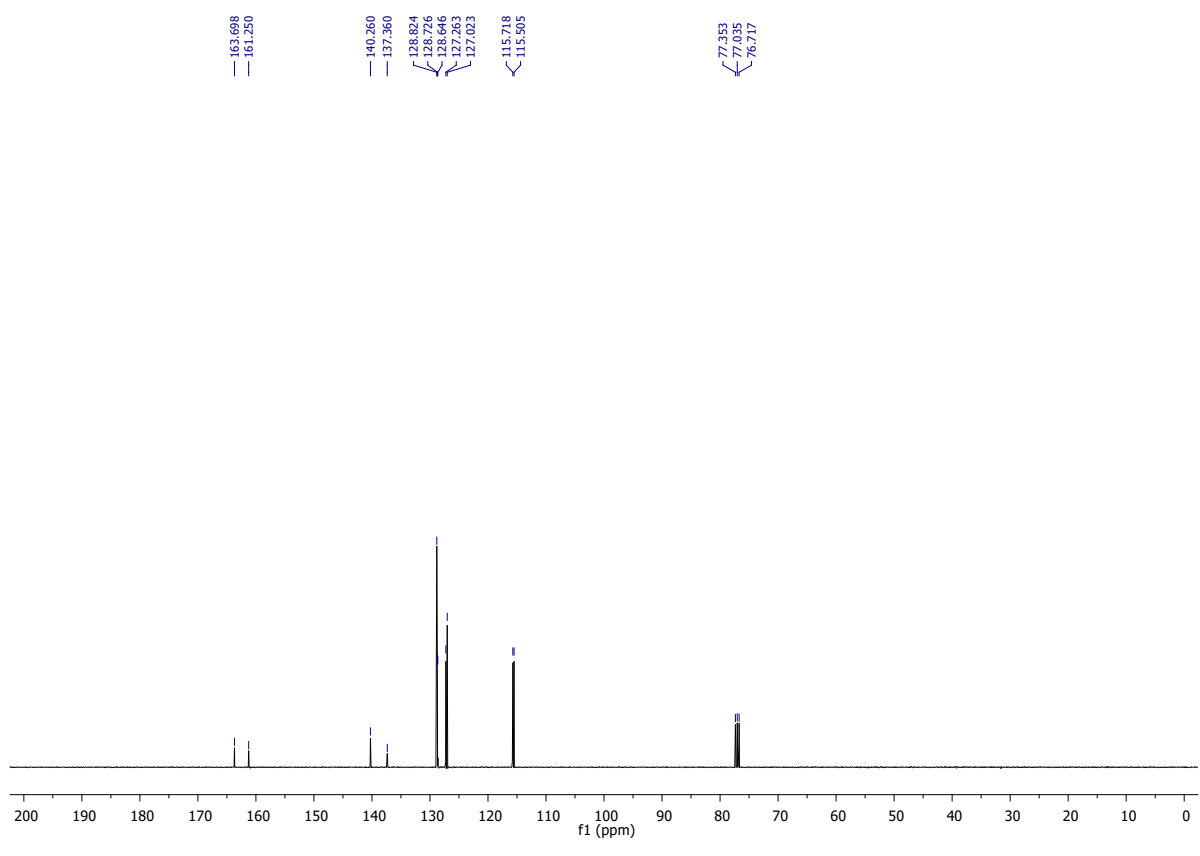

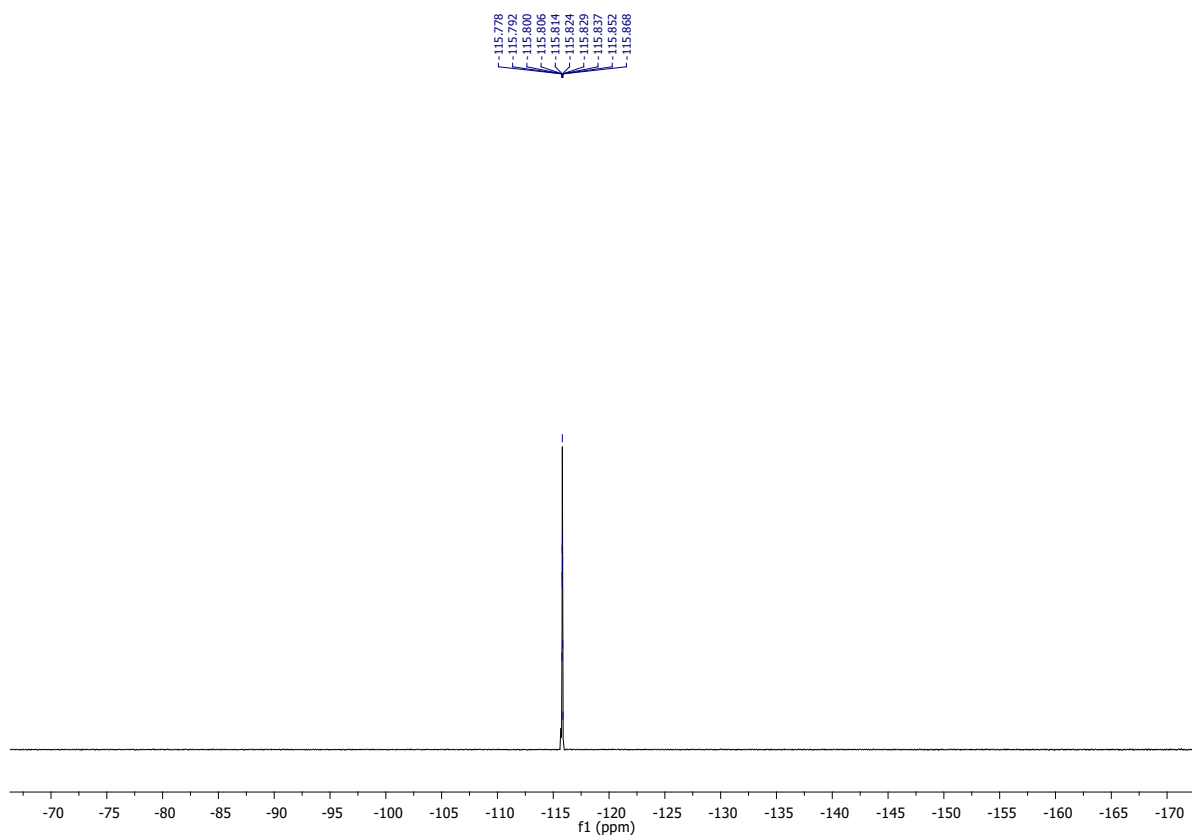

**Figure S33.**  $^1\text{H}$ ,  $^{13}\text{C}$  and  $^{19}\text{F}$  NMR spectra of 4-Fluorobiphenyl ( $\text{CDCl}_3$ ).

7.710  
7.630  
7.625  
7.607  
7.514  
7.381  
7.374  
7.443  
7.424  
7.258

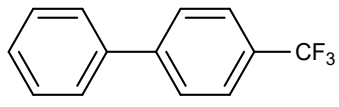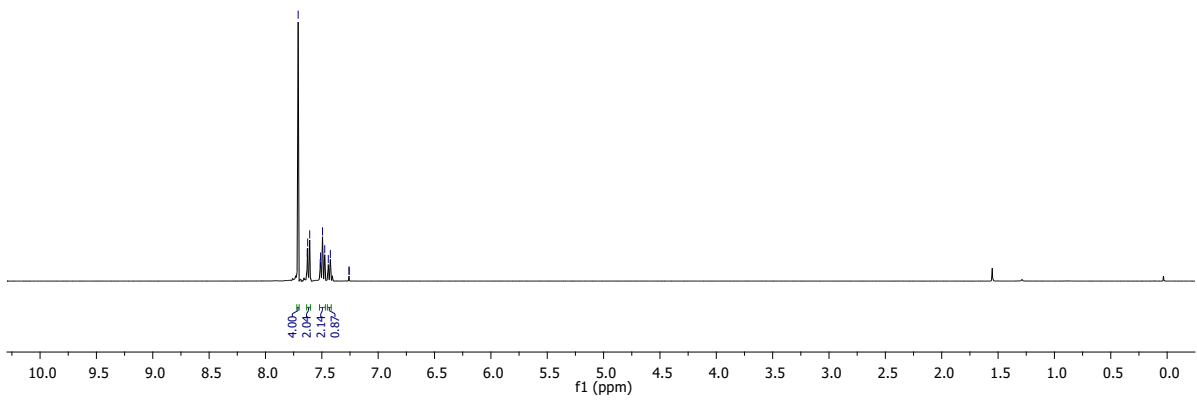

139.755  
128.969  
128.169  
127.402  
127.262  
125.746  
125.708  
125.670  
125.632  
77.324  
77.006  
76.688

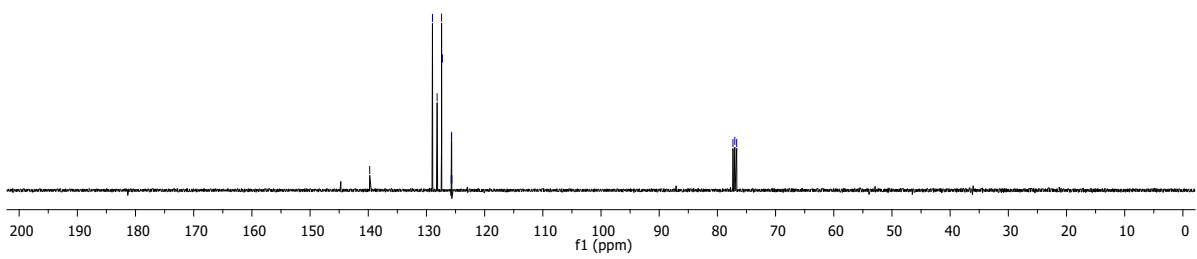

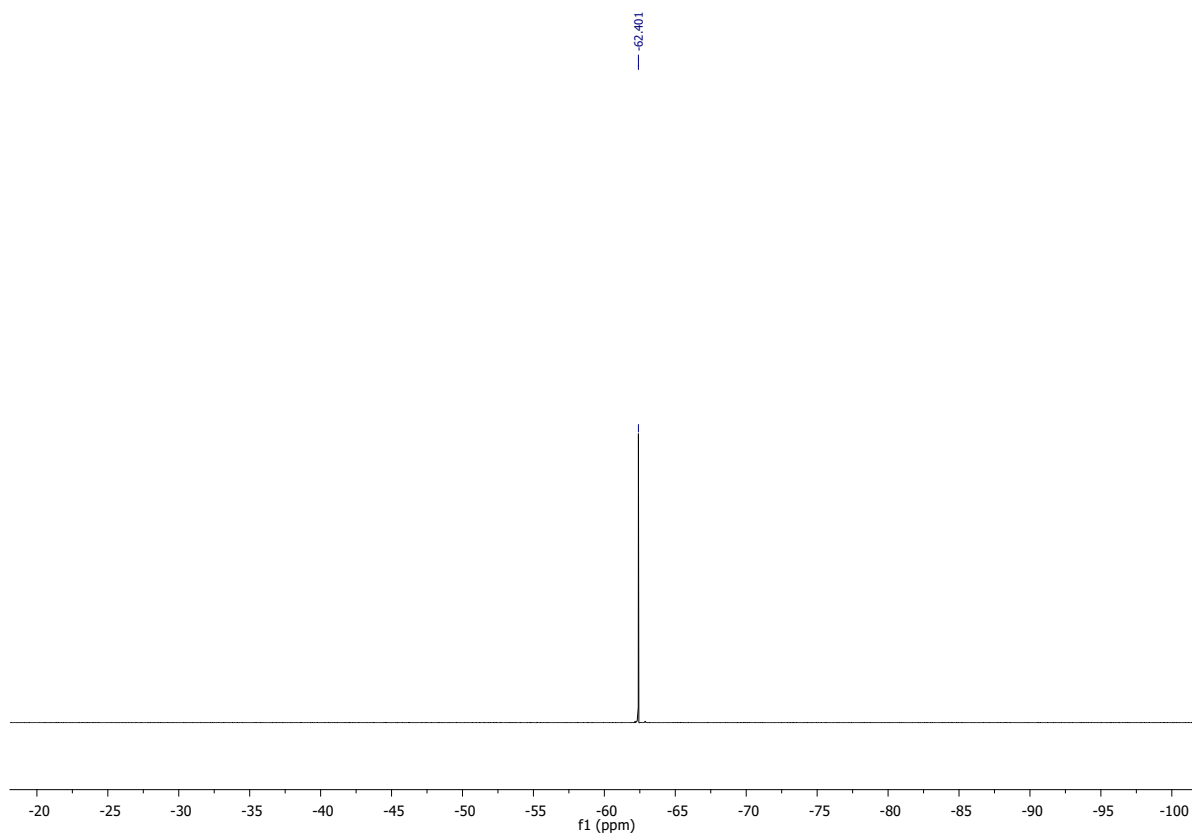

**Figure S34.**  $^1\text{H}$ ,  $^{13}\text{C}$  and  $^{19}\text{F}$  NMR spectrums of 4-(Trifluoromethyl)biphenyl ( $\text{CDCl}_3$ ).



7.613  
7.608  
7.593  
7.591  
7.586  
7.584  
7.578  
7.575  
7.563  
7.562  
7.555  
7.477  
7.475  
7.459  
7.457  
7.439  
7.397  
7.377  
7.366  
7.358  
7.304  
7.302  
7.282  
7.260  
7.257

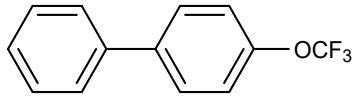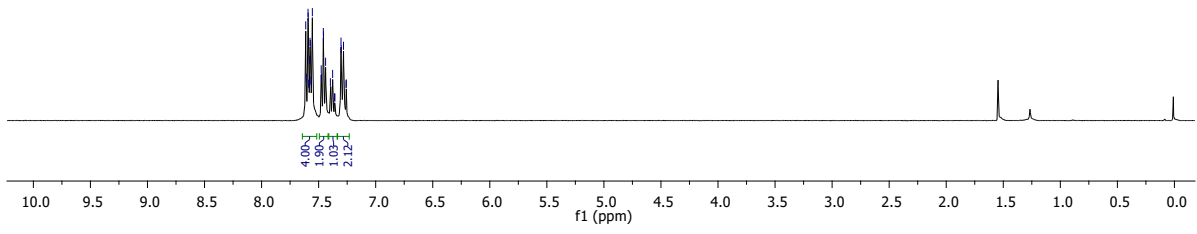

148.649  
139.675  
139.642  
128.881  
127.654  
127.097  
121.821  
121.209  
119.266

77.321  
77.003  
76.686

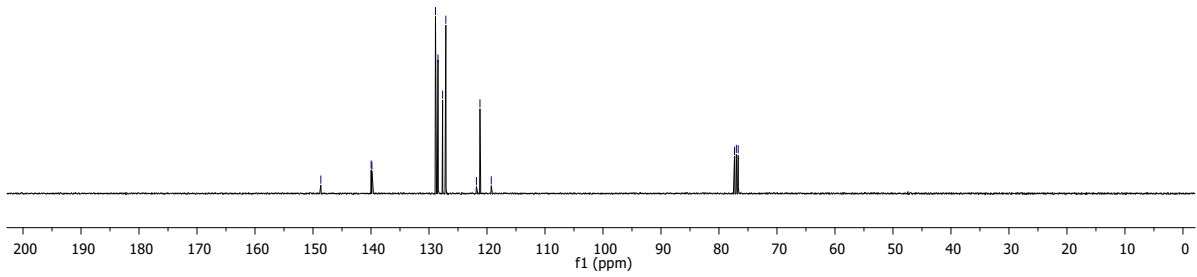

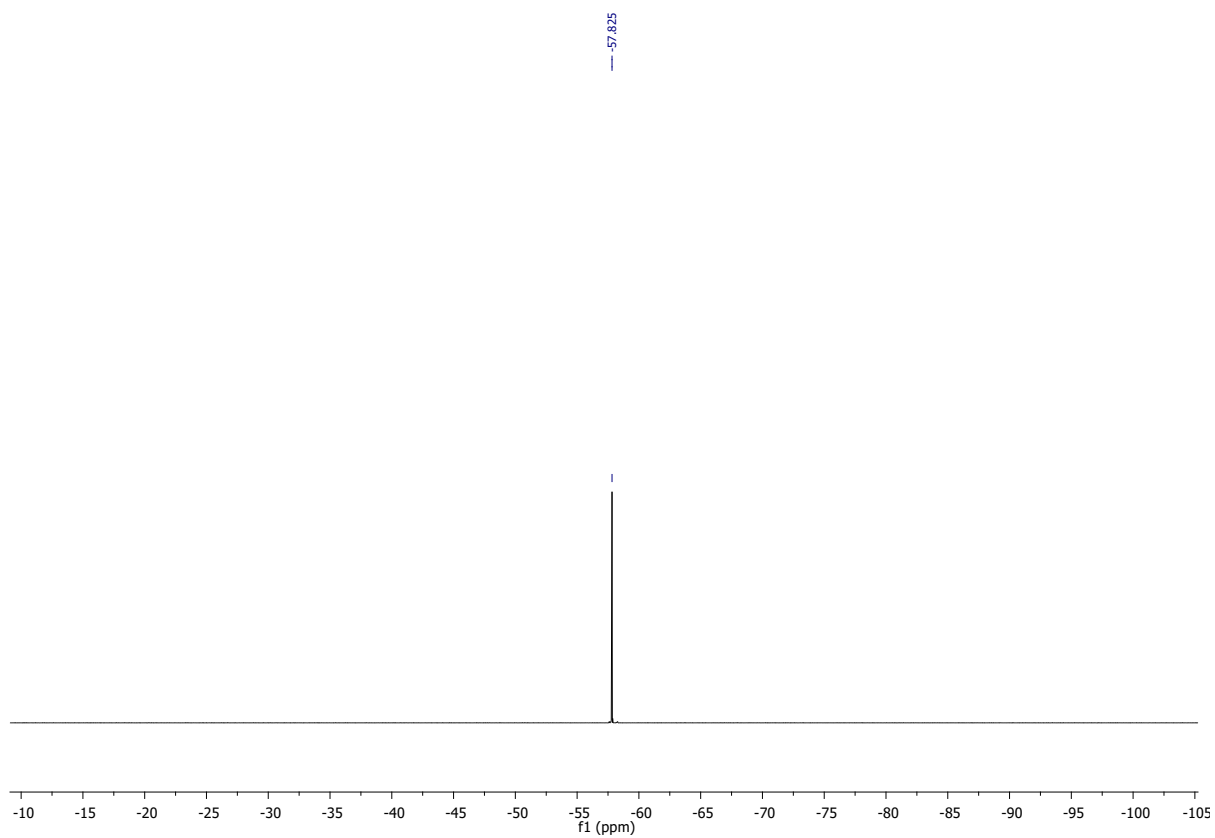

**Figure S35.**  $^1\text{H}$ ,  $^{13}\text{C}$  and  $^{19}\text{F}$  NMR spectrums of 4-(Trifluoromethoxy)biphenyl ( $\text{CDCl}_3$ ).

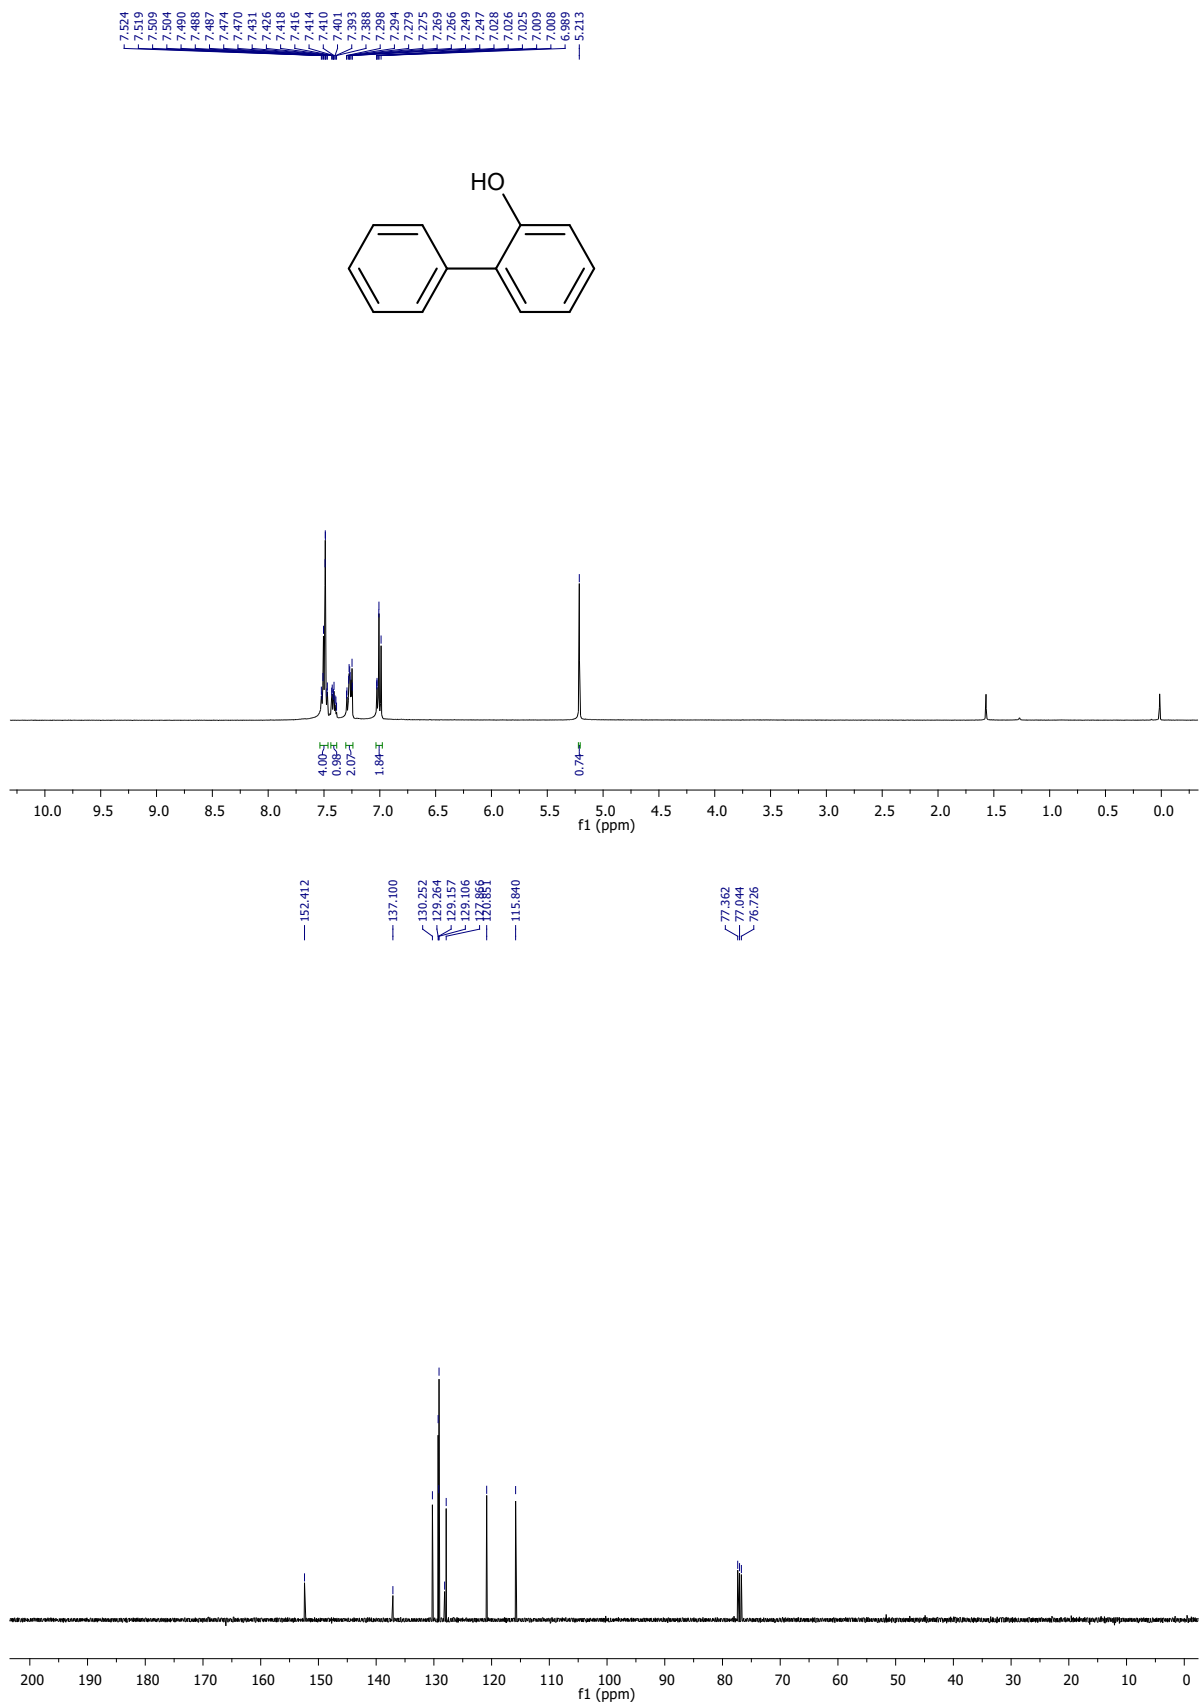

Figure S36. <sup>1</sup>H and <sup>13</sup>C NMR spectra of 2-Hydroxybiphenyl (CDCl<sub>3</sub>).

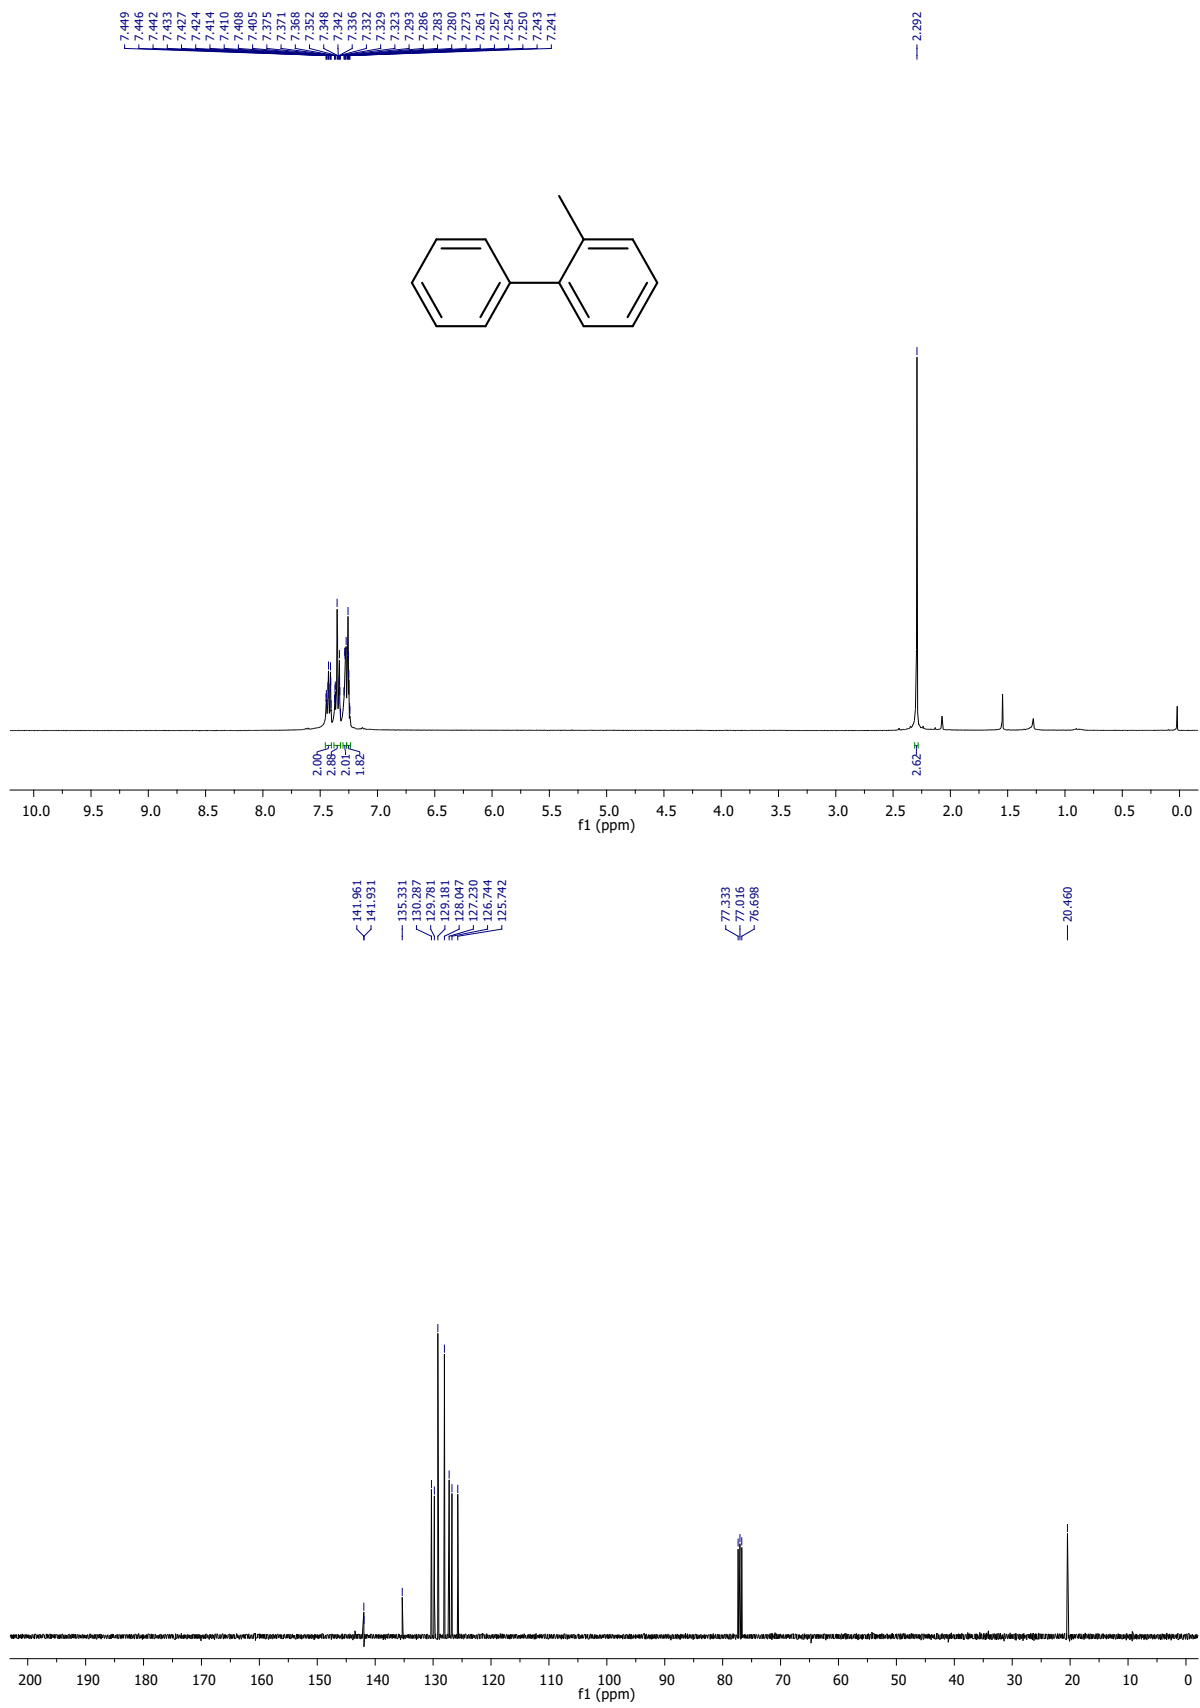

Figure S37. <sup>1</sup>H and <sup>13</sup>C NMR spectra of 2-Methylbiphenyl (CDCl<sub>3</sub>).

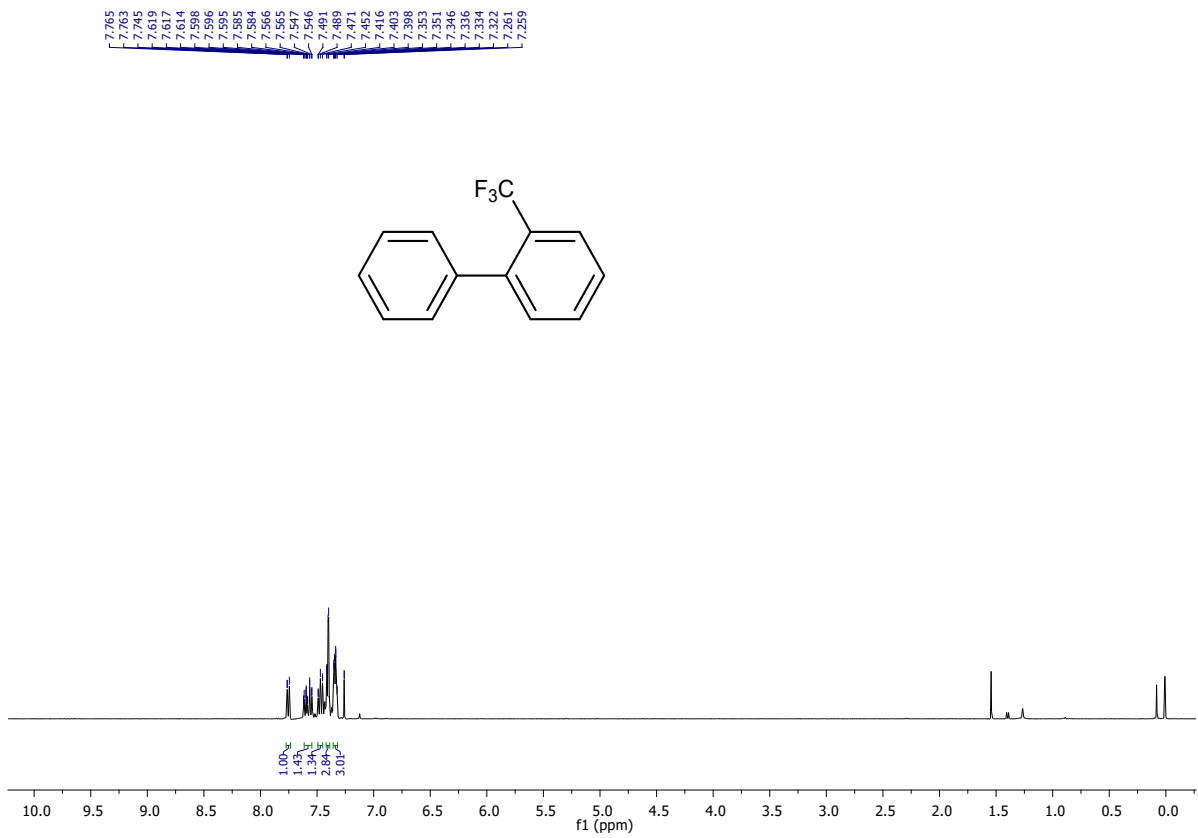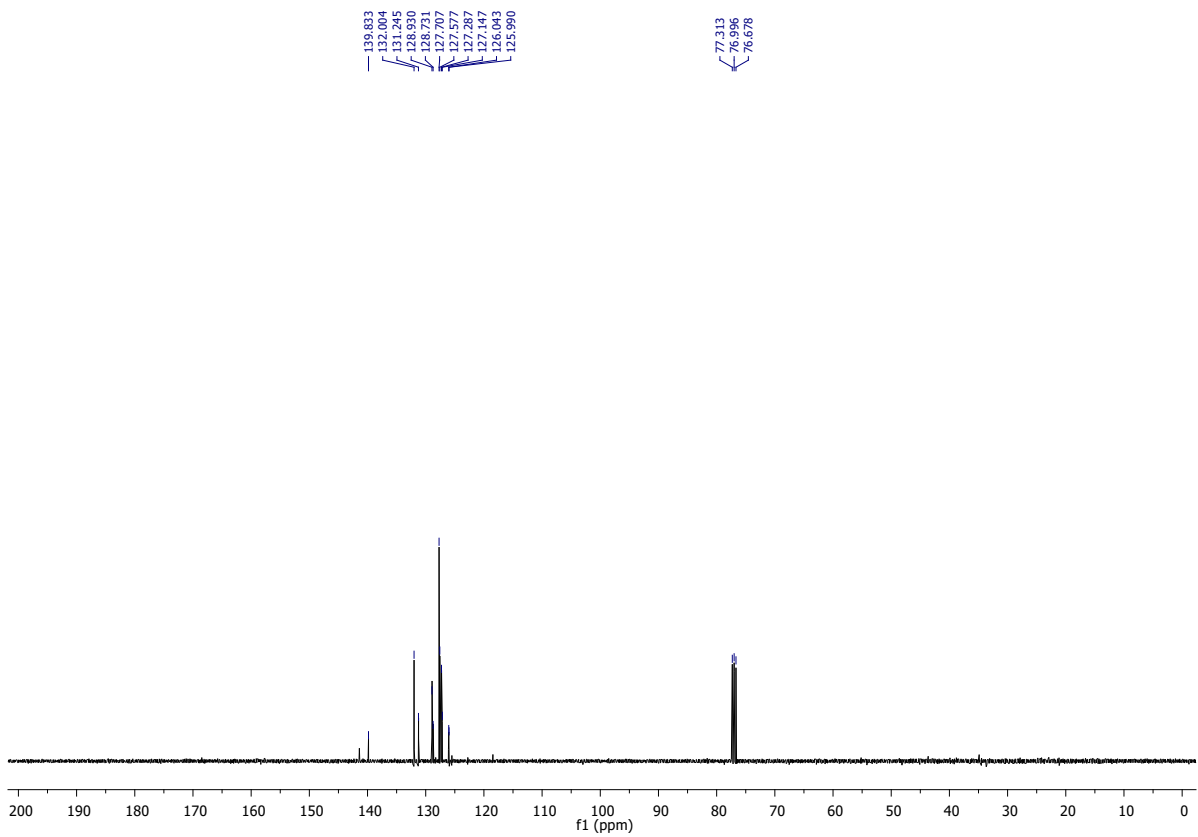

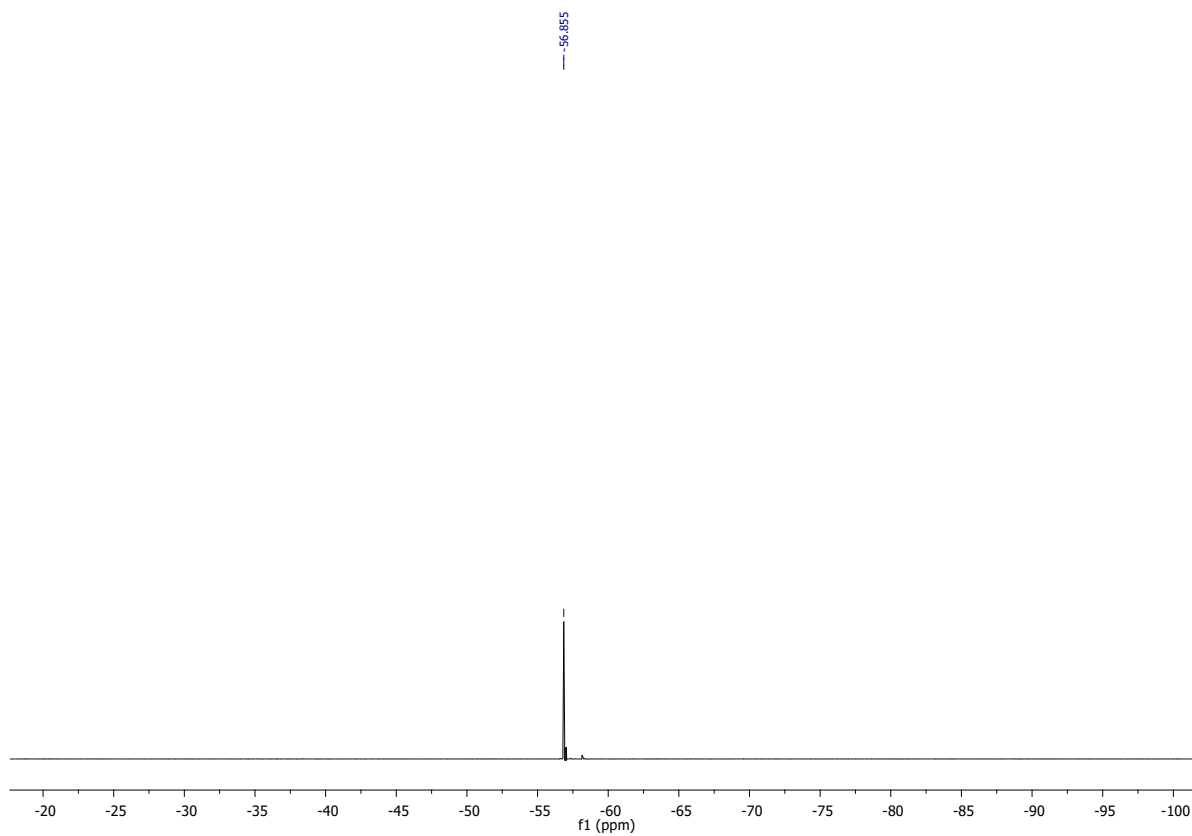

**Figure S38.**  $^1\text{H}$ ,  $^{13}\text{C}$  and  $^{19}\text{F}$  NMR spectrums of 2-(Trifluoromethyl)biphenyl ( $\text{CDCl}_3$ ).

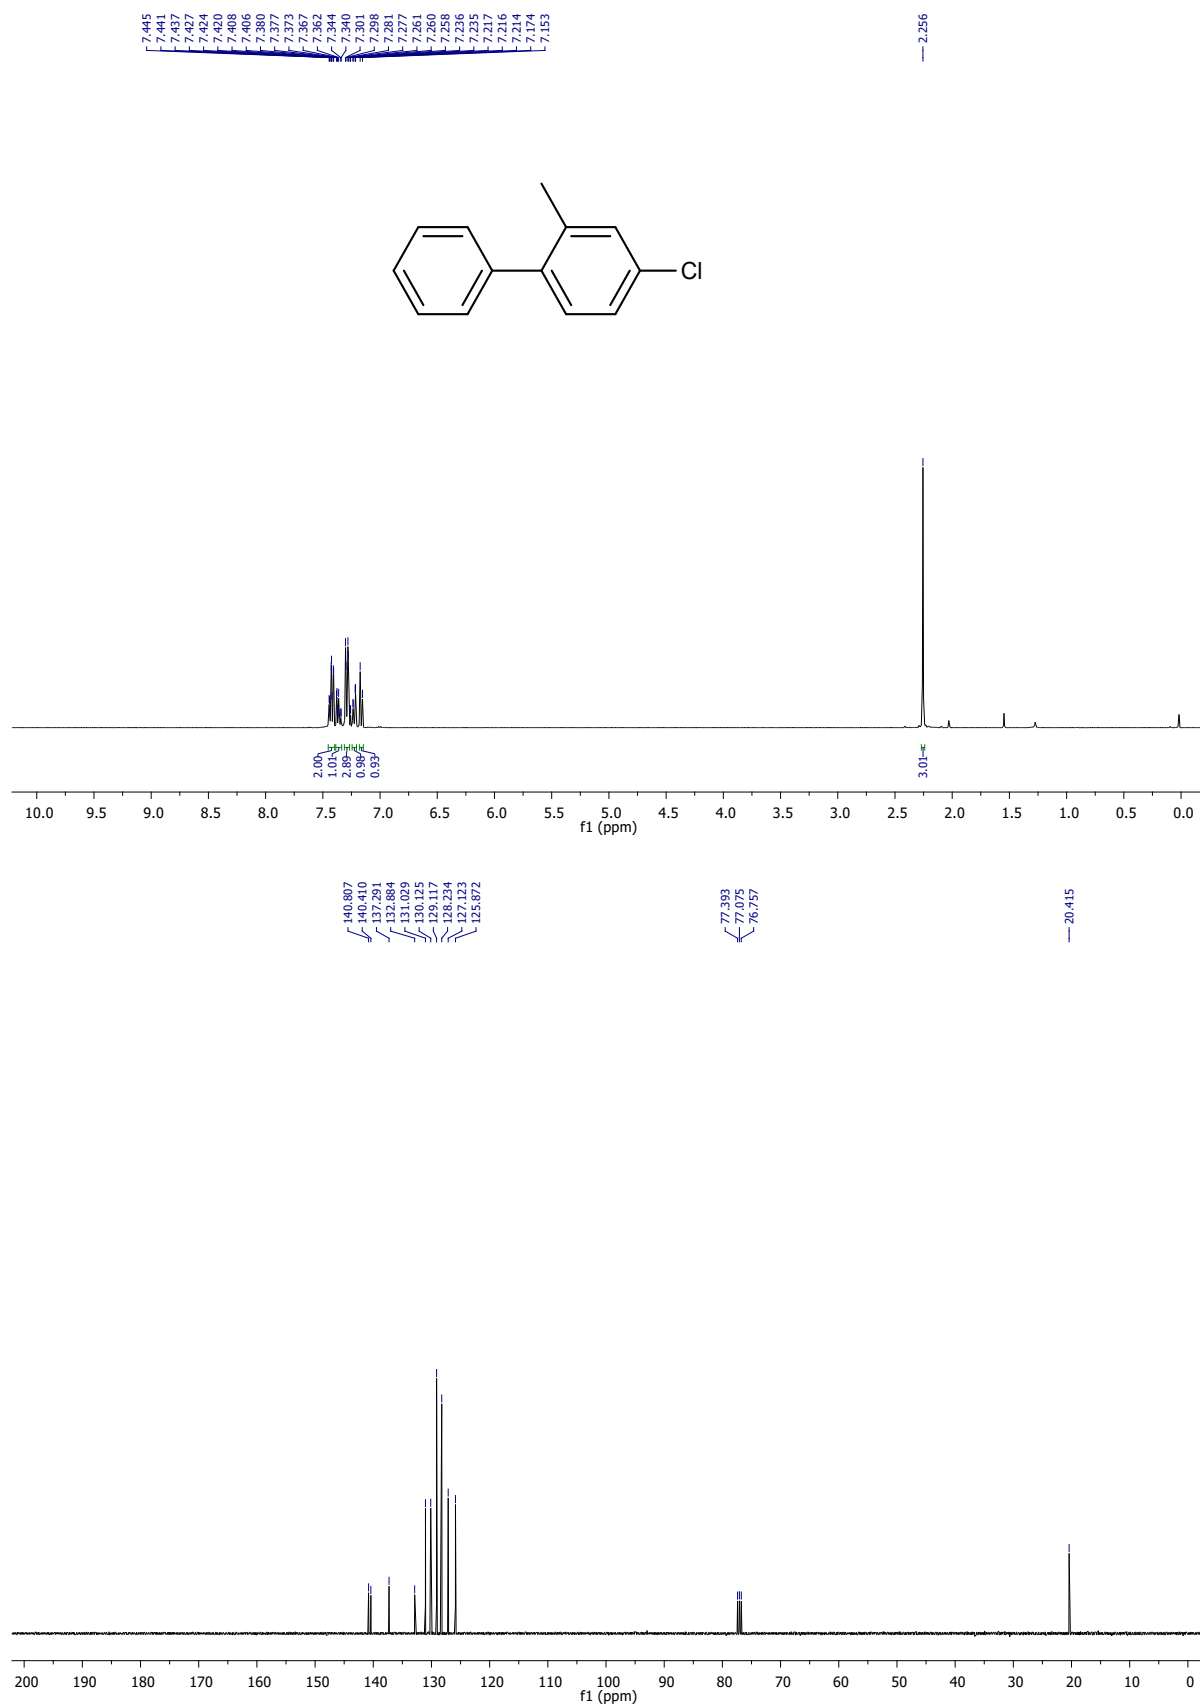

Figure S39. <sup>1</sup>H and <sup>13</sup>C NMR spectra of 4-Chloro-2-methylbiphenyl (CDCl<sub>3</sub>).

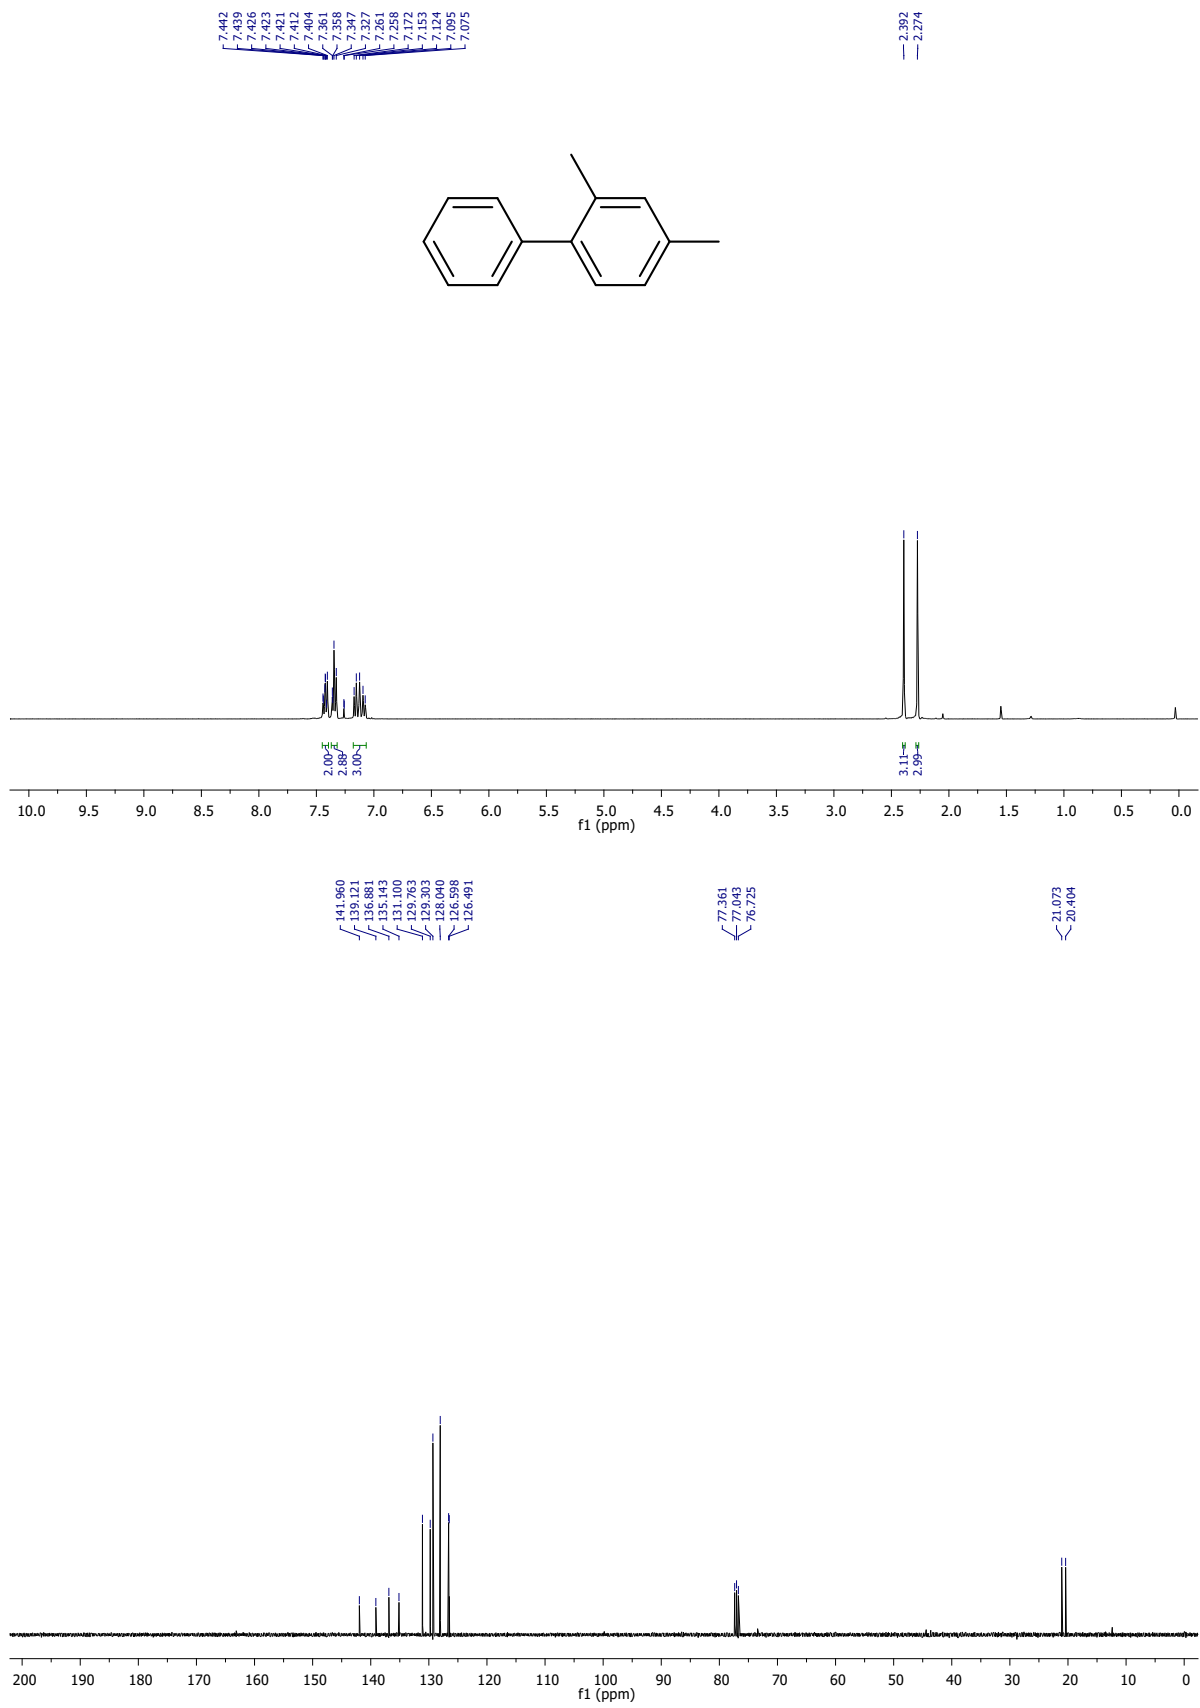

Figure S40. <sup>1</sup>H and <sup>13</sup>C NMR spectra of 2,4-Methylbiphenyl (CDCl<sub>3</sub>).



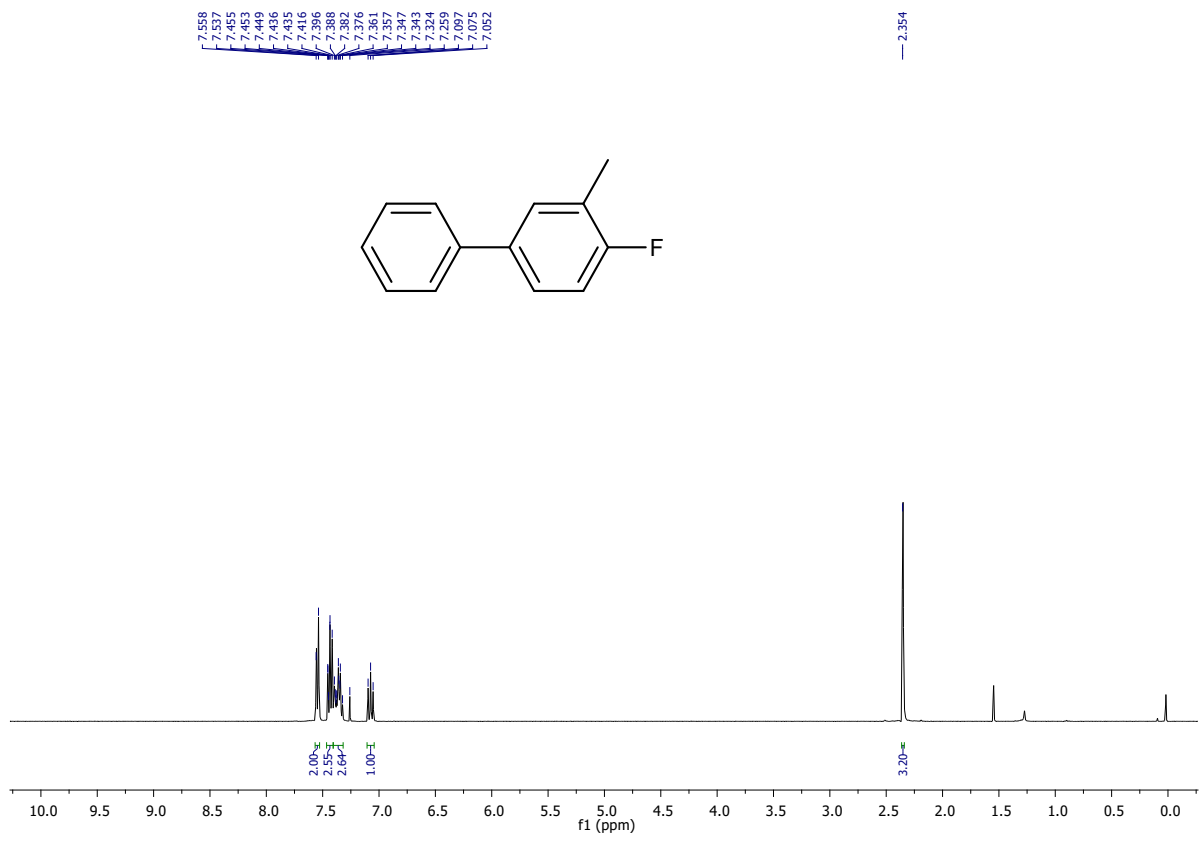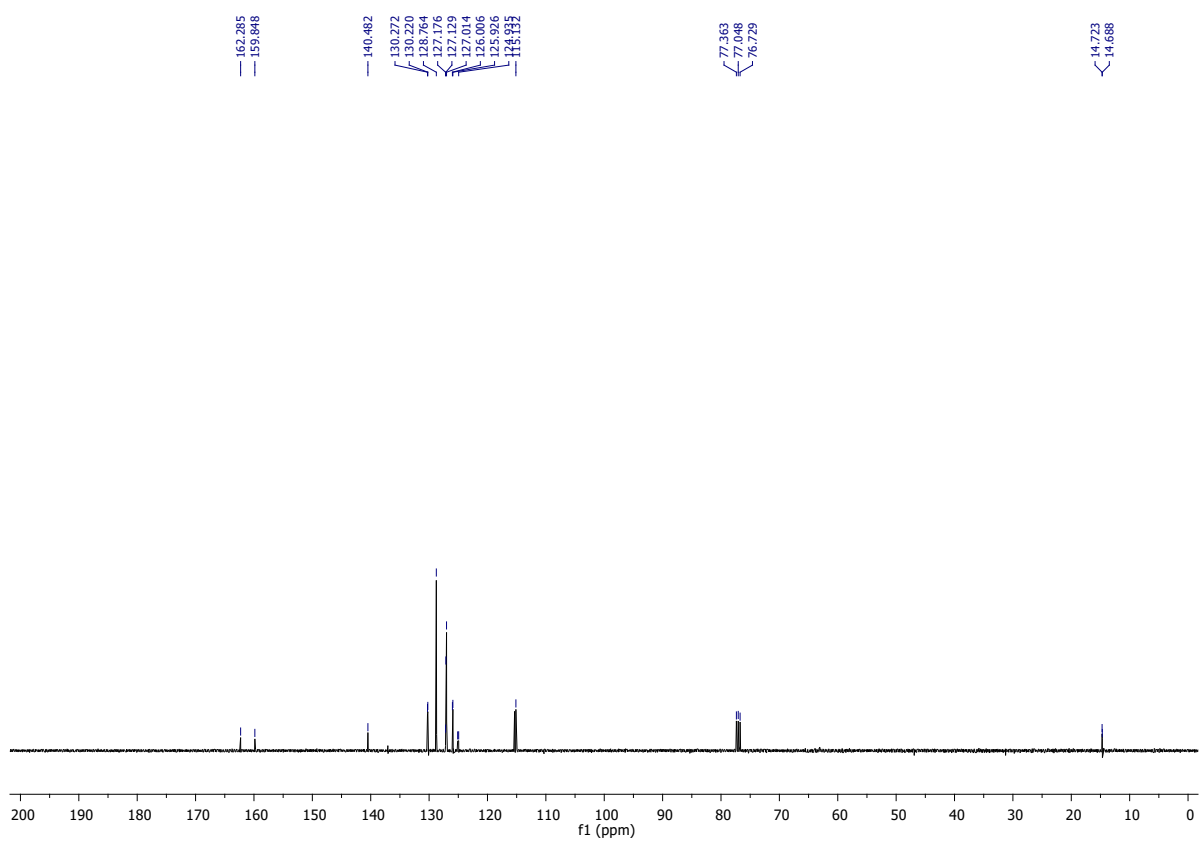

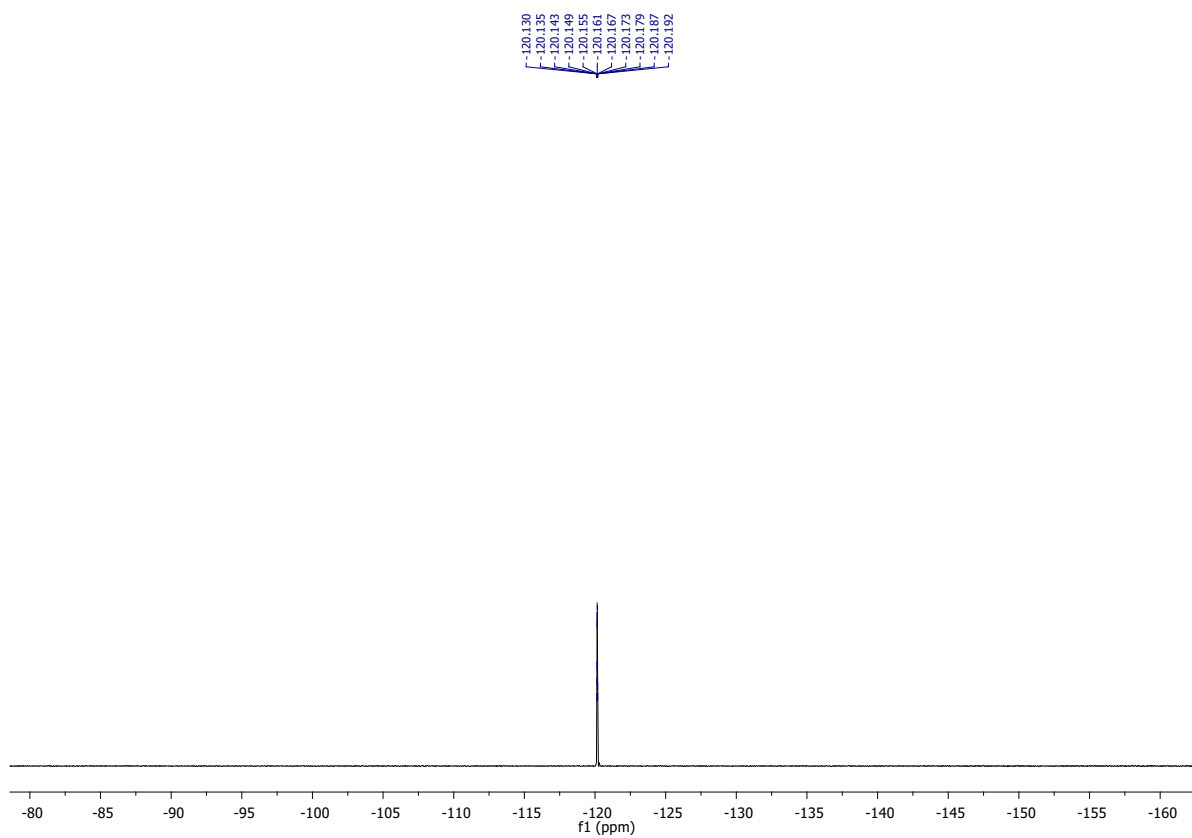

**Figure S41.**  $^1\text{H}$ ,  $^{13}\text{C}$  and  $^{19}\text{F}$  NMR spectrums of 4-Fluoro-3-methylbiphenyl ( $\text{CDCl}_3$ ).

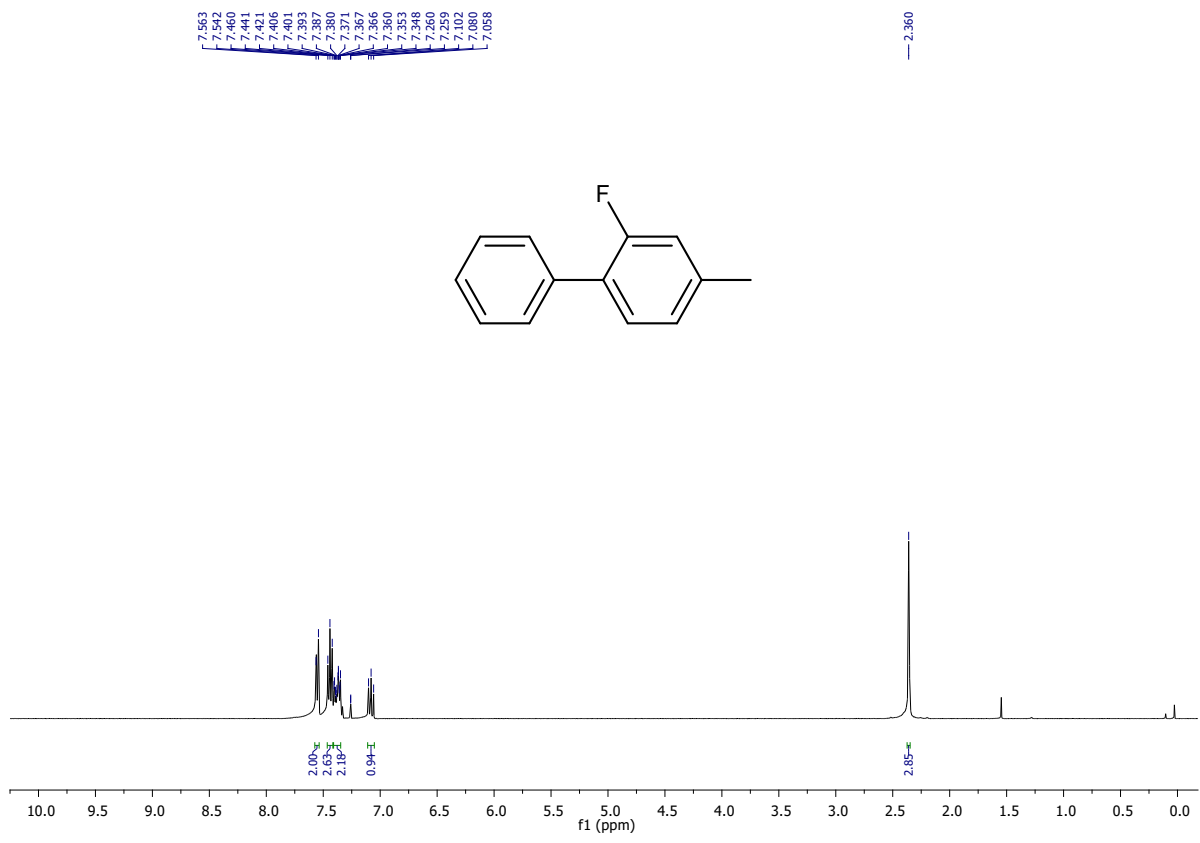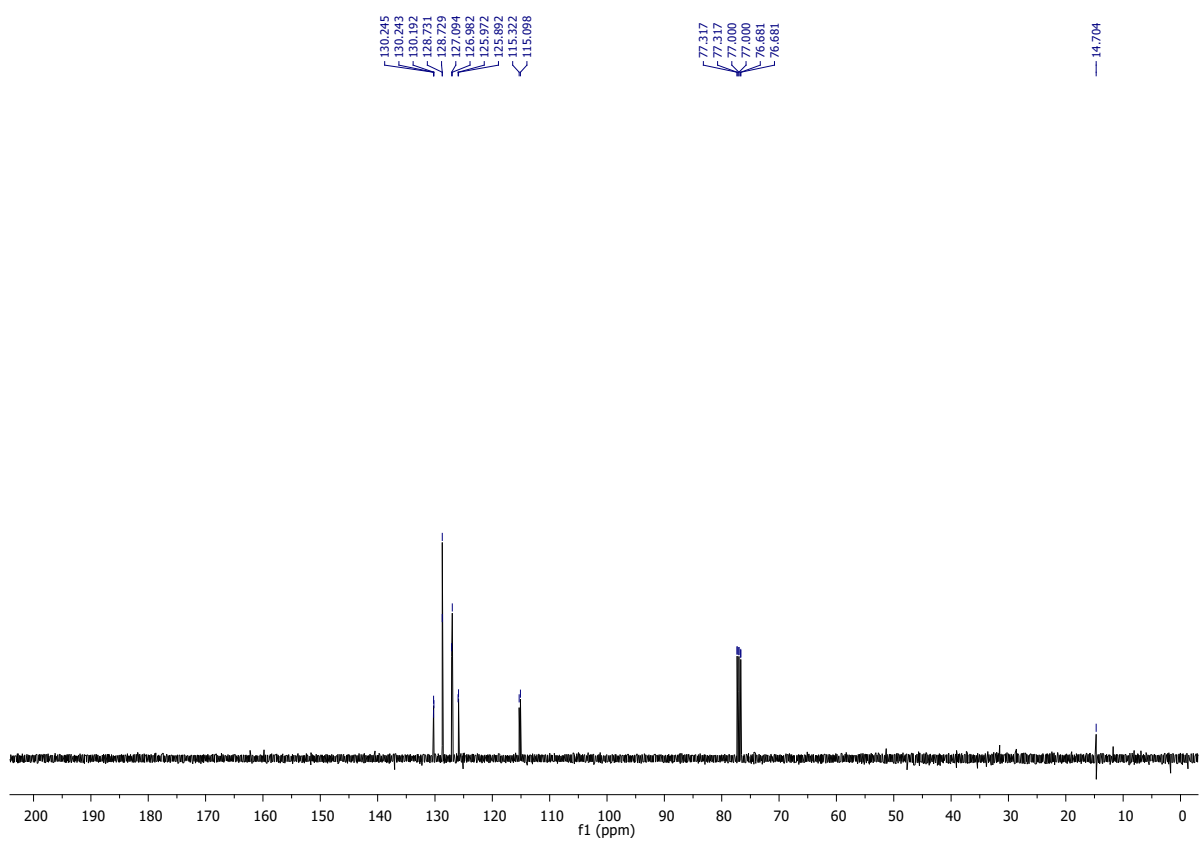

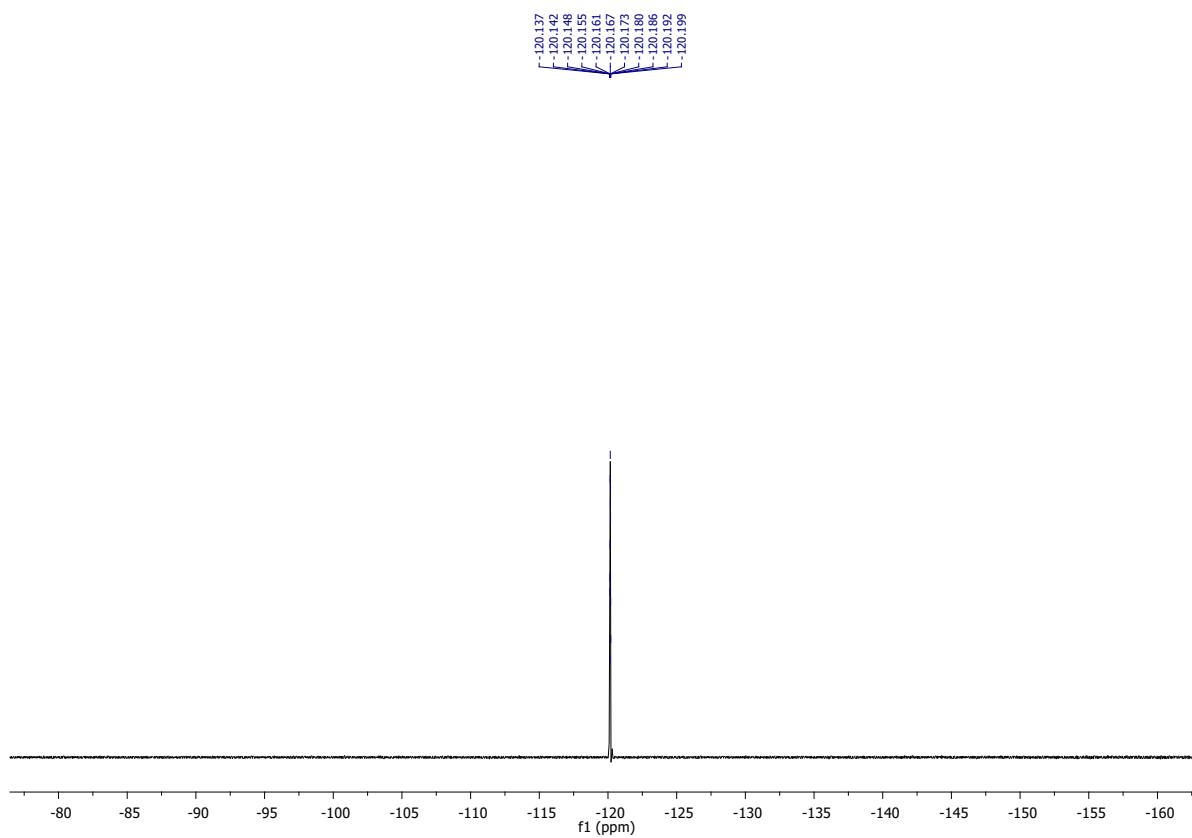

**Figure S42.**  $^1\text{H}$ ,  $^{13}\text{C}$  and  $^{19}\text{F}$  NMR spectrums of 2-Fluoro-4-methylbiphenyl ( $\text{CDCl}_3$ ).

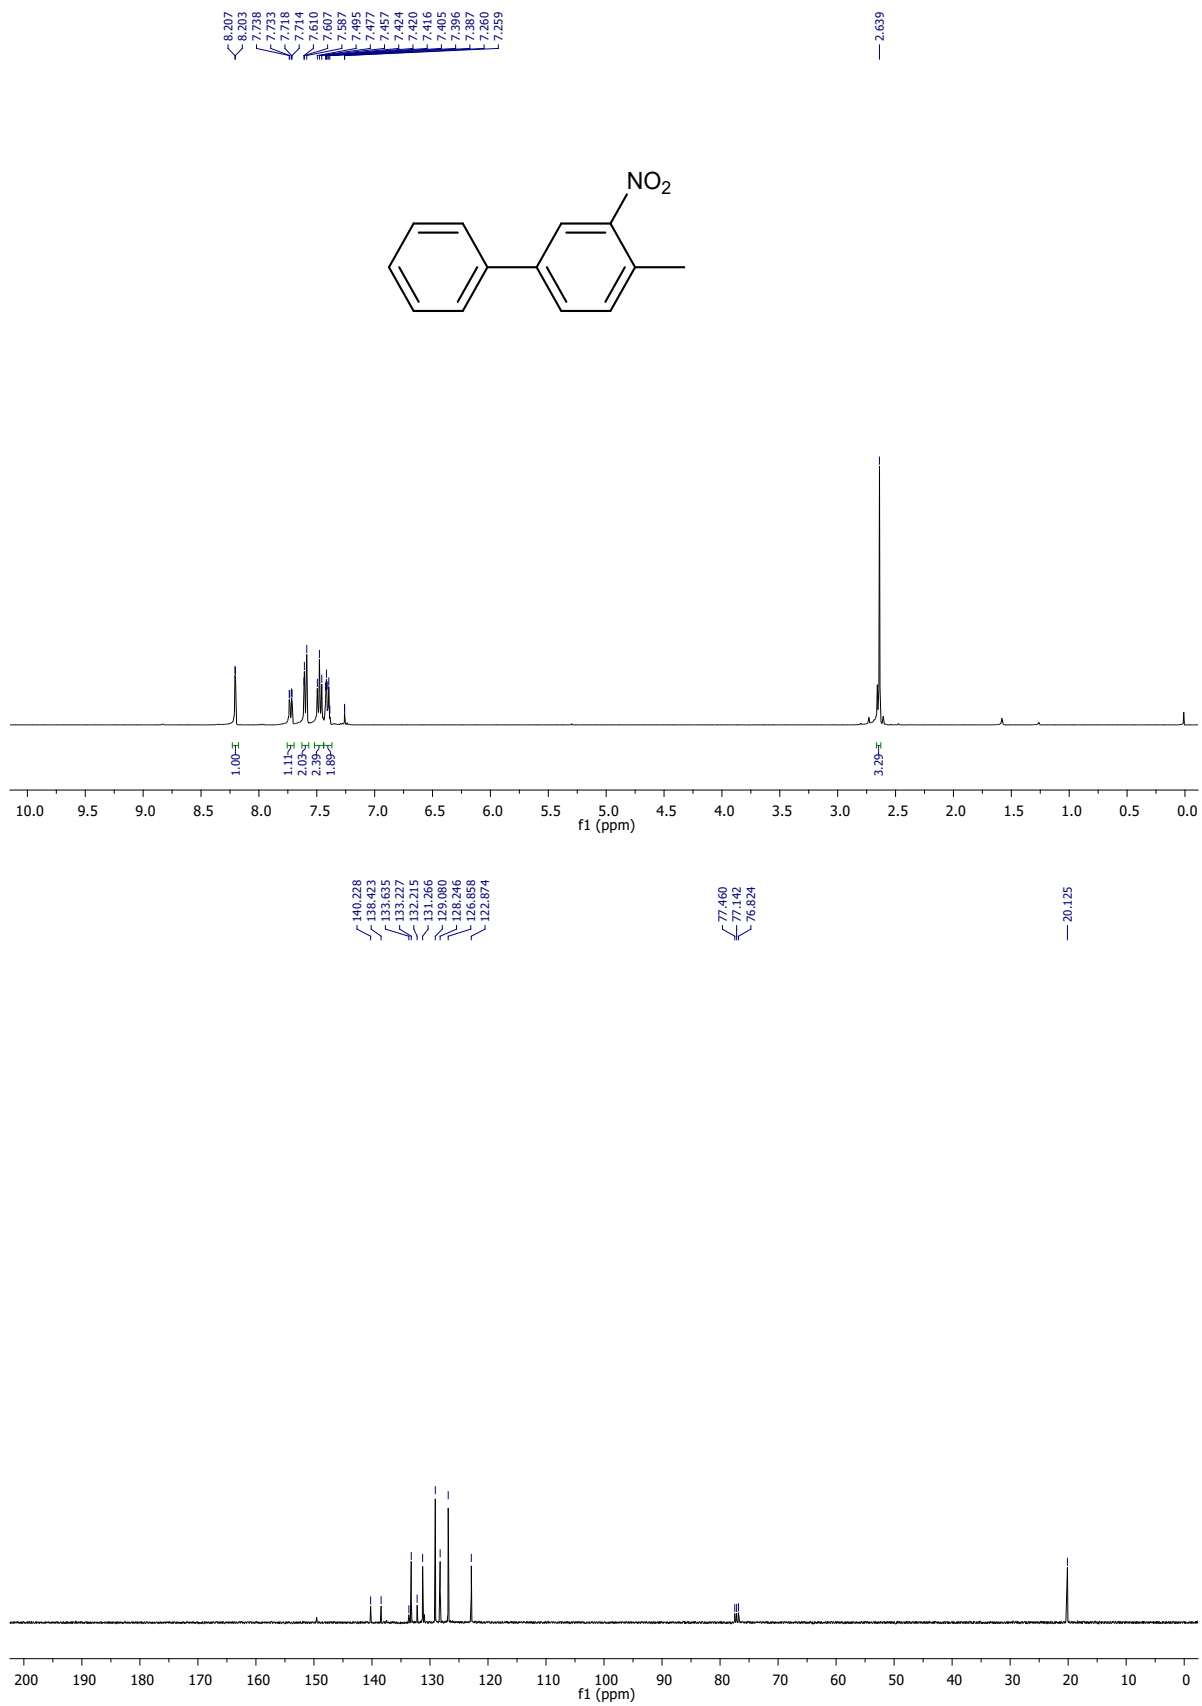

Figure S43. <sup>1</sup>H and <sup>13</sup>C NMR spectra of 4-Methyl-3-nitrophenyl (CDCl<sub>3</sub>).

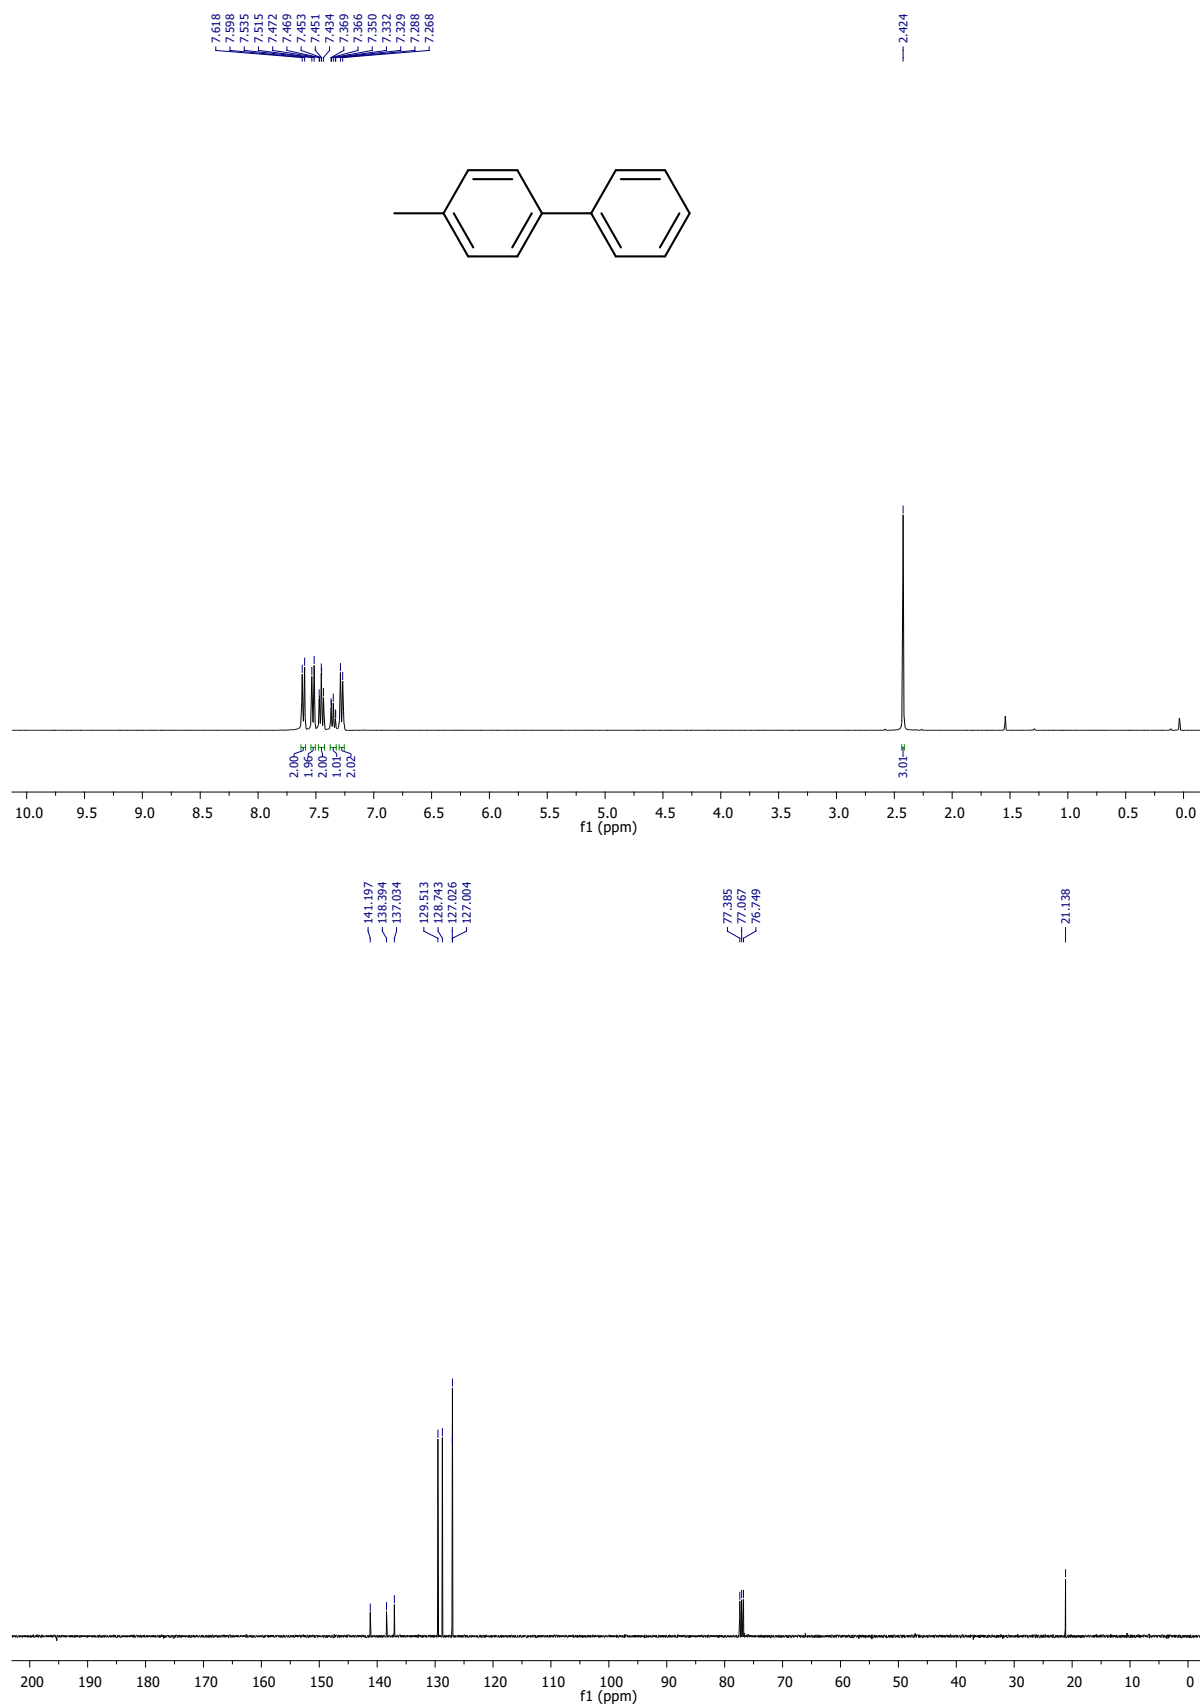

Figure S44. <sup>1</sup>H and <sup>13</sup>C NMR spectra of 4'-Methylbiphenyl (CDCl<sub>3</sub>).

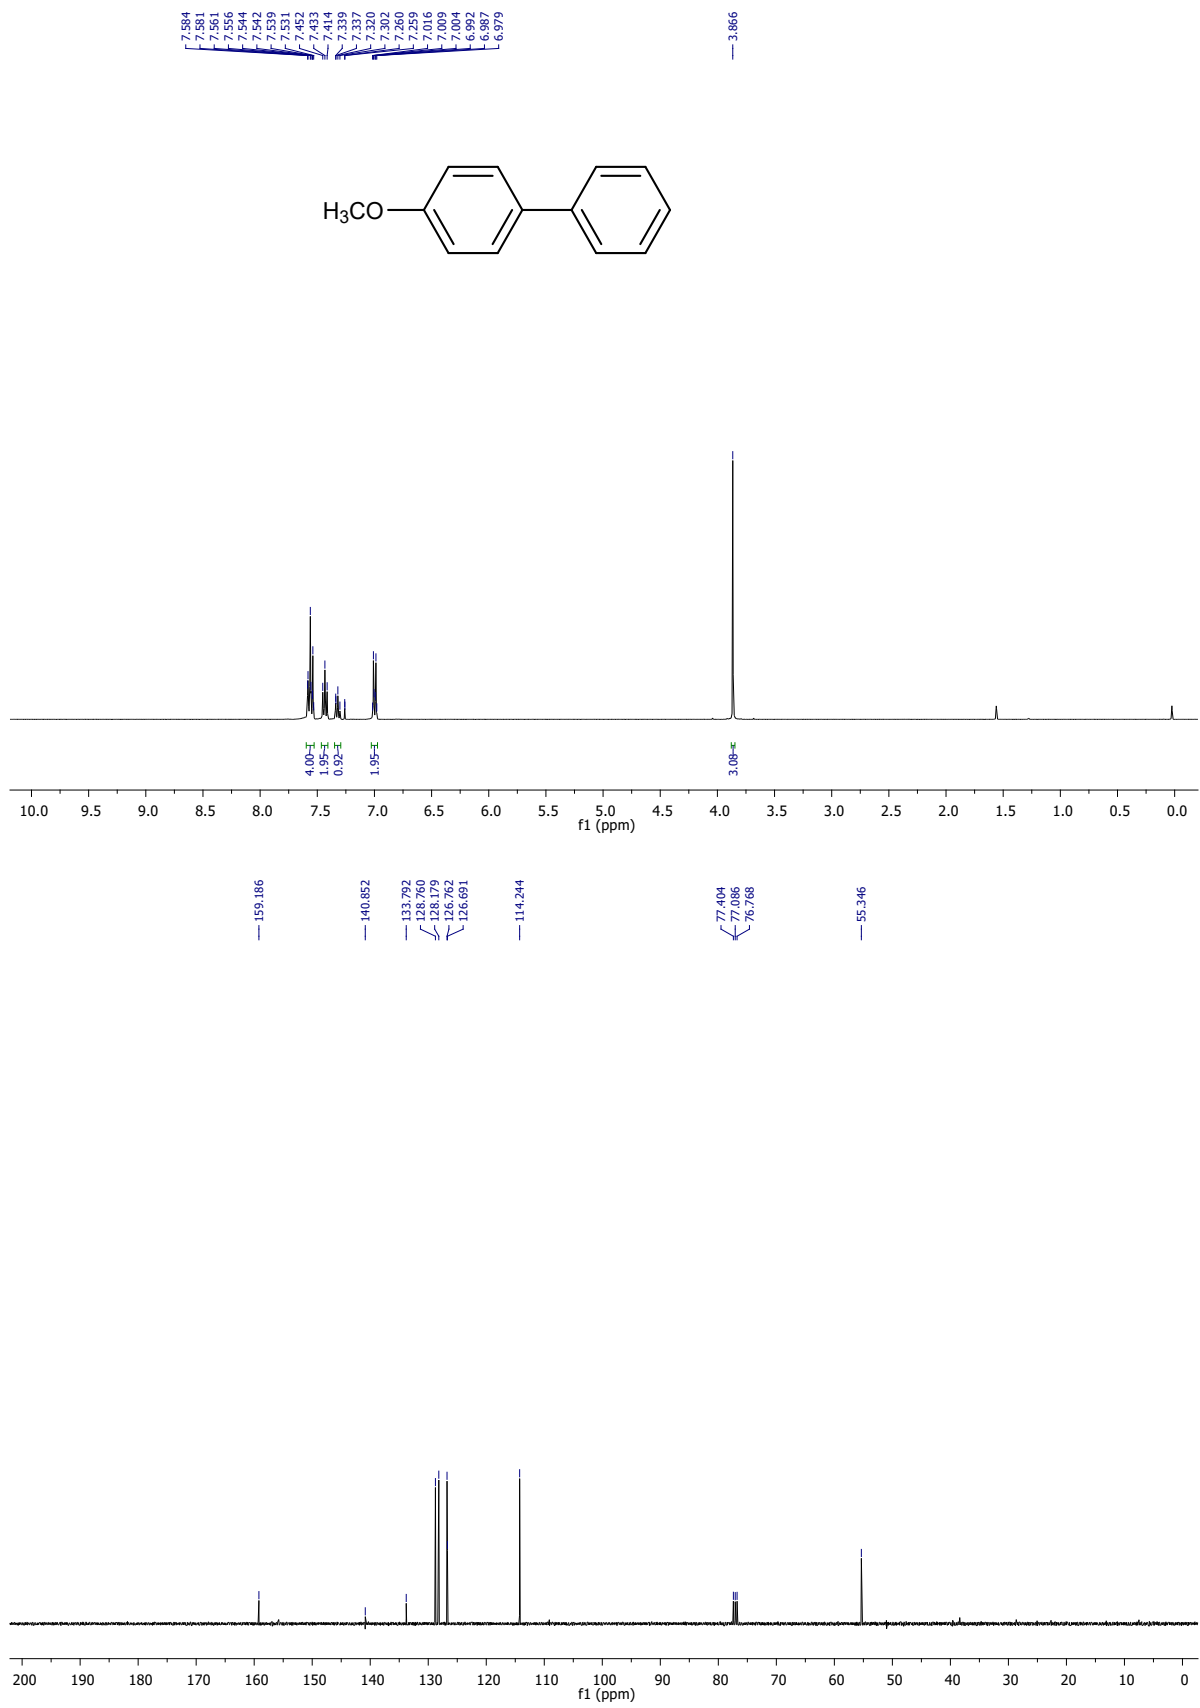

Figure S45. <sup>1</sup>H and <sup>13</sup>C NMR spectra of 4'-Methoxybiphenyl (CDCl<sub>3</sub>).

## FTIR Spectrums

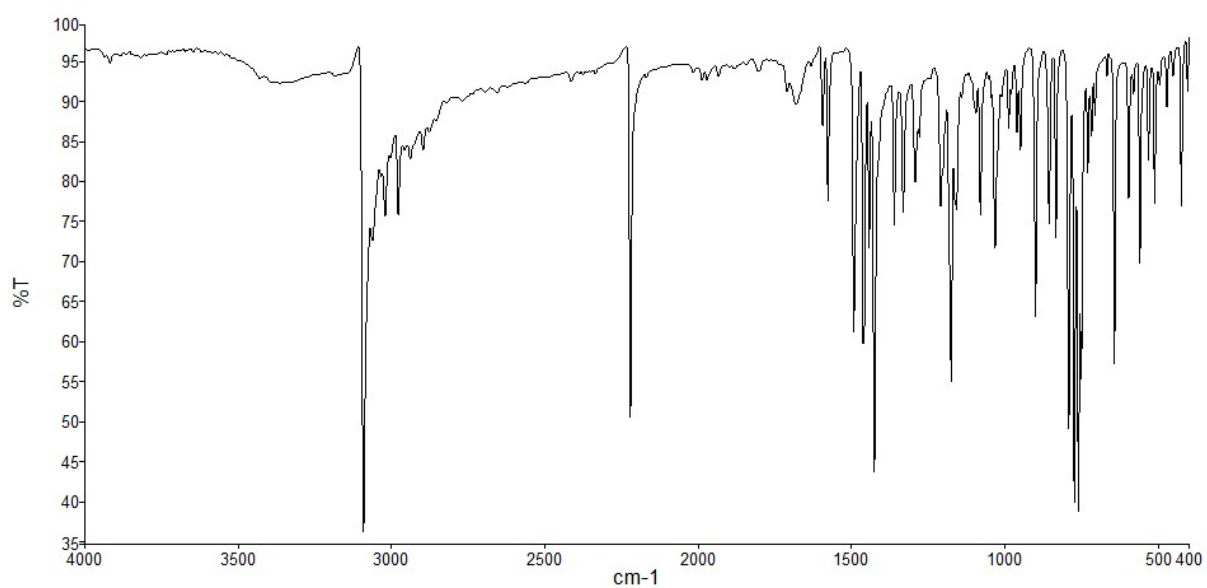

**Figure S46.** IR spectrum of **1a**.

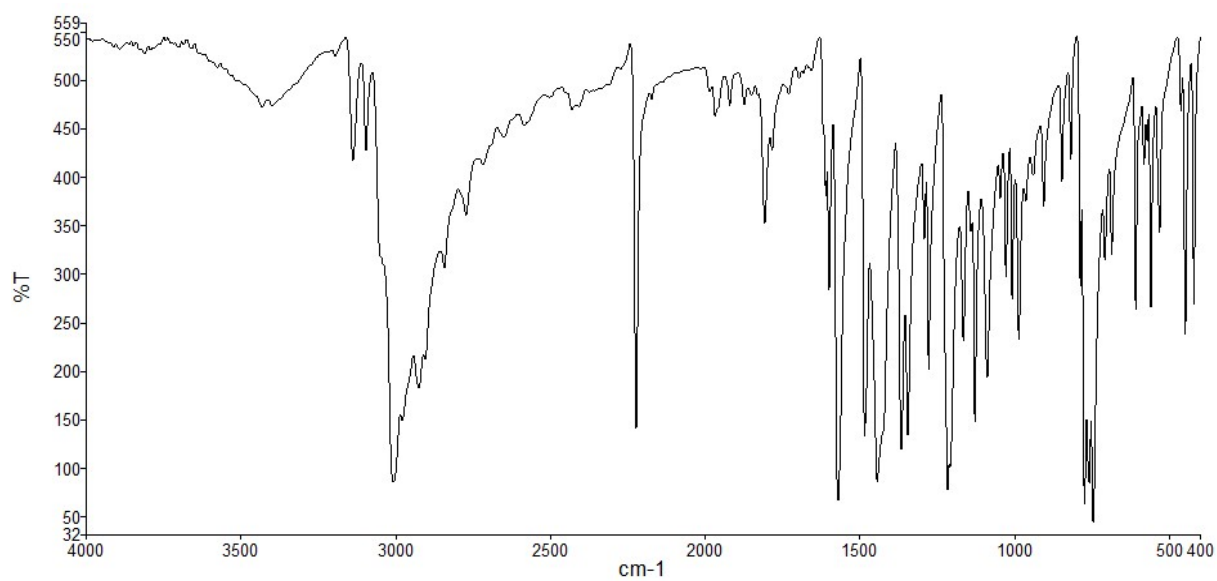

**Figure S47.** IR spectrum of **1b**.



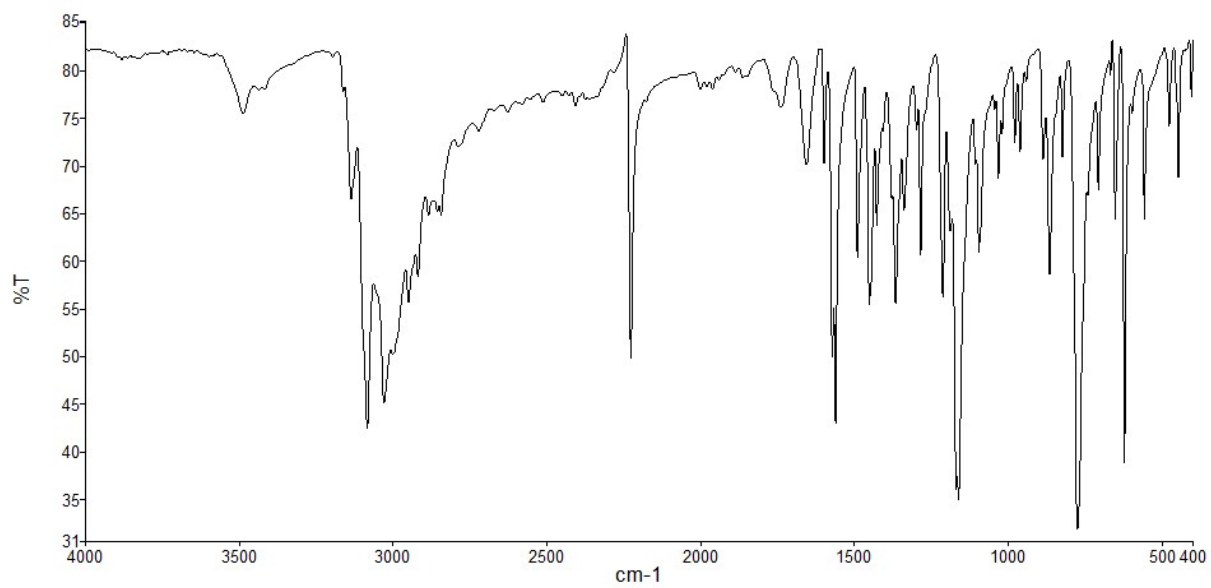

**Figure S48.** IR spectrum of **1c**.

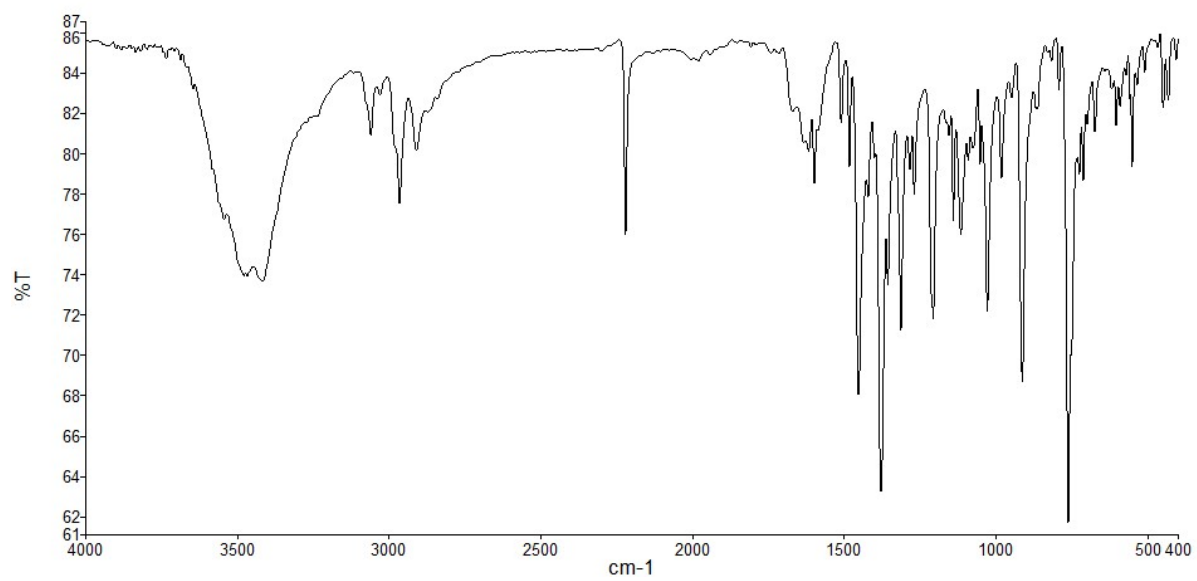

**Figure S49.** IR spectrum of **1d**.

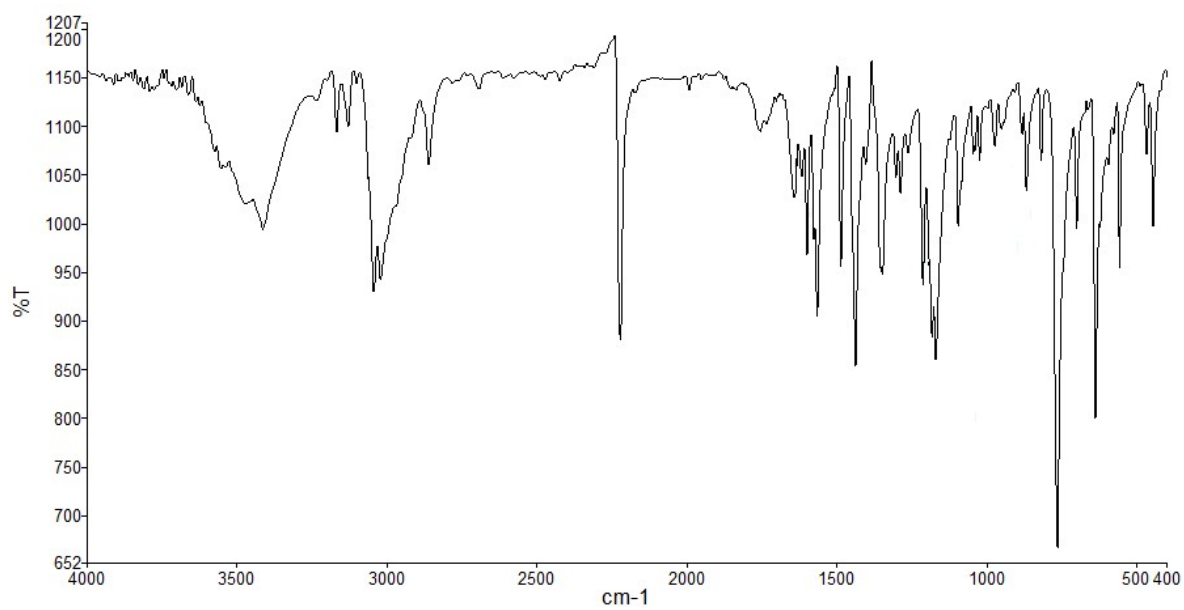

**Figure S50.** IR spectrum of **1e**.

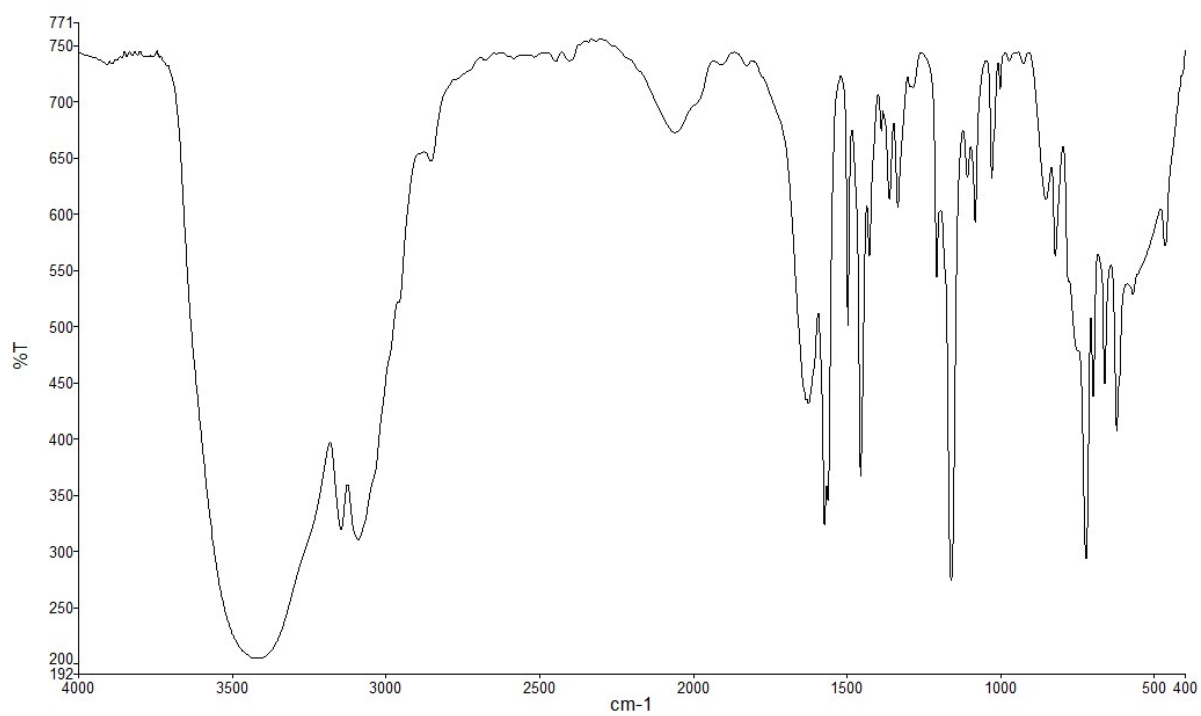

**Figure S51.** IR spectrum of **1f**.

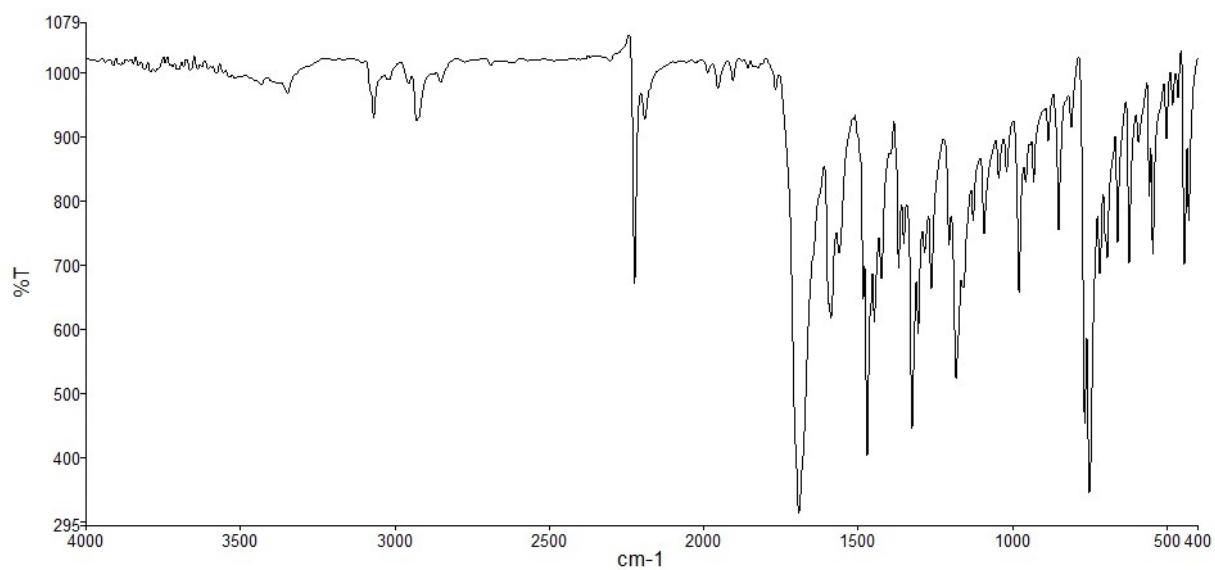

**Figure S52.** IR spectrum of **2a**.

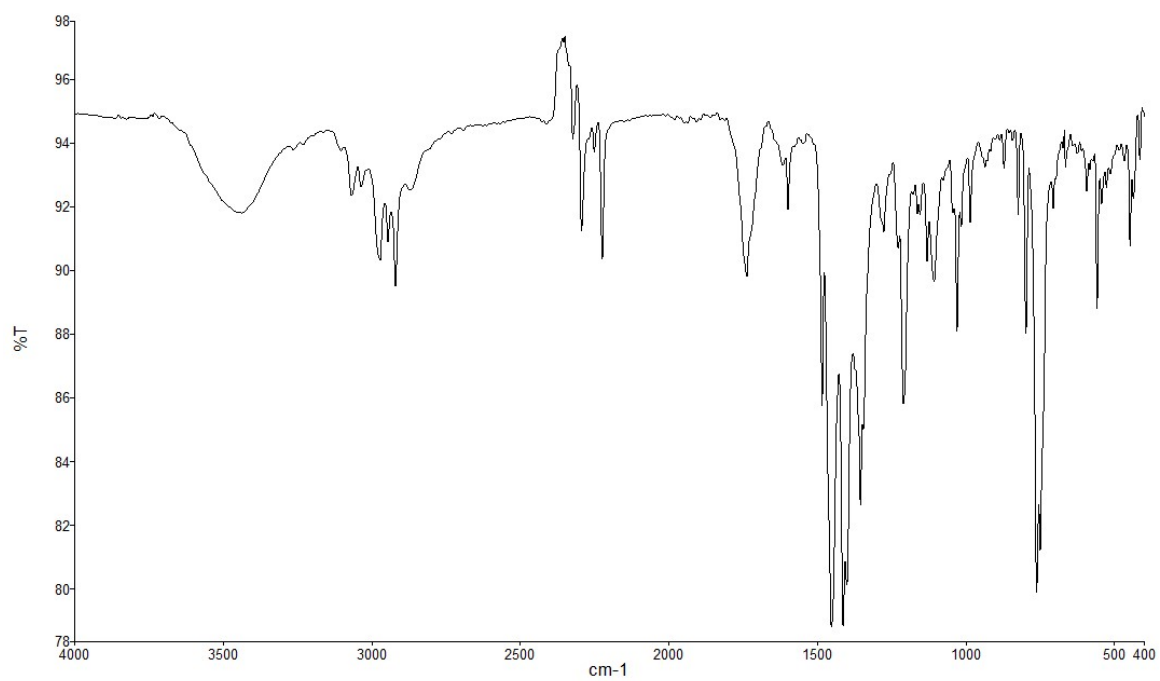

**Figure S53.** IR spectrum of **2b**.

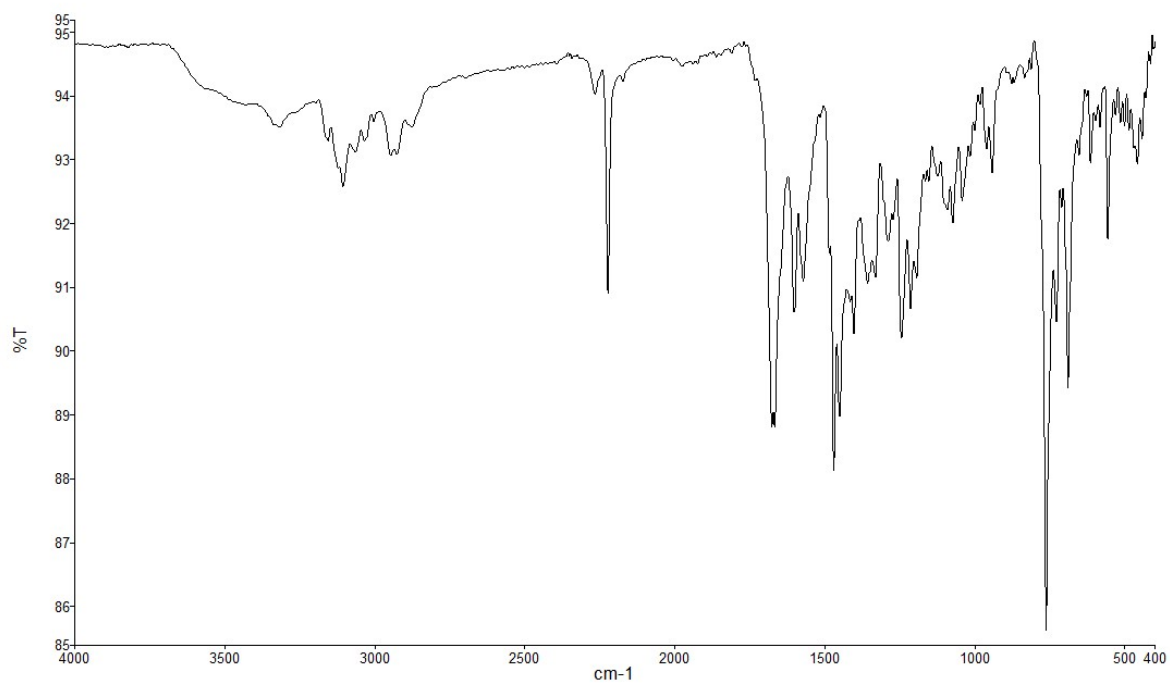

**Figure S54.** IR spectrum of **2c**.

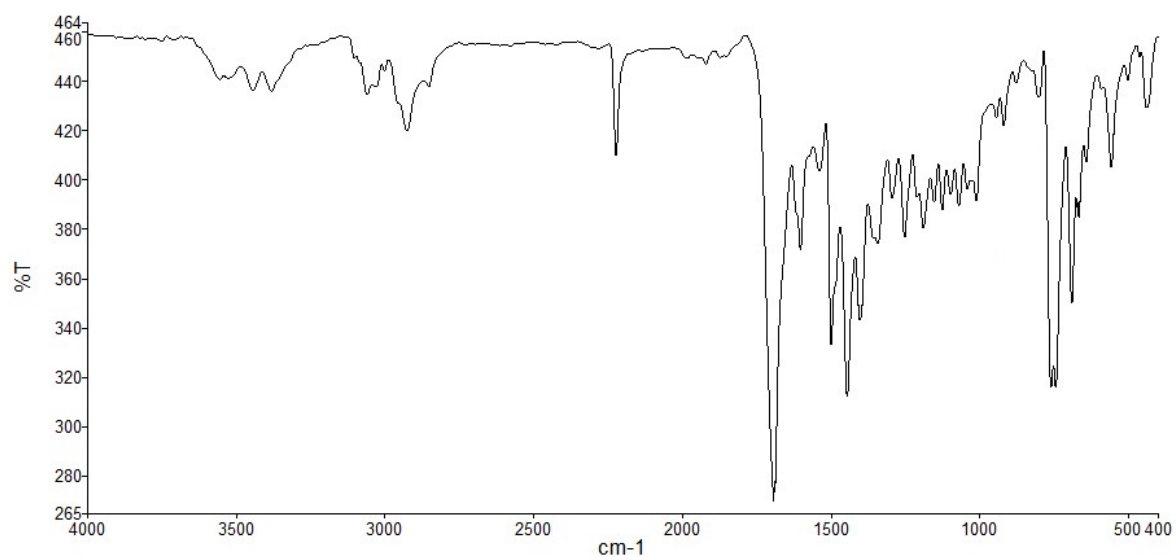

**Figure S55.** IR spectrum of **3b**.

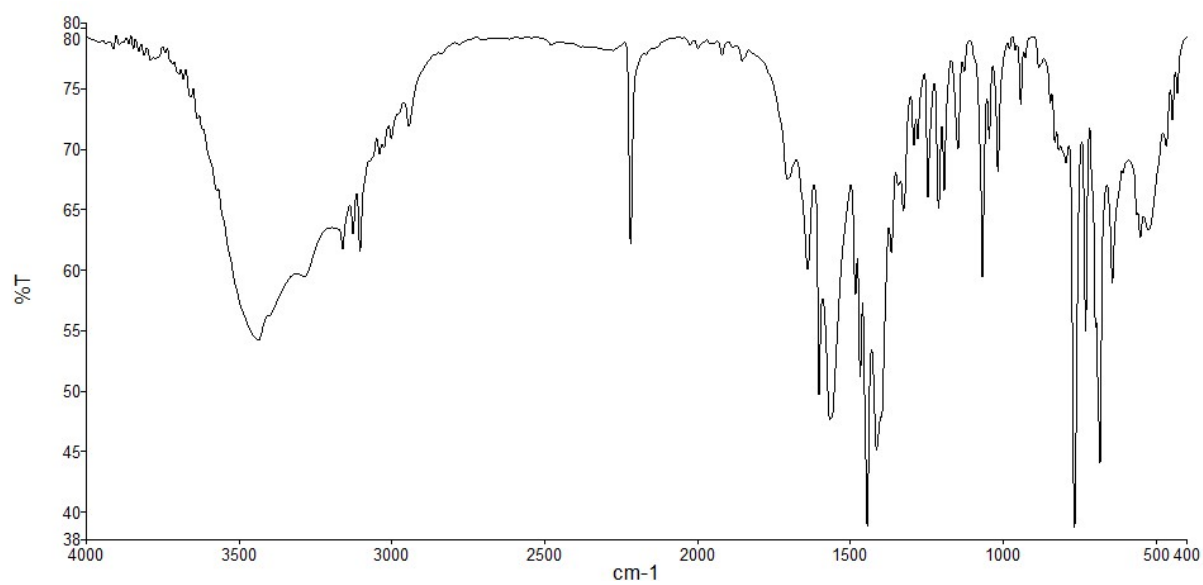

**Figure S56.** IR spectrum of **3c**.

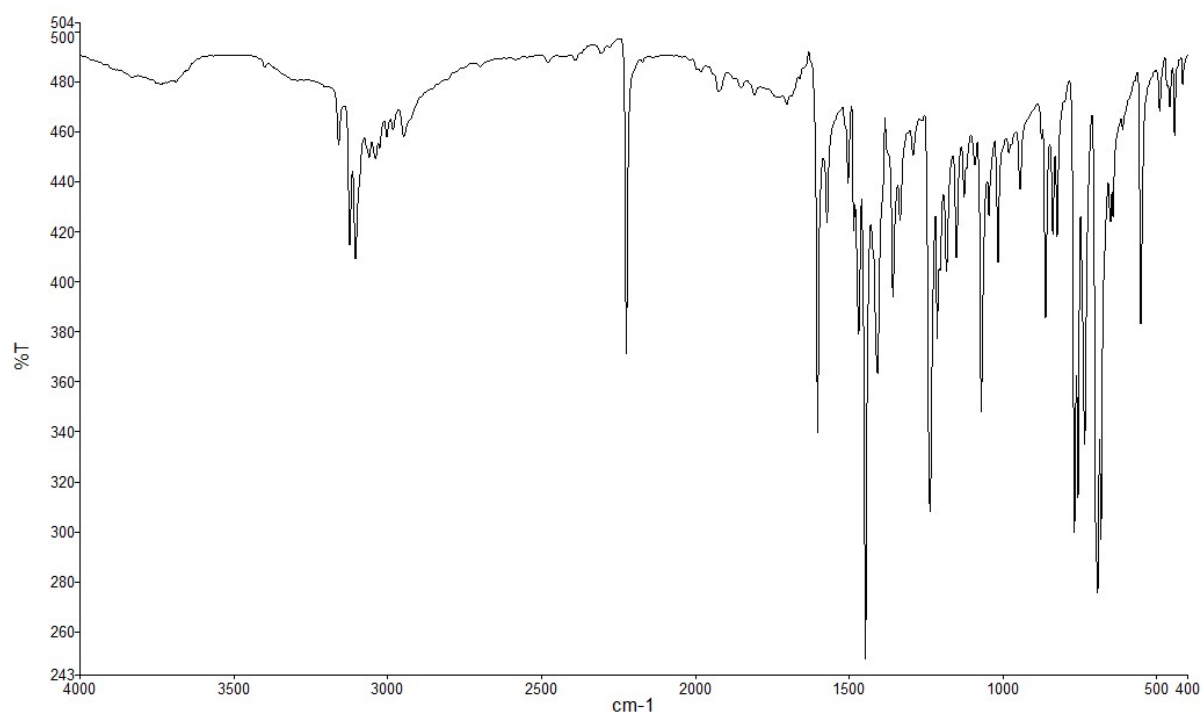

**Figure S57.** IR spectrum of **3d**.

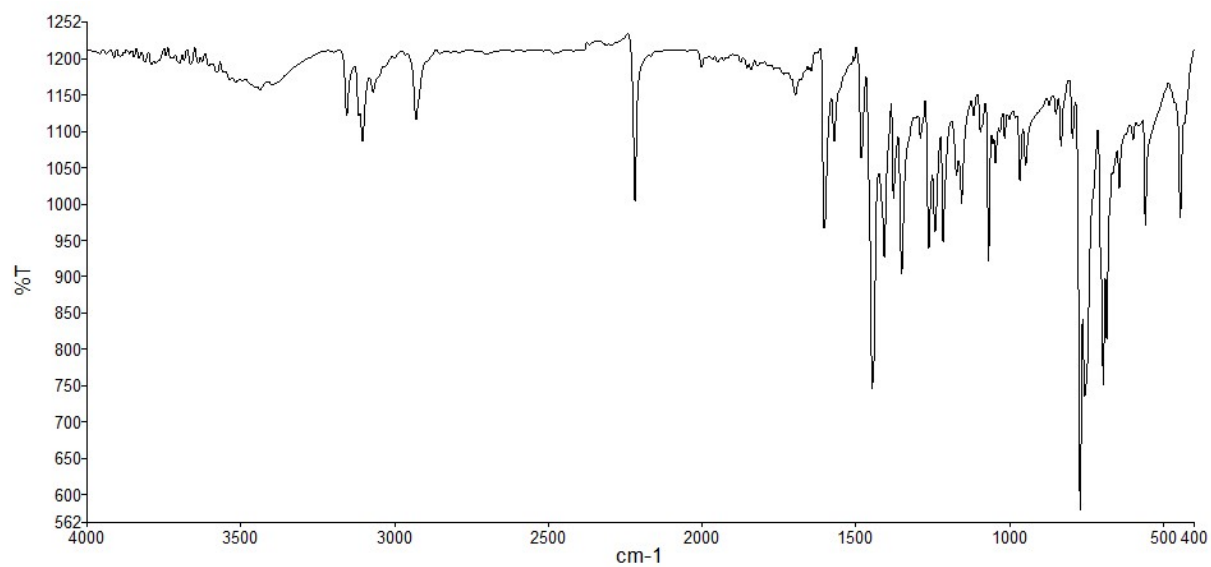

**Figure S58.** IR spectrum of **3e**.

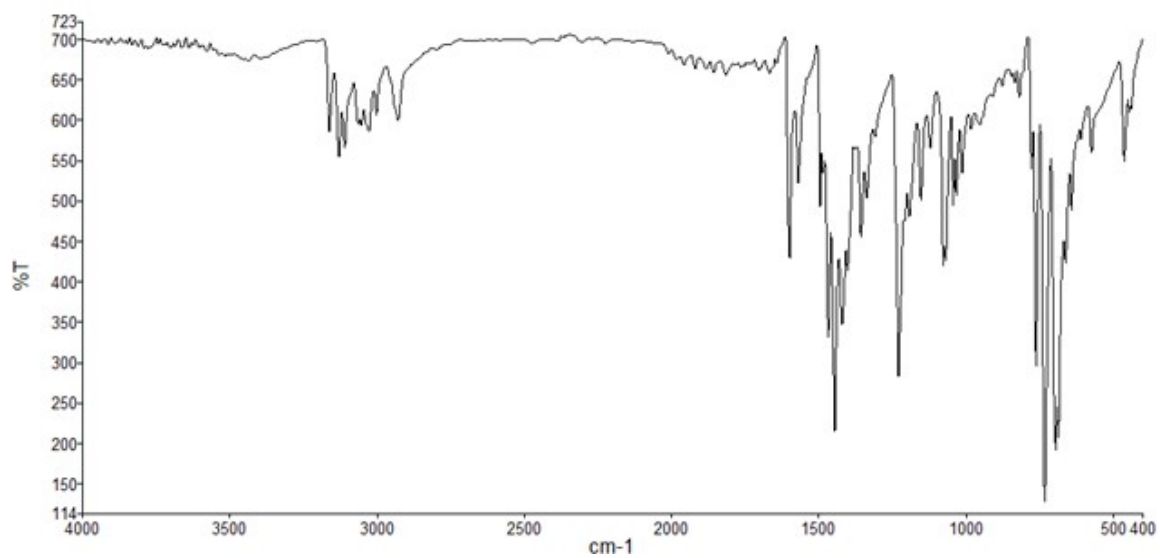

**Figure S59.** IR spectrum of **3f**.

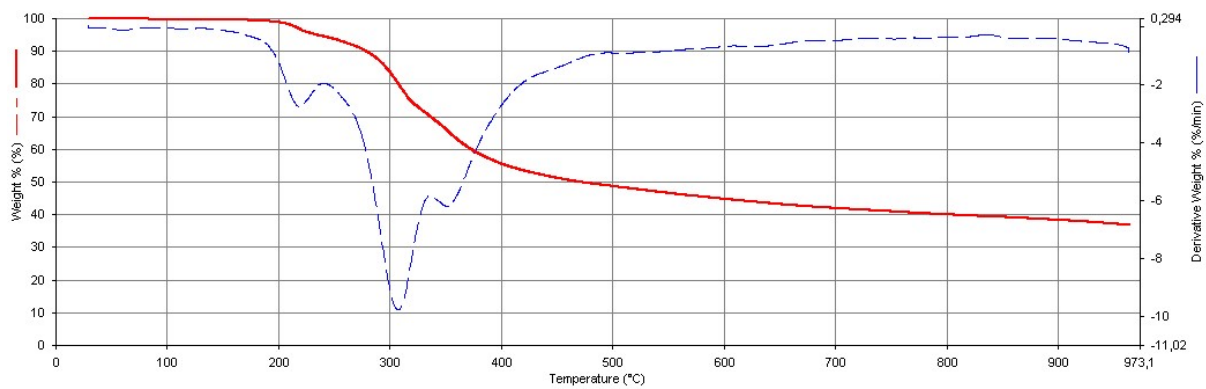

**Figure S60.** TGA spectrum of **3c**.

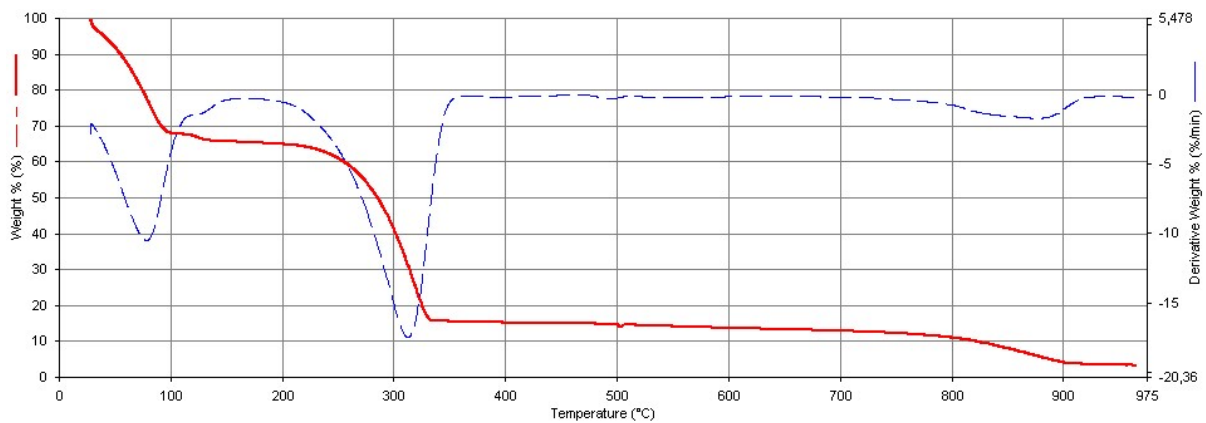

**Figure S61.** TGA spectrum of Pd nanoparticles of **3c**.

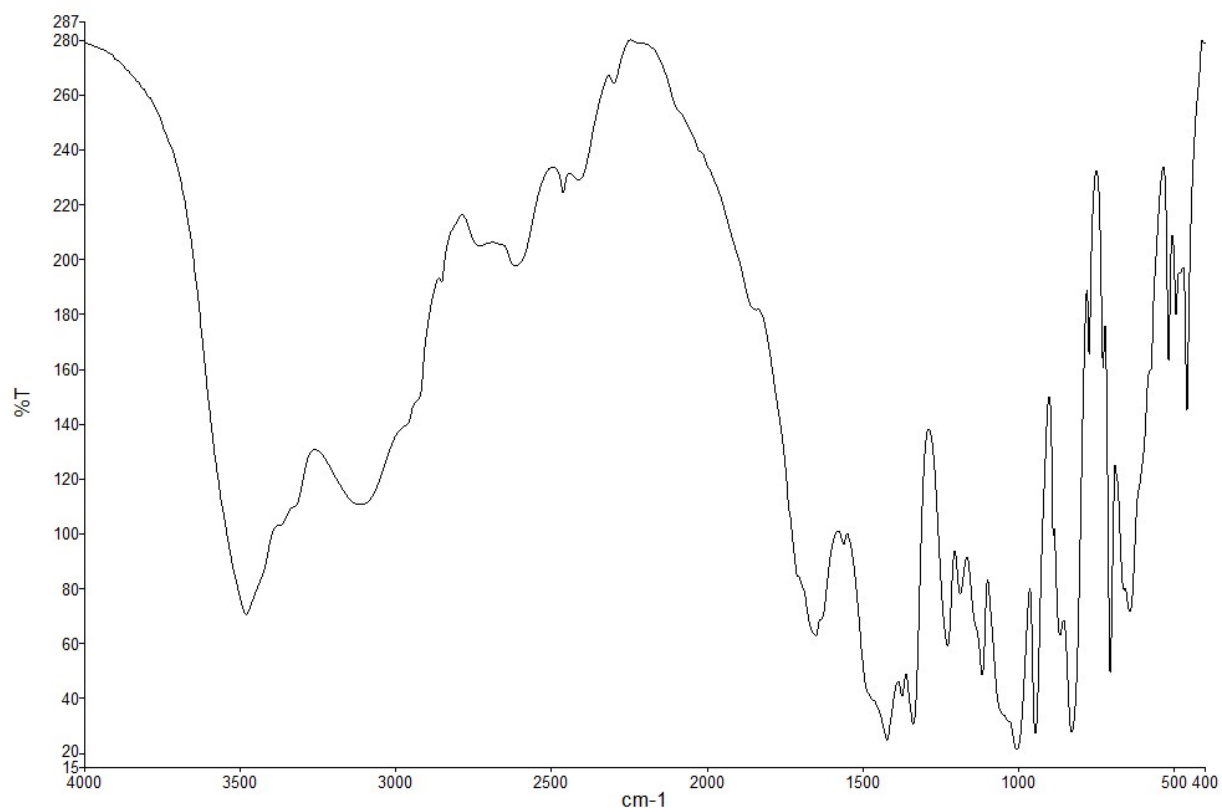

**Figure S62.** FT-IR spectrum of Pd nanoparticles of **3c**.



**Table S1.** Crystal data and structure refinement parameters for **3c**, **3e** and **3f**

| Complex                                                       | <b>3c</b>                                                         | <b>3e</b>                                                         | <b>3f</b>                                                         |
|---------------------------------------------------------------|-------------------------------------------------------------------|-------------------------------------------------------------------|-------------------------------------------------------------------|
| Formula                                                       | C <sub>17</sub> H <sub>16</sub> Br <sub>2</sub> N <sub>4</sub> Pd | C <sub>24</sub> H <sub>19</sub> Br <sub>2</sub> N <sub>5</sub> Pd | C <sub>16</sub> H <sub>17</sub> Br <sub>2</sub> N <sub>3</sub> Pd |
| Formula weight                                                | 542.56                                                            | 643.66                                                            | 517.54                                                            |
| Crystal shape/colour                                          | Prism/orange                                                      | Prism/orange                                                      | Prism/orange                                                      |
| Crystal size (mm)                                             | 0.39×0.29×0.13                                                    | 0.24×0.18×0.14                                                    | 0.34×0.28×0.16                                                    |
| Crystal system                                                | Triclinic                                                         | Monoclinic                                                        | Triclinic                                                         |
| Space group                                                   | <i>P</i> -1                                                       | <i>C</i> 2/ <i>c</i>                                              | <i>P</i> -1                                                       |
| a (Å)                                                         | 7.4786(9)                                                         | 18.6682(12)                                                       | 10.0563(5)                                                        |
| b (Å)                                                         | 11.0996(11)                                                       | 15.9603(13)                                                       | 14.1910(9)                                                        |
| c (Å)                                                         | 11.7959(16)                                                       | 8.1346(5)                                                         | 14.2442(9)                                                        |
| α (°)                                                         | 90.731(10)                                                        | 90                                                                | 72.709(5)                                                         |
| β (°)                                                         | 100.478(10)                                                       | 94.651(6)                                                         | 72.523(5)                                                         |
| γ (°)                                                         | 106.482(10)                                                       | 90                                                                | 72.840(5)                                                         |
| V (Å <sup>3</sup> )                                           | 921.1(2)                                                          | 2415.7(3)                                                         | 1803.4(2)                                                         |
| Z                                                             | 2                                                                 | 4                                                                 | 4                                                                 |
| Z'                                                            | 1                                                                 | 0.5                                                               | 2                                                                 |
| D <sub>x</sub> (g cm <sup>-3</sup> )                          | 1.956                                                             | 1.770                                                             | 1.906                                                             |
| μ (mm <sup>-1</sup> )                                         | 5.35                                                              | 4.097                                                             | 5.459                                                             |
| T <sub>min</sub> , T <sub>max</sub>                           | 0.305, 0.574                                                      | 0.541, 0.634                                                      | 0.537, 0.731                                                      |
| F(000)                                                        | 524                                                               | 1256                                                              | 1000                                                              |
| θ (°)                                                         | 2.89-25.65                                                        | 3.52-23.57                                                        | 3.14-25.02                                                        |
| R <sub>int</sub>                                              | -                                                                 | 0.0298                                                            | 0.0422                                                            |
| Data/restrain/parameter                                       | 3823/3/ 219                                                       | 2274/0/147                                                        | 6760/42/409                                                       |
| Goodness of fit ( <i>F</i> <sup>2</sup> )                     | 1.065                                                             | 1.012                                                             | 1.002                                                             |
| R <sub>1</sub> , wR <sub>2</sub> [ <i>I</i> > 2σ( <i>I</i> )] | 0.0637, 0.2259                                                    | 0.0416, 0.0579                                                    | 0.0488, 0.0639                                                    |
| R <sub>1</sub> , wR <sub>2</sub> (all data)                   | 0.1117, 0.2556                                                    | 0.0889, 0.0705                                                    | 0.1052, 0.0793                                                    |
| Δρ <sub>min</sub> / Δρ <sub>max</sub> (e/Å <sup>3</sup> )     | -1.799, 1.474                                                     | -0.549, 0.349                                                     | -0.881, 0.917                                                     |
